# Supplementary material for: MACF1 controls skeletal muscle function through the microtubule-dependent localization of extra-synaptic myonuclei and mitochondria biogenesis
Source: eLife. 2021 Aug 27;10:e70490. doi: 10.7554/eLife.70490 (PMC8500715; doi:10.7554/eLife.70490)
Supplement: Figure 1—figure supplement 1—source data 1. [file elife-70490-fig1-figsupp1-data1.xlsx]

## Sheet: 1D
MACF1 relative gene expression in C2C12 cells (normalized)			Experiment 1	Experiment 2	Experiment 3	Experiment 4
		MACF1-prolif	100	100	100	100
		MACF1-J1	1025.89	666.891	4952.21	1795.94
		MACF1-J3	5396.04	472.737	2904.06	4850.29
		MACF1-J5	3309.88	864.307	3405.98	4301.2

## Sheet: 1F
	SiScr	Si-Macf1-Mix	SiScr	Si-Macf1-Mix	SiScr	Si-Macf1-Mix	SiScr	Si-Macf1-Mix	SiScr	Si-Macf1-Mix	SiScr	Si-Macf1-Mix
Number of Myonuclei by myotubes	5	5	6	6	7	7	8	8	9	9	10	10
Ferret	168.702	136.95	260.958	205.856	234.043	229.483	260.932	254.428	298.295	375.267	352.574	297.664
	321.518	259.243	222.271	261.282	186.587	287.425	231.169	204.232	276.278	365.653	250.184	224.758
Data obtained from 3 individual experiments	198.933	133.815	257.274	202.132	213.472	289.748	246.762	176.316	184.7	267.544	323.582	406.271
	238.653	174.806	328.264	195.665	227.512	202.337	236.786	273.032	291.951	307.195	410.394	204.148
	240.747	252.749	368.012	158.593	216.34	182.917	319.579	352.869	336.789	338.01	308.874	1208.21
	237.532	160.786	303.369	289.619	389.024	491.814	209.632	229.711	303.63	294.138	374.742	567.76
	185.89	312.347	182.73	190.069	208.366	200.545	272.56	375.118	451.598	230.752	508.49	378.577
	165.049	233.381	264.837	229.852	449.757	218.659	276.102	248.136	419.264	348.566	433.26	245.426
	183.439	347.477	240.525	205.538	257.257	281.333	365.824	648.201	445.571	335.53	458.95	313.722
	318.881	409.601	240.747	217.969	294.165	356.237	199.263	196.936	221.005	539.809	509.854	166.501
	162.688	723.546	530.046	148.048	245.764	253.137	294.579	510.051	232.222	393.915	188.778	185.035
	198.362	246.908	230.589	237.822	255.867	213.574	181.126	182.456	211.554	211.128	327.135	439.294
	246.404	534.117	277.665	208.087	191.203	342.89	295.249	221.566	236.125	168.301	342.319	256.688
	233.276	237.446	298.612	255.238	199.376	420.423	265.228	252.462	284.175	178.806	261.305	312.572
	280.69	307.637	533.832	726.94	154.005	564.561	377.395	273.158	386.405	251.253	208.314	316.989
	274.918	163.717	312.955	326.792	263.192	531.804	182.816	223.23	209.403	251.603	229.686	317.765
	174.837	176.477	208.522	691.444	236.465	534.467	253.051	189.82		365.984		418.891
	291.603	386.77	255.251	486.912	434.436	762.586	232.49	277.792		230.489		307.433
	237.746	158.28	293.427	525.35	245.705	207.706	267.569	244.741		267.937		202.379
	164.575	305.449	233.544	361.985	252.504	149.445	268.745	207.738		359.413		264.543
	192.44	439.135	288.575	336.967	175.868	156.473	254.885	226.236		267.694		151.24
	216.621	464.772	189.977	276.293	334.327	135.464	260.204	224.018		431.486		229.903
	248.587	267.183	156.926	117.519	193.94	313.33	261.908	235.213		179.631		180.583
	254.746	139.045	197.674	199.706	205.876	228.461	204.619	289.53		466.751		192.354
	204.342	202.361	267.208	136.764	218.715	213.01	292.677	202.786		268.857		264.736
	312.13	191.117	390.57	165.665	226.912	155.525	232.57	197.114		280.974		276.268
	202.684	144.763	291.88	125.105	305.621	260.523		201.32		198.685		197.047
	202.186	235.955	236.687	103.997	363.81	171.168		352.424		159.586		260.475
	140.705	306.381	177.861	267.985	343.499	265.409		159.753		425.074		294.531
	194.65	211.764	175.478	206.832	258.761	120.518		211.474		172.452		307.159
	216.46	337.318	206.597	320.09	171.964	235.63		216.816		192.032		169.049
	169.403	193.698	270.063	362.587	185.556	186.48		200.886		208.853		257.3
		118.638	210.848	344.716	198.221	180.032		127.679		280.442
		229.678	188.826	199.388	210.781	285.522		236.76		227.035
		307.226	331.457	176.133	282.778	165.837		248.11		379.359
		218.67	170.524	241.272		181.395		241.999		292.512
		208.888	244.264	199.038		195.12		156.447		336.367
		192.224		226.248		223.108		249.674		504.791
		196.831		177.931		222.375		222.488		395.957
		205.212		193.037		363.362		237.809		412.756
		191.394		405.559		273.311		231.17		321.066
		219.613		204.249		152.985		224.03		311.155
		254.088		269.965		168.399		277.72		332.285
		210.733		211.46		313.703		207.029		336.7
		250.991		193.742		191.378		271.894		356.92
		159.336		151.333		321.647		262.214		175.962
		242.087		293.228		235.15		214.75		176.228
		242.836		225.906		241.91		261.501		234.192
		275.886		195.801		229.636		264.756		194.406
		198.26		140.303		226.219		176.066		454.961
		160.688		155.136		243.207		353.154		282.109
		295.008		212.177		224.697				224.464
		240.336		128.653		264.24				232.351
		266.591		257.409		340.414				375.278
		333.063		206.99		204.671
		263.082		156.299		138.181
		302.836		365.541		279.511
		338.138		224.728		285.28
		361.143		223.408		170.597
		143.474		211.743		322.113
		194.995		186.566		234.299
		169.528		317.624		273.48
		195.462		193.862		256.378
		158.541		141.702		270.175
		197.039		247.845		213.131
		238.036		229.136		210.212
				255.889		212.503
				242.808		344.758
				291.88		439.875
				212.302		202.897
				167.652		303.743
				224.756		468.796
				239.485		199.206
				317.87		225.106
				318.289
				282.125
				138.903
				264.139
				153.495

## Sheet: 1G
	SiScr	Si-Macf1-Mix	SiScr	Si-Macf1-Mix	SiScr	Si-Macf1-Mix	SiScr	Si-Macf1-Mix	SiScr	Si-Macf1-Mix	SiScr	Si-Macf1-Mix
Number of Myonuclei by myotubes	5	5	6	6	7	7	8	8	9	9	10	10
DMCM	28.6094	26.1873	79.3702	60.755	63.7669	48.1423	60.6035	40.3698	61.6336	98.2703	81.3826	124.131
	90.2947	42.5842	52.959	167.319	28.3645	17.6747	53.6987	34.7611	61.5556	93.8815	53.1129	86.7659
Data obtained from 3 individual experiments	46.8308	35.0206	65.3127	46.9348	29.8254	22.7914	44.7189	29.1352	34.0546	103.196	89.139	61.2359
	39.88	49.9689	96.0165	47.2092	60.5415	31.37	25.7872	81.6483	64.5824	51.8458	94.7262	56.1332
	55.3842	25.6896	102.27	31.073	43.0724	54.909	73.1629	66.5521	81.2828	71.3444	80.7936	63.6786
	49.9796	17.9647	91.2354	13.558	119.266	97.0331	42.6223	92.9973	67.2792	26.2805	95.2239	52.6536
	28.6146	21.6604	46.56	35.3575	51.3461	37.6167	63.7329	46.071	92.9457	45.5595	69.5802	120.178
	47.9041	31.749	65.4854	53.0569	157.771	39.22	66.0268	98.0352	91.3826	32.338	99.0907	67.8493
	25.6193	25.9841	55.5561	89.5969	51.7607	39.7323	96.5342	65.1359	93.769	106.327	142.976	74.2663
	98.6415	87.7014	48.0939	32.4887	40.6458	62.3624	53.2431	52.8807	45.8491	40.8477	137.387	50.7187
	22.3406	18.5903	93.666	29.9514	54.8023	26.3263	68.3157	26.1353	49.2409	35.4754	120.885	63.044
	27.2615	50.4065	55.3003	49.568	43.1891	69.3239	26.6239	30.4958	56.8335	29.1805	137.119	22.9505
	60.7706	34.1433	74.509	38.9158	49.0796	37.9443	105.53	38.5243	68.1351	64.9456	28.6538	23.8249
	46.3477	33.0395	40.43	55.9558	29.9955	34.6738	89.9866	45.947	71.0981	42.7043	97.2937	117.635
	81.3158	68.5846	103.954	77.248	27.4828	75.4332	90.8395	51.426	125.611	131.915	88.0393	59.956
	81.1767	34.2291	45.2299	48.6748	66.6073	32.7639	16.2501	86.1251	49.0011	16.8521	54.0573	68.0326
	44.5454	24.2456	29.2193	98.4039	66.7578	30.3101	49.0019	58.5288		88.4193	32.3566	59.4158
	36.169	66.6087	81.863	21.2734	113.832	11.1062	33.4627	35.9227		91.0504	45.3005	61.8688
	43.3021	112.016	100.73	48.3544	60.6731	92.5913	64.9192	58.6344		66.4404		92.7908
	23.9394	53.685	23.8151	36.7966	78.8828	52.7141	62.693	62.5318		131.503		65.7153
	32.6708	115.858	102.981	29.318	27.2363	47.2097	69.6875	50.3211		22.4381		44.7866
	61.7963	46.5267	48.4735	14.2476	96.3919	38.6519	70.5278	32.7228		112.807		49.6499
	60.2553	30.9474	31.6562	11.8375	41.7757	69.6799	68.4758	27.0405		64.7532		22.6924
	34.217	41.5479	30.6988	76.7919	21.0884	15.8097	63.1091	35.0032		84.0543		23.2365
	34.2879	74.402	68.5745	47.6273	30.9858	77.179	67.505	47.168		22.041		38.4057
	70.5192	60.4788	106.602	62.1154	30.9855	11.8125	52.4437	49.0141		23.0274		42.5289
	54.8854	49.1132	94.9239	121.339	98.3195	63.9411		46.0835		103.836		59.4285
	32.0838	42.1162	57.2826	84.5759	107.292	23.316		42.386		32.9038		60.6494
	25.1179	49.3309	21.477	43.7767	104.988	45.4052		86.8019		17.4187		27.2989
	24.0403	38.7902	18.5471	33.2376	17.9924	71.1688		29.2877		51.7212		41.3335
	23.4981	20.0969	42.2099	49.28	38.8209	26.4496		26.5592		64.7638		87.5096
	35.4122	60.2797	79.8702	45.5014	22.0015	42.5691		48.7796		37.9217		76.5005
		48.9671	30.6706	45.1228	35.3943	27.161		34.5827		94.6058		33.8068
		43.3882	32.9194	34.2763	44.7038	51.3393		13.9748		65.2953		63.9443
		53.7478	87.7068	24.5479	65.757	53.5969		53.5533		84.0235		90.6272
		28.0348	28.658	129.18		122.425		67.886		175.567		81.87
		62.2221	85.3298	38.859		66.8843		64.0129		97.5629		40.5455
		81.7972		79.2133		30.2038		38.1216		103.331		46.2883
		80.9908		48.0915		20.7133		56.769		88.4928		90.5821
		52.1498		47.3528		57.0017		66.2602		87.4333
		28.6991		22.512		30.0257		53.121		105.9
		56.4639		62.288		94.2571		53.8308		88.8831
		68.2685		54.4299		50.453		40.1865		77.0535
		70.7922		23.2999		53.0513		70.0528		28.0813
		111.771		27.0698		57.4464		58.8349		39.603
		27.9857		25.3915		48.7284		57.4142		57.6301
		82.0411		40.323		65.0826		36.6832		43.7517
		96.3185		21.5256		38.7629		43.6909
		101.384		79.3299		54.0404		80.521
		12.5867		45.9834		115.847		86.5392
		61.7827		37.8261		55.1138		36.5437
		33.0405		123.193		16.6538		137.667
		52.0996		46.2047		67.4578
		32.0987		42.2018		52.2317
		42.6324		60.0052		41.7407
		73.2538		29.5935		85.8214
				78.7244		68.0305
				43.2917		81.3273
				39.1339		61.4886
				55.7105		65.2376
				25.7556		56.4676
				39.7018		39.1274
				51.1102		57.3853
				71.2854		99.159
				62.2515		111.01
				54.2223		61.5783
				60.9804		74.9049
				27.3432		170.618
				108.956		58.4028
				80.3205		57.2668
				45.036
				20.4473
				50.7701
				34.9001
				28.6059
				62.1089
				34.7308
				43.9313
				21.4741
				40.8775
				76.9471
				57.1515
				111.461
				36.1454
				96.1532
				58.3346
				64.9494
				65.5454
				20.8886
				43.6859
				18.9839
				66.3099
				22.7136
				44.1101
				44.6962
