# Supplementary material for: MACF1 controls skeletal muscle function through the microtubule-dependent localization of extra-synaptic myonuclei and mitochondria biogenesis
Source: eLife. 2021 Aug 27;10:e70490. doi: 10.7554/eLife.70490 (PMC8500715; doi:10.7554/eLife.70490)
Supplement: Figure 1—figure supplement 2—source data 1. [file elife-70490-fig1-figsupp2-data1.xlsx]

## Sheet: 2A
	SiRNA experiments						ShRNA experiments
Myofiber width	siSCR	siMACF1.1	siMACF1.2	siMACF1.3	siMACF1.mix		shSCR	shMACF1.1	shMACF1.2	shMACF1.3	shMACF1.4	shMACF1.mix
	2.942	2.695	13.926	1.847	17.823		13.634	2.276	14.77	2.737	16.523	2.918
data obtained from 3 individual experiments	3.321	2.81	13.513	2.596	15.616		12.86	2.596	12.811	2.941	16.413	2.98
	3.364	3.044	12.683	2.652	12.776		12.596	2.619	12.499	2.941	15.709	3.033
	3.672	3.249	12.59	2.863	12.59		12.467	2.648	12.221	2.97	15.163	3.289
	3.678	3.346	12.392	2.899	12.392		12.444	2.745	12.162	2.97	14.627	3.321
	3.678	3.377	12.077	3.289	12.348		12.079	3.033	12.043	3.067	13.685	3.321
	3.678	3.762	12.01	3.289	12.12		11.848	3.072	11.974	3.173	13.563	3.403
	3.75	3.811	11.974	3.289	11.678		11.706	3.168	11.881	3.228	13.157	3.436
	3.75	3.811	11.806	3.321	11.375		11.644	3.168	11.592	3.311	12.866	3.468
	3.762	3.829	11.518	3.321	11.287		11.63	3.228	11.44	3.321	12.811	3.468
	3.795	3.871	11.486	3.321	11.285		11.364	3.346	11.44	3.388	12.709	3.486
	3.876	3.919	11.227	3.321	11.251		11.242	3.436	11.433	3.395	12.684	3.495
	3.897	3.924	10.904	3.346	10.881		11.237	3.448	11.344	3.436	12.504	3.569
	4.049	3.924	10.887	3.377	10.827		11.183	3.468	11.203	3.481	12.23	3.569
	4.049	3.94	10.858	3.395	10.814		11.177	3.468	11.132	3.492	12.209	3.615
	4.065	4.008	10.404	3.395	10.539		11.11	3.481	11.093	3.563	12.126	3.619
	4.08	4.008	10.402	3.51	10.531		11.024	3.503	11.046	3.632	11.69	3.619
	4.105	4.035	10.324	3.563	10.364		11.001	3.51	10.98	3.643	11.599	3.672
	4.303	4.049	10.259	3.569	10.233		10.967	3.511	10.957	3.651	11.587	3.678
	4.38	4.065	10.218	3.609	10.147		10.967	3.514	10.866	3.678	11.572	3.678
	4.38	4.065	9.946	3.609	10.128		10.934	3.555	10.858	3.695	11.556	3.729
	4.394	4.08	9.868	3.632	10.046		10.888	3.601	10.639	3.745	11.544	3.75
	4.404	4.08	9.86	3.678	9.87		10.881	3.609	10.584	3.758	11.506	3.762
	4.413	4.1	9.86	3.745	9.847		10.841	3.643	10.539	3.795	11.442	3.788
	4.479	4.126	9.674	3.762	9.811		10.829	3.688	10.436	3.876	11.44	3.795
	4.507	4.126	9.562	3.795	9.809		10.738	3.737	10.396	3.881	11.266	3.871
	4.562	4.131	9.551	3.795	9.642		10.673	3.745	10.273	3.881	11.086	3.897
	4.562	4.161	9.538	3.833	9.629		10.643	3.762	10.224	3.897	11.077	3.924
	4.584	4.161	9.52	3.871	9.433		10.552	3.839	10.202	3.897	11.033	3.931
	4.584	4.164	9.516	3.897	9.393		10.468	3.908	10.153	3.908	10.902	3.94
	4.602	4.186	9.51	3.919	9.261		10.458	3.931	10.046	3.924	10.881	3.945
	4.652	4.186	9.51	3.961	9.261		10.45	3.94	9.904	3.961	10.812	3.961
	4.652	4.245	9.49	3.961	9.216		10.42	3.961	9.868	4.018	10.773	4.046
	4.652	4.345	9.483	3.961	9.123		10.408	4.006	9.858	4.035	10.766	4.08
	4.661	4.394	9.433	3.961	9.031		10.251	4.042	9.796	4.08	10.606	4.082
	4.71	4.404	9.404	3.961	9.018		10.181	4.11	9.74	4.105	10.602	4.1
	4.758	4.404	9.404	4.008	8.976		10.147	4.131	9.672	4.122	10.529	4.1
	4.758	4.488	9.306	4.08	8.941		10.128	4.133	9.581	4.131	10.45	4.105
	4.776	4.493	9.25	4.08	8.831		10.029	4.175	9.426	4.131	10.394	4.105
	4.776	4.53	9.225	4.1	8.81		10.015	4.186	9.407	4.161	10.372	4.11
	4.815	4.584	9.169	4.131	8.81		10.004	4.201	9.394	4.173	10.358	4.131
	4.849	4.584	9.162	4.161	8.763		10.002	4.311	9.393	4.201	10.357	4.131
	4.849	4.591	9.123	4.186	8.715		9.975	4.323	9.365	4.206	10.291	4.131
	4.849	4.616	9.089	4.186	8.698		9.882	4.327	9.362	4.206	10.291	4.159
	4.849	4.622	9.089	4.201	8.686		9.879	4.337	9.29	4.303	10.189	4.196
	4.866	4.692	9.059	4.201	8.667		9.87	4.366	9.261	4.323	10.163	4.201
	4.9	4.692	9.031	4.206	8.609		9.745	4.394	9.225	4.323	10.145	4.206
	4.904	4.71	9.013	4.206	8.607		9.649	4.409	9.216	4.361	10.133	4.206
	4.913	4.743	8.997	4.206	8.607		9.603	4.409	9.164	4.366	10.13	4.237
	4.913	4.758	8.976	4.206	8.58		9.586	4.409	9.123	4.413	10.128	4.246
	4.934	4.762	8.941	4.206	8.57		9.562	4.409	9.109	4.413	10.018	4.258
	4.934	4.762	8.941	4.245	8.57		9.562	4.455	9.037	4.484	10.015	4.26
	4.964	4.78	8.941	4.327	8.524		9.555	4.471	9.036	4.493	10.008	4.271
	4.964	4.78	8.906	4.337	8.512		9.539	4.474	9.018	4.507	9.971	4.276
	4.964	4.802	8.866	4.361	8.502		9.513	4.474	8.996	4.562	9.963	4.289
	5.001	4.836	8.857	4.38	8.49		9.503	4.479	8.988	4.582	9.877	4.289
	5.018	4.859	8.85	4.413	8.49		9.483	4.484	8.985	4.584	9.863	4.289
	5.018	4.866	8.838	4.413	8.485		9.454	4.493	8.962	4.652	9.86	4.309
	5.038	4.876	8.808	4.455	8.426		9.342	4.53	8.962	4.666	9.831	4.323
	5.038	4.9	8.772	4.479	8.401		9.3	4.546	8.957	4.696	9.814	4.323
	5.038	4.904	8.76	4.493	8.324		9.279	4.553	8.948	4.696	9.813	4.323
	5.1	4.904	8.715	4.493	8.304		9.25	4.553	8.894	4.696	9.788	4.337
	5.1	4.923	8.715	4.516	8.284		9.243	4.562	8.884	4.727	9.752	4.38
	5.1	4.934	8.715	4.53	8.284		9.236	4.584	8.866	4.751	9.752	4.38
	5.104	4.934	8.657	4.584	8.254		9.218	4.614	8.857	4.758	9.745	4.38
	5.112	4.96	8.6	4.584	8.224		9.187	4.614	8.838	4.78	9.698	4.394
	5.116	4.968	8.578	4.584	8.213		9.187	4.625	8.833	4.815	9.692	4.444
	5.116	4.98	8.578	4.602	8.206		9.123	4.655	8.826	4.836	9.666	4.444
	5.137	5.018	8.57	4.602	8.206		9.116	4.661	8.781	4.836	9.636	4.444
	5.149	5.027	8.57	4.616	8.206		9.098	4.663	8.774	4.889	9.623	4.455
	5.149	5.029	8.522	4.652	8.152		9.089	4.692	8.715	4.896	9.594	4.474
	5.149	5.038	8.519	4.652	8.145		9.054	4.696	8.692	4.9	9.586	4.493
	5.161	5.038	8.446	4.656	8.124		9.006	4.715	8.679	4.913	9.579	4.493
	5.161	5.051	8.433	4.661	8.124		8.978	4.732	8.679	4.913	9.551	4.507
	5.161	5.1	8.426	4.661	8.099		8.974	4.762	8.672	4.93	9.532	4.562
	5.165	5.1	8.426	4.696	8.091		8.957	4.762	8.66	4.934	9.492	4.562
	5.201	5.118	8.411	4.696	8.083		8.857	4.78	8.66	4.964	9.466	4.584
	5.201	5.158	8.374	4.696	8.039		8.838	4.786	8.657	4.983	9.433	4.584
	5.201	5.161	8.371	4.71	8.037		8.826	4.786	8.629	5.001	9.386	4.584
	5.201	5.165	8.334	4.71	8.037		8.763	4.849	8.609	5.052	9.364	4.584
	5.213	5.21	8.284	4.732	8.016		8.66	4.858	8.607	5.052	9.36	4.614
	5.213	5.21	8.261	4.758	7.998		8.66	4.866	8.551	5.067	9.358	4.652
	5.225	5.21	8.261	4.762	7.98		8.655	4.896	8.524	5.067	9.316	4.652
	5.229	5.225	8.251	4.762	7.88		8.619	4.9	8.512	5.103	9.304	4.655
	5.229	5.276	8.224	4.78	7.875		8.522	4.904	8.429	5.112	9.304	4.656
	5.265	5.276	8.224	4.815	7.875		8.512	4.913	8.426	5.112	9.272	4.682
	5.292	5.292	8.183	4.815	7.872		8.453	4.923	8.412	5.116	9.225	4.696
	5.292	5.292	8.17	4.836	7.872		8.429	4.929	8.411	5.116	9.212	4.71
	5.304	5.305	8.165	4.904	7.837		8.404	4.93	8.401	5.118	9.18	4.711
	5.304	5.308	8.152	4.904	7.837		8.386	4.934	8.386	5.135	9.135	4.719
	5.304	5.312	8.129	4.913	7.819		8.364	4.954	8.374	5.137	9.135	4.721
	5.304	5.32	8.122	4.913	7.819		8.327	4.966	8.332	5.161	9.064	4.732
	5.308	5.339	8.099	4.913	7.808		8.253	4.983	8.302	5.161	9.031	4.737
	5.32	5.355	8.078	4.913	7.768		8.208	5.001	8.284	5.165	9.006	4.758
	5.32	5.355	8.029	4.934	7.741		8.202	5.014	8.261	5.201	8.978	4.762
	5.32	5.355	8.016	4.938	7.712		8.189	5.019	8.259	5.202	8.971	4.762
	5.386	5.357	8	4.964	7.668		8.17	5.031	8.217	5.21	8.969	4.762
	5.39	5.366	7.966	4.98	7.657		8.163	5.031	8.206	5.229	8.948	4.776
	5.39	5.366	7.946	4.98	7.617		8.163	5.038	8.199	5.229	8.902	4.815
	5.401	5.39	7.938	4.98	7.581		8.163	5.038	8.18	5.276	8.857	4.815
	5.42	5.401	7.938	5.018	7.581		8.163	5.044	8.143	5.292	8.85	4.818
	5.432	5.401	7.935	5.038	7.548		8.124	5.044	8.124	5.304	8.826	4.828
	5.474	5.413	7.935	5.038	7.523		8.083	5.047	8.122	5.32	8.817	4.836
	5.474	5.42	7.935	5.038	7.523		8.076	5.051	8.122	5.32	8.81	4.848
	5.481	5.432	7.935	5.038	7.49		8.07	5.051	8.099	5.339	8.81	4.848
	5.493	5.489	7.88	5.047	7.482		8.07	5.052	8.093	5.339	8.808	4.849
	5.508	5.508	7.88	5.067	7.47		8.051	5.116	8.083	5.339	8.774	4.849
	5.549	5.512	7.88	5.067	7.417		8.047	5.116	8.051	5.386	8.686	4.849
	5.568	5.512	7.875	5.1	7.395		8.047	5.116	8.05	5.386	8.679	4.86
	5.568	5.512	7.872	5.1	7.392		8.032	5.135	8.047	5.399	8.679	4.904
	5.568	5.512	7.851	5.1	7.389		8.021	5.135	8.046	5.415	8.674	4.904
	5.572	5.523	7.837	5.1	7.369		8	5.149	8.037	5.432	8.607	4.905
	5.602	5.549	7.837	5.104	7.355		7.998	5.152	8.021	5.432	8.6	4.913
	5.602	5.568	7.795	5.112	7.355		7.979	5.152	8.009	5.474	8.568	4.923
	5.602	5.568	7.795	5.116	7.355		7.966	5.165	8.007	5.481	8.522	4.968
	5.628	5.568	7.768	5.137	7.344		7.945	5.165	8	5.499	8.522	4.969
	5.642	5.568	7.741	5.161	7.324		7.935	5.193	7.966	5.499	8.522	4.98
	5.642	5.572	7.69	5.161	7.313		7.88	5.201	7.955	5.523	8.49	5.014
	5.683	5.572	7.679	5.201	7.313		7.875	5.201	7.938	5.549	8.49	5.038
	5.69	5.572	7.668	5.201	7.304		7.875	5.201	7.938	5.549	8.463	5.038
	5.712	5.574	7.666	5.213	7.299		7.875	5.201	7.922	5.549	8.44	5.038
	5.712	5.595	7.647	5.225	7.299		7.872	5.213	7.88	5.553	8.411	5.038
	5.712	5.602	7.622	5.225	7.29		7.872	5.215	7.875	5.553	8.404	5.047
	5.716	5.602	7.617	5.225	7.236		7.848	5.225	7.848	5.568	8.401	5.051
	5.716	5.613	7.617	5.229	7.212		7.848	5.247	7.848	5.568	8.401	5.064
	5.716	5.613	7.592	5.292	7.212		7.848	5.265	7.814	5.574	8.394	5.065
	5.727	5.642	7.592	5.292	7.212		7.823	5.285	7.813	5.595	8.374	5.1
	5.727	5.642	7.551	5.296	7.212		7.819	5.303	7.792	5.602	8.374	5.1
	5.748	5.657	7.548	5.308	7.186		7.789	5.304	7.785	5.613	8.371	5.1
	5.759	5.657	7.526	5.308	7.186		7.783	5.308	7.783	5.642	8.334	5.107
	5.759	5.668	7.526	5.32	7.186		7.783	5.308	7.755	5.642	8.332	5.112
	5.77	5.711	7.523	5.339	7.186		7.768	5.312	7.754	5.697	8.328	5.118
	5.77	5.712	7.523	5.339	7.175		7.759	5.32	7.722	5.706	8.327	5.137
	5.77	5.716	7.523	5.355	7.125		7.722	5.339	7.712	5.712	8.307	5.149
	5.774	5.727	7.507	5.355	7.117		7.682	5.355	7.712	5.716	8.266	5.149
	5.774	5.727	7.507	5.355	7.105		7.679	5.363	7.698	5.716	8.261	5.193
	5.799	5.745	7.49	5.366	7.105		7.657	5.366	7.695	5.716	8.261	5.193
	5.802	5.745	7.49	5.386	7.105		7.655	5.366	7.69	5.716	8.254	5.197
	5.835	5.745	7.482	5.386	7.073		7.647	5.386	7.668	5.717	8.253	5.201
	5.842	5.745	7.426	5.386	7.07		7.647	5.39	7.666	5.723	8.251	5.201
	5.842	5.745	7.426	5.386	7.07		7.645	5.406	7.581	5.738	8.224	5.201
	5.842	5.759	7.426	5.386	7.07		7.639	5.432	7.526	5.745	8.224	5.213
	5.842	5.77	7.426	5.386	7.034		7.637	5.443	7.523	5.759	8.211	5.215
	5.842	5.77	7.414	5.401	7.011		7.622	5.443	7.507	5.759	8.146	5.225
	5.916	5.774	7.389	5.42	6.978		7.622	5.481	7.501	5.77	8.146	5.225
	5.916	5.778	7.369	5.42	6.972		7.592	5.491	7.495	5.77	8.124	5.243
	5.92	5.778	7.369	5.432	6.963		7.592	5.493	7.482	5.773	8.124	5.245
	5.93	5.802	7.355	5.443	6.948		7.589	5.493	7.482	5.777	8.091	5.276
	5.93	5.835	7.355	5.474	6.939		7.589	5.493	7.445	5.778	8.083	5.285
	5.948	5.842	7.355	5.474	6.936		7.574	5.499	7.426	5.796	8.061	5.292
	5.948	5.842	7.355	5.474	6.936		7.573	5.523	7.414	5.811	8.029	5.292
	6	5.842	7.355	5.474	6.936		7.523	5.549	7.392	5.826	8.029	5.296
	6	5.842	7.347	5.481	6.924		7.507	5.549	7.392	5.835	8.029	5.308
	6.024	5.874	7.344	5.493	6.903		7.507	5.549	7.378	5.845	7.998	5.308
	6.024	5.884	7.324	5.493	6.903		7.501	5.567	7.377	5.874	7.989	5.339
	6.024	5.91	7.313	5.512	6.903		7.47	5.568	7.357	5.874	7.98	5.341
	6.024	5.916	7.313	5.549	6.858		7.392	5.568	7.355	5.884	7.974	5.356
	6.024	5.929	7.313	5.568	6.858		7.391	5.586	7.355	5.888	7.959	5.357
	6.028	5.93	7.313	5.568	6.855		7.372	5.595	7.347	5.916	7.938	5.363
	6.028	5.93	7.299	5.568	6.842		7.372	5.602	7.328	5.916	7.935	5.366
	6.055	5.97	7.299	5.572	6.842		7.372	5.602	7.299	5.92	7.935	5.386
	6.055	5.97	7.281	5.572	6.842		7.358	5.602	7.294	5.93	7.935	5.386
	6.086	6	7.244	5.602	6.818		7.358	5.602	7.29	5.958	7.912	5.4
	6.113	6.024	7.236	5.602	6.809		7.355	5.642	7.248	5.96	7.875	5.406
	6.12	6.024	7.236	5.602	6.781		7.355	5.642	7.244	5.97	7.848	5.41
	6.12	6.026	7.218	5.613	6.781		7.355	5.657	7.219	6	7.837	5.413
	6.123	6.055	7.212	5.628	6.781		7.334	5.665	7.212	6.024	7.808	5.415
	6.123	6.086	7.212	5.628	6.757		7.324	5.668	7.207	6.024	7.777	5.42
	6.137	6.113	7.175	5.628	6.757		7.313	5.672	7.175	6.041	7.768	5.421
	6.137	6.123	7.125	5.642	6.732		7.294	5.672	7.175	6.065	7.752	5.443
	6.137	6.123	7.125	5.642	6.729		7.29	5.672	7.145	6.065	7.741	5.443
	6.174	6.123	7.125	5.657	6.729		7.29	5.69	7.145	6.086	7.741	5.443
	6.174	6.137	7.117	5.657	6.692		7.264	5.706	7.125	6.086	7.69	5.47
	6.174	6.137	7.096	5.672	6.692		7.264	5.717	7.125	6.097	7.679	5.474
	6.194	6.137	7.07	5.716	6.692		7.244	5.723	7.117	6.12	7.679	5.474
	6.204	6.137	7.07	5.727	6.682		7.244	5.738	7.112	6.123	7.666	5.49
	6.204	6.137	7.07	5.727	6.642		7.23	5.745	7.096	6.123	7.666	5.493
	6.204	6.137	7.043	5.745	6.642		7.229	5.748	7.096	6.134	7.637	5.493
	6.204	6.146	7.025	5.748	6.635		7.217	5.777	7.081	6.134	7.635	5.499
	6.204	6.174	7.019	5.77	6.62		7.213	5.798	7.081	6.151	7.622	5.499
	6.214	6.194	7.019	5.77	6.62		7.213	5.799	7.081	6.163	7.617	5.546
	6.218	6.196	6.978	5.77	6.607		7.212	5.802	7.07	6.174	7.573	5.549
	6.228	6.204	6.972	5.77	6.607		7.212	5.831	7.069	6.204	7.573	5.549
	6.228	6.215	6.963	5.77	6.591		7.186	5.838	6.978	6.218	7.573	5.549
	6.245	6.233	6.963	5.835	6.579		7.186	5.838	6.969	6.228	7.529	5.555
	6.284	6.233	6.936	5.835	6.579		7.17	5.838	6.963	6.246	7.523	5.555
	6.284	6.238	6.936	5.842	6.579		7.152	5.845	6.963	6.284	7.511	5.568
	6.284	6.241	6.93	5.842	6.569		7.143	5.845	6.948	6.284	7.501	5.572
	6.298	6.241	6.924	5.842	6.531		7.137	5.874	6.943	6.298	7.496	5.572
	6.301	6.241	6.882	5.845	6.531		7.106	5.884	6.936	6.298	7.49	5.595
	6.301	6.241	6.858	5.884	6.531		7.091	5.905	6.936	6.301	7.482	5.602
	6.324	6.258	6.858	5.884	6.531		7.081	5.929	6.93	6.331	7.47	5.602
	6.324	6.284	6.858	5.884	6.528		7.081	5.93	6.927	6.334	7.426	5.613
	6.327	6.284	6.842	5.884	6.493		7.08	5.93	6.927	6.334	7.392	5.621
	6.327	6.298	6.839	5.888	6.493		7.077	5.941	6.908	6.337	7.377	5.621
	6.334	6.301	6.839	5.888	6.483		7.07	5.941	6.902	6.39	7.369	5.621
	6.337	6.322	6.818	5.916	6.451		7.046	5.948	6.858	6.398	7.366	5.633
	6.354	6.334	6.818	5.916	6.451		7.043	5.948	6.858	6.398	7.355	5.642
	6.354	6.337	6.79	5.93	6.441		7.006	5.948	6.842	6.402	7.313	5.651
	6.354	6.376	6.781	5.93	6.406		6.978	5.972	6.839	6.422	7.313	5.657
	6.354	6.376	6.781	5.93	6.386		6.974	5.987	6.839	6.451	7.304	5.662
	6.373	6.402	6.781	5.93	6.376		6.963	6.003	6.818	6.493	7.299	5.672
	6.373	6.402	6.781	5.948	6.354		6.939	6.024	6.809	6.531	7.264	5.683
	6.389	6.406	6.781	5.958	6.354		6.937	6.024	6.79	6.531	7.264	5.69
	6.389	6.441	6.781	5.958	6.354		6.93	6.026	6.781	6.531	7.244	5.69
	6.402	6.441	6.781	5.972	6.347		6.927	6.028	6.754	6.541	7.236	5.697
	6.406	6.451	6.744	6	6.337		6.903	6.028	6.745	6.579	7.236	5.706
	6.406	6.451	6.735	6	6.334		6.902	6.032	6.745	6.579	7.212	5.706
	6.441	6.456	6.735	6.024	6.298		6.892	6.055	6.735	6.62	7.198	5.711
	6.441	6.483	6.732	6.028	6.284		6.882	6.058	6.735	6.642	7.165	5.712
	6.441	6.483	6.729	6.041	6.284		6.882	6.065	6.729	6.676	7.163	5.716
	6.48	6.493	6.71	6.041	6.245		6.882	6.065	6.72	6.698	7.125	5.723
	6.483	6.505	6.71	6.055	6.241		6.873	6.113	6.692	6.704	7.122	5.723
	6.531	6.505	6.645	6.055	6.228		6.858	6.12	6.692	6.744	7.117	5.738
	6.541	6.506	6.645	6.055	6.228		6.839	6.12	6.692	6.76	7.11	5.745
	6.569	6.509	6.635	6.058	6.228		6.806	6.12	6.682	6.767	7.11	5.745
	6.569	6.523	6.635	6.065	6.218		6.806	6.121	6.682	6.777	7.089	5.748
	6.569	6.528	6.63	6.065	6.214		6.794	6.123	6.682	6.781	7.081	5.748
	6.569	6.534	6.62	6.065	6.204		6.784	6.148	6.661	6.781	7.08	5.77
	6.591	6.541	6.62	6.065	6.204		6.781	6.19	6.642	6.781	7.077	5.774
	6.591	6.541	6.607	6.086	6.174		6.781	6.19	6.642	6.828	7.077	5.776
	6.607	6.557	6.531	6.086	6.167		6.76	6.19	6.642	6.839	7.077	5.777
	6.642	6.569	6.531	6.12	6.167		6.76	6.196	6.642	6.842	7.073	5.784
	6.645	6.579	6.531	6.123	6.151		6.754	6.204	6.642	6.882	7.073	5.799
	6.661	6.594	6.531	6.123	6.134		6.744	6.245	6.62	6.903	7.069	5.799
	6.67	6.595	6.531	6.137	6.134		6.735	6.272	6.591	6.903	7.034	5.802
	6.682	6.62	6.518	6.137	6.123		6.699	6.284	6.579	6.93	7.019	5.806
	6.682	6.621	6.518	6.151	6.123		6.698	6.301	6.579	6.936	6.984	5.806
	6.682	6.635	6.509	6.151	6.12		6.698	6.321	6.579	6.936	6.98	5.813
	6.682	6.642	6.493	6.167	6.12		6.676	6.321	6.569	6.939	6.98	5.836
	6.682	6.642	6.483	6.204	6.12		6.675	6.327	6.569	6.941	6.978	5.888
	6.692	6.645	6.48	6.204	6.12		6.663	6.327	6.531	6.963	6.974	5.892
	6.692	6.645	6.451	6.204	6.12		6.661	6.337	6.517	6.969	6.939	5.905
	6.692	6.661	6.451	6.214	6.113		6.661	6.337	6.509	6.978	6.936	5.916
	6.729	6.661	6.451	6.214	6.086		6.661	6.347	6.506	6.984	6.936	5.929
	6.732	6.661	6.451	6.218	6.086		6.652	6.347	6.506	6.997	6.903	5.929
	6.735	6.661	6.441	6.218	6.065		6.645	6.38	6.498	7.019	6.895	5.93
	6.781	6.661	6.406	6.218	6.065		6.645	6.398	6.493	7.034	6.881	5.93
	6.781	6.662	6.406	6.228	6.058		6.635	6.402	6.48	7.036	6.873	5.93
	6.781	6.668	6.406	6.241	6.055		6.598	6.406	6.47	7.046	6.858	5.941
	6.79	6.682	6.402	6.241	6.055		6.579	6.441	6.47	7.046	6.855	5.948
	6.79	6.682	6.402	6.258	6.028		6.579	6.451	6.451	7.051	6.842	5.948
	6.79	6.698	6.402	6.284	6.028		6.569	6.493	6.451	7.051	6.842	5.974
	6.809	6.72	6.376	6.284	6.024		6.569	6.506	6.404	7.081	6.842	5.974
	6.839	6.729	6.354	6.284	6.024		6.557	6.517	6.402	7.081	6.835	5.992
	6.842	6.735	6.347	6.298	6.024		6.551	6.518	6.389	7.105	6.833	6
	6.842	6.754	6.327	6.298	6.024		6.547	6.528	6.389	7.115	6.829	6.013
	6.842	6.757	6.324	6.327	6.024		6.531	6.528	6.373	7.125	6.818	6.024
	6.855	6.757	6.321	6.327	6.003		6.531	6.547	6.354	7.137	6.809	6.024
	6.858	6.781	6.321	6.337	6		6.528	6.557	6.354	7.14	6.79	6.028
	6.858	6.781	6.301	6.373	6		6.518	6.56	6.354	7.14	6.789	6.028
	6.858	6.789	6.298	6.373	6		6.518	6.569	6.337	7.143	6.78	6.055
	6.882	6.789	6.246	6.386	5.972		6.509	6.576	6.337	7.154	6.699	6.058
	6.882	6.79	6.245	6.389	5.958		6.509	6.579	6.337	7.186	6.692	6.065
	6.903	6.804	6.241	6.402	5.958		6.509	6.579	6.327	7.212	6.663	6.083
	6.903	6.809	6.241	6.402	5.958		6.483	6.62	6.325	7.212	6.661	6.088
	6.93	6.814	6.218	6.406	5.958		6.483	6.621	6.309	7.23	6.661	6.094
	6.93	6.839	6.218	6.406	5.958		6.483	6.663	6.298	7.23	6.661	6.108
	6.936	6.847	6.218	6.406	5.948		6.47	6.732	6.298	7.236	6.642	6.113
	6.936	6.881	6.214	6.406	5.948		6.455	6.735	6.298	7.29	6.642	6.12
	6.939	6.891	6.204	6.451	5.948		6.451	6.735	6.284	7.299	6.642	6.121
	6.939	6.903	6.204	6.48	5.948		6.451	6.735	6.27	7.304	6.642	6.123
	6.972	6.903	6.204	6.48	5.948		6.451	6.754	6.238	7.313	6.579	6.134
	6.978	6.97	6.167	6.493	5.948		6.409	6.757	6.228	7.313	6.56	6.137
	6.984	6.97	6.167	6.493	5.93		6.409	6.772	6.228	7.313	6.557	6.137
	7.019	6.978	6.137	6.506	5.93		6.406	6.781	6.228	7.324	6.547	6.137
	7.019	6.978	6.123	6.506	5.93		6.406	6.781	6.228	7.331	6.531	6.145
	7.034	6.98	6.123	6.506	5.93		6.389	6.781	6.218	7.344	6.531	6.165
	7.043	7.014	6.12	6.518	5.93		6.386	6.794	6.214	7.355	6.528	6.167
	7.096	7.034	6.113	6.518	5.93		6.368	6.809	6.194	7.355	6.528	6.204
	7.125	7.043	6.086	6.569	5.916		6.364	6.818	6.184	7.355	6.518	6.204
	7.14	7.046	6.086	6.569	5.916		6.337	6.818	6.174	7.355	6.509	6.204
	7.143	7.07	6.055	6.569	5.888		6.337	6.857	6.16	7.358	6.509	6.207
	7.163	7.081	6.041	6.579	5.884		6.331	6.858	6.145	7.362	6.506	6.207
	7.163	7.081	6.028	6.579	5.845		6.327	6.882	6.137	7.378	6.506	6.207
	7.186	7.081	6.028	6.579	5.845		6.284	6.891	6.135	7.417	6.48	6.212
	7.212	7.096	6.024	6.635	5.845		6.284	6.891	6.123	7.426	6.451	6.214
	7.212	7.127	6	6.635	5.845		6.276	6.903	6.121	7.439	6.406	6.218
	7.236	7.14	5.972	6.635	5.845		6.27	6.908	6.108	7.455	6.406	6.293
	7.236	7.14	5.958	6.642	5.842		6.27	6.927	6.088	7.482	6.39	6.298
	7.236	7.165	5.941	6.645	5.842		6.247	6.936	6.086	7.482	6.386	6.301
	7.244	7.175	5.93	6.645	5.842		6.215	6.936	6.086	7.49	6.373	6.327
	7.244	7.186	5.92	6.645	5.842		6.214	6.936	6.086	7.507	6.354	6.331
	7.281	7.206	5.92	6.645	5.835		6.204	6.948	6.065	7.541	6.331	6.347
	7.299	7.21	5.916	6.661	5.806		6.204	6.963	6.063	7.547	6.327	6.368
	7.299	7.21	5.916	6.67	5.806		6.204	6.978	6.058	7.548	6.324	6.386
	7.313	7.212	5.884	6.67	5.802		6.194	6.978	6.047	7.551	6.324	6.386
	7.313	7.212	5.884	6.67	5.799		6.151	6.984	6.041	7.559	6.301	6.388
	7.313	7.213	5.884	6.682	5.799		6.151	6.984	6.028	7.577	6.298	6.43
	7.324	7.218	5.884	6.682	5.777		6.137	6.985	6.024	7.581	6.298	6.43
	7.324	7.236	5.884	6.692	5.774		6.137	7.028	6.024	7.617	6.284	6.44
	7.344	7.244	5.874	6.729	5.774		6.137	7.034	6.005	7.638	6.252	6.441
	7.344	7.273	5.874	6.735	5.774		6.135	7.051	6	7.647	6.247	6.441
	7.355	7.281	5.874	6.744	5.77		6.128	7.081	5.972	7.664	6.246	6.451
	7.355	7.281	5.874	6.76	5.759		6.127	7.081	5.958	7.668	6.214	6.464
	7.355	7.281	5.842	6.781	5.759		6.123	7.081	5.948	7.699	6.214	6.47
	7.355	7.29	5.842	6.781	5.748		6.12	7.081	5.948	7.712	6.184	6.47
	7.355	7.305	5.842	6.781	5.745		6.113	7.091	5.941	7.755	6.167	6.474
	7.355	7.324	5.842	6.79	5.727		6.094	7.105	5.934	7.763	6.151	6.48
	7.355	7.328	5.806	6.79	5.716		6.088	7.127	5.93	7.769	6.135	6.493
	7.389	7.33	5.802	6.794	5.716		6.088	7.152	5.93	7.772	6.123	6.505
	7.392	7.355	5.77	6.818	5.716		6.088	7.186	5.93	7.808	6.123	6.506
	7.395	7.389	5.77	6.818	5.683		6.083	7.186	5.93	7.819	6.12	6.518
	7.417	7.391	5.77	6.839	5.683		6.055	7.21	5.918	7.851	6.086	6.528
	7.426	7.426	5.748	6.855	5.672		6.042	7.212	5.916	7.875	6.065	6.531
	7.426	7.445	5.745	6.858	5.672		6.041	7.218	5.888	7.88	6.058	6.531
	7.426	7.47	5.745	6.882	5.668		6.041	7.244	5.884	7.938	6.058	6.541
	7.445	7.482	5.727	6.882	5.668		6.026	7.244	5.884	7.939	6.055	6.547
	7.482	7.513	5.727	6.903	5.657		6.013	7.245	5.884	7.965	6.051	6.557
	7.482	7.551	5.716	6.924	5.657		6.005	7.264	5.86	7.966	6.051	6.569
	7.482	7.617	5.712	6.927	5.642		6.003	7.272	5.842	7.971	6.041	6.576
	7.507	7.647	5.69	6.927	5.602		6.001	7.304	5.842	7.98	6.041	6.579
	7.526	7.654	5.657	6.939	5.602		6	7.304	5.838	7.98	6.028	6.579
	7.548	7.668	5.642	6.963	5.602		5.972	7.305	5.835	8.078	6.021	6.579
	7.551	7.679	5.613	6.972	5.572		5.97	7.313	5.829	8.083	6	6.62
	7.559	7.694	5.613	6.978	5.568		5.93	7.324	5.806	8.124	5.958	6.62
	7.573	7.698	5.602	6.978	5.568		5.93	7.344	5.799	8.143	5.916	6.642
	7.581	7.755	5.568	6.984	5.549		5.929	7.344	5.799	8.152	5.916	6.642
	7.589	7.755	5.568	7.025	5.549		5.902	7.355	5.798	8.16	5.888	6.642
	7.617	7.763	5.549	7.07	5.549		5.874	7.355	5.777	8.17	5.888	6.645
	7.617	7.768	5.542	7.07	5.549		5.874	7.358	5.777	8.201	5.884	6.663
	7.647	7.768	5.512	7.07	5.542		5.874	7.361	5.777	8.211	5.845	6.669
	7.657	7.768	5.508	7.073	5.542		5.874	7.392	5.774	8.245	5.845	6.677
	7.698	7.772	5.489	7.081	5.523		5.856	7.393	5.774	8.261	5.806	6.692
	7.722	7.795	5.481	7.096	5.512		5.856	7.455	5.745	8.274	5.806	6.698
	7.741	7.808	5.443	7.105	5.512		5.851	7.455	5.745	8.284	5.774	6.708
	7.755	7.811	5.443	7.125	5.512		5.842	7.482	5.738	8.284	5.774	6.729
	7.755	7.819	5.443	7.137	5.512		5.836	7.484	5.727	8.324	5.759	6.735
	7.776	7.822	5.432	7.14	5.493		5.835	7.49	5.717	8.371	5.748	6.754
	7.795	7.828	5.42	7.14	5.493		5.835	7.5	5.716	8.371	5.716	6.764
	7.795	7.848	5.42	7.152	5.493		5.777	7.501	5.716	8.374	5.716	6.772
	7.811	7.872	5.401	7.163	5.493		5.777	7.557	5.69	8.411	5.716	6.781
	7.837	7.875	5.39	7.186	5.493		5.774	7.573	5.69	8.411	5.683	6.781
	7.872	7.882	5.39	7.21	5.489		5.774	7.573	5.683	8.446	5.668	6.784
	7.875	7.95	5.386	7.212	5.489		5.77	7.589	5.67	8.453	5.657	6.802
	7.882	7.954	5.366	7.23	5.443		5.759	7.638	5.657	8.453	5.628	6.805
	7.922	7.956	5.355	7.236	5.42		5.748	7.638	5.651	8.453	5.602	6.809
	7.922	7.966	5.355	7.236	5.401		5.748	7.639	5.642	8.512	5.595	6.842
	7.922	7.966	5.32	7.236	5.401		5.745	7.666	5.642	8.558	5.595	6.842
	7.946	8	5.32	7.236	5.401		5.745	7.678	5.636	8.57	5.568	6.846
	7.946	8.021	5.32	7.299	5.39		5.723	7.684	5.636	8.58	5.568	6.852
	7.959	8.022	5.32	7.313	5.386		5.716	7.712	5.572	8.61	5.568	6.855
	7.959	8.037	5.308	7.344	5.386		5.716	7.755	5.568	8.623	5.549	6.858
	7.959	8.05	5.304	7.355	5.386		5.706	7.755	5.553	8.629	5.549	6.858
	7.966	8.05	5.296	7.355	5.386		5.692	7.768	5.549	8.629	5.549	6.876
	7.966	8.083	5.296	7.369	5.386		5.692	7.783	5.549	8.645	5.549	6.882
	7.98	8.122	5.265	7.372	5.386		5.69	7.808	5.549	8.674	5.549	6.891
	7.98	8.124	5.265	7.414	5.366		5.67	7.837	5.542	8.69	5.508	6.903
	8.016	8.124	5.245	7.426	5.355		5.668	7.837	5.526	8.692	5.493	6.903
	8.07	8.146	5.245	7.426	5.355		5.668	7.848	5.512	8.754	5.493	6.908
	8.099	8.193	5.225	7.445	5.339		5.662	7.872	5.508	8.763	5.489	6.936
	8.099	8.213	5.225	7.482	5.32		5.642	7.912	5.493	8.766	5.47	6.939
	8.122	8.224	5.225	7.482	5.308		5.628	7.938	5.493	8.772	5.443	6.941
	8.124	8.251	5.225	7.482	5.308		5.615	7.946	5.493	8.8	5.432	6.956
	8.129	8.255	5.202	7.484	5.308		5.602	7.95	5.493	8.815	5.429	6.969
	8.152	8.364	5.201	7.501	5.304		5.602	8	5.493	8.829	5.42	6.972
	8.163	8.386	5.201	7.501	5.292		5.549	8.016	5.489	8.838	5.42	6.974
	8.165	8.401	5.201	7.501	5.265		5.549	8.078	5.489	8.857	5.401	6.978
	8.201	8.531	5.193	7.507	5.265		5.526	8.124	5.481	8.857	5.399	6.978
	8.213	8.541	5.161	7.548	5.245		5.516	8.143	5.474	8.87	5.39	6.984
	8.304	8.544	5.161	7.573	5.225		5.493	8.143	5.457	8.941	5.39	6.988
	8.307	8.566	5.149	7.573	5.225		5.481	8.16	5.457	8.976	5.39	6.989
	8.334	8.578	5.137	7.592	5.213		5.481	8.175	5.443	8.978	5.39	7.006
	8.371	8.606	5.116	7.617	5.201		5.477	8.18	5.443	8.978	5.386	7.007
	8.374	8.674	5.112	7.638	5.165		5.456	8.183	5.432	8.997	5.339	7.019
	8.374	8.722	5.112	7.668	5.165		5.432	8.201	5.42	9.006	5.339	7.019
	8.386	8.772	5.104	7.679	5.161		5.432	8.206	5.406	9.018	5.339	7.025
	8.386	8.774	5.09	7.712	5.161		5.429	8.212	5.356	9.036	5.339	7.062
	8.386	8.774	5.067	7.722	5.149		5.42	8.265	5.355	9.061	5.32	7.07
	8.411	8.781	5.067	7.741	5.149		5.42	8.334	5.355	9.076	5.32	7.105
	8.433	8.781	5.051	7.741	5.149		5.42	8.364	5.355	9.098	5.32	7.117
	8.453	8.781	5.051	7.755	5.137		5.415	8.366	5.339	9.131	5.32	7.122
	8.492	8.814	5.047	7.755	5.116		5.386	8.371	5.339	9.133	5.312	7.125
	8.512	8.857	5.038	7.763	5.116		5.366	8.371	5.339	9.161	5.304	7.137
	8.522	8.906	5.038	7.795	5.112		5.355	8.386	5.339	9.164	5.304	7.165
	8.66	8.911	5.038	7.811	5.1		5.355	8.485	5.32	9.17	5.304	7.181
	8.722	8.941	5.038	7.819	5.1		5.355	8.497	5.308	9.232	5.229	7.186
	8.76	8.985	5.001	7.819	5.1		5.339	8.507	5.308	9.272	5.229	7.186
	8.8	8.985	4.98	7.848	5.051		5.339	8.558	5.303	9.377	5.225	7.186
	8.808	8.997	4.98	7.851	5.038		5.32	8.585	5.237	9.393	5.225	7.188
	8.838	9.006	4.98	7.875	5.038		5.32	8.674	5.201	9.41	5.202	7.198
	8.962	9.013	4.98	7.882	5.038		5.32	8.716	5.197	9.483	5.201	7.202
	8.969	9.031	4.98	7.966	5.001		5.32	8.774	5.165	9.521	5.201	7.207
	8.976	9.098	4.968	7.966	4.98		5.32	8.789	5.165	9.56	5.201	7.212
	8.978	9.15	4.968	7.966	4.964		5.304	8.789	5.163	9.579	5.161	7.212
	9.013	9.162	4.964	8	4.938		5.304	8.789	5.161	9.614	5.149	7.218
	9.054	9.198	4.938	8.016	4.934		5.292	8.81	5.149	9.623	5.135	7.219
	9.054	9.236	4.934	8.016	4.93		5.292	8.876	5.137	9.626	5.122	7.219
	9.098	9.304	4.934	8.07	4.93		5.265	8.948	5.112	9.626	5.116	7.238
	9.205	9.324	4.913	8.07	4.913		5.229	8.948	5.1	9.629	5.116	7.272
	9.236	9.344	4.9	8.124	4.913		5.225	8.985	5.067	9.633	5.116	7.294
	9.313	9.386	4.866	8.16	4.913		5.225	8.985	5.065	9.642	5.112	7.299
	9.322	9.404	4.849	8.17	4.9		5.213	8.985	5.047	9.658	5.1	7.313
	9.362	9.404	4.849	8.224	4.9		5.213	9.031	5.047	9.674	5.1	7.313
	9.384	9.413	4.815	8.224	4.896		5.213	9.032	5.038	9.705	5.067	7.314
	9.404	9.45	4.815	8.324	4.866		5.201	9.034	5.029	9.74	5.029	7.328
	9.45	9.45	4.815	8.327	4.866		5.201	9.169	5.014	9.813	5.018	7.344
	9.492	9.483	4.802	8.374	4.866		5.201	9.189	5.014	9.814	5.004	7.345
	9.59	9.51	4.762	8.374	4.849		5.201	9.198	4.975	9.814	5.001	7.347
	9.59	9.551	4.732	8.374	4.836		5.201	9.205	4.966	9.86	4.98	7.355
	9.623	9.649	4.732	8.386	4.836		5.198	9.216	4.964	9.951	4.98	7.355
	9.629	9.692	4.713	8.404	4.815		5.186	9.243	4.938	9.963	4.942	7.357
	9.672	9.698	4.71	8.404	4.815		5.165	9.25	4.938	10.004	4.934	7.358
	9.674	9.847	4.696	8.411	4.815		5.161	9.25	4.934	10.049	4.913	7.366
	9.726	9.904	4.652	8.411	4.78		5.161	9.279	4.93	10.069	4.896	7.368
	9.762	9.927	4.652	8.446	4.776		5.152	9.31	4.93	10.093	4.896	7.369
	9.794	9.936	4.652	8.453	4.776		5.137	9.313	4.93	10.233	4.896	7.369
	9.8	9.961	4.616	8.463	4.762		5.135	9.324	4.929	10.243	4.889	7.392
	9.826	9.961	4.602	8.485	4.762		5.122	9.331	4.907	10.246	4.849	7.392
	9.927	10.002	4.562	8.492	4.758		5.118	9.344	4.904	10.274	4.794	7.414
	9.927	10.004	4.562	8.502	4.745		5.116	9.393	4.856	10.342	4.776	7.426
	9.971	10.028	4.53	8.512	4.745		5.116	9.442	4.846	10.383	4.776	7.439
	10.102	10.046	4.53	8.522	4.71		5.112	9.516	4.802	10.388	4.762	7.445
	10.2	10.046	4.53	8.522	4.71		5.107	9.626	4.78	10.402	4.758	7.47
	10.202	10.12	4.516	8.578	4.692		5.1	9.649	4.78	10.413	4.745	7.482
	10.273	10.145	4.516	8.609	4.661		5.1	9.698	4.78	10.453	4.711	7.49
	10.316	10.26	4.507	8.679	4.656		5.093	9.764	4.78	10.639	4.71	7.5
	10.412	10.294	4.493	8.679	4.652		5.09	9.845	4.737	10.665	4.696	7.507
	10.426	10.304	4.493	8.698	4.652		5.09	9.896	4.715	10.737	4.696	7.523
	10.454	10.305	4.474	8.732	4.625		5.067	9.936	4.711	10.766	4.692	7.523
	10.502	10.305	4.474	8.774	4.625		5.067	9.998	4.71	10.772	4.656	7.523
	10.515	10.444	4.455	8.774	4.625		5.052	10.038	4.661	10.902	4.639	7.527
	10.602	10.531	4.455	8.81	4.625		5.051	10.055	4.655	10.907	4.625	7.542
	10.61	10.539	4.413	8.81	4.616		5.031	10.135	4.602	10.95	4.62	7.547
	10.616	10.579	4.404	8.85	4.584		5.016	10.163	4.597	11.131	4.614	7.579
	10.688	10.848	4.327	8.857	4.584		5.007	10.202	4.584	11.183	4.602	7.581
	10.737	10.864	4.327	8.857	4.584		5.001	10.243	4.582	11.226	4.584	7.592
	10.797	11.021	4.327	8.894	4.562		4.997	10.259	4.578	11.255	4.532	7.598
	10.866	11.163	4.303	8.943	4.562		4.975	10.297	4.565	11.311	4.532	7.617
	10.881	11.22	4.303	8.962	4.562		4.974	10.299	4.562	11.316	4.493	7.617
	10.957	11.25	4.289	8.969	4.53		4.938	10.38	4.546	11.411	4.493	7.647
	11.016	11.266	4.245	8.969	4.53		4.929	10.402	4.532	11.492	4.474	7.647
	11.024	11.372	4.221	8.985	4.516		4.924	10.428	4.532	11.55	4.394	7.655
	11.024	11.521	4.206	9.054	4.507		4.919	10.444	4.507	11.553	4.394	7.665
	11.033	11.529	4.206	9.107	4.507		4.913	10.444	4.507	11.772	4.394	7.665
	11.25	11.552	4.131	9.164	4.507		4.913	10.531	4.493	11.881	4.394	7.668
	11.285	12.001	4.126	9.18	4.479		4.913	10.531	4.493	12	4.38	7.668
	11.316	12.031	4.105	9.189	4.479		4.907	10.593	4.474	12.011	4.338	7.713
	11.484	12.353	4.08	9.225	4.479		4.866	10.688	4.469	12.077	4.336	7.755
	11.685	12.359	3.94	9.236	4.474		4.849	10.75	4.455	12.57	4.311	7.755
	11.685	12.395	3.924	9.304	4.474		4.849	10.827	4.394	12.588	4.303	7.768
	11.69	12.811	3.897	9.313	4.474		4.849	10.864	4.394	12.595	4.289	7.768
	11.721	13.186	3.897	9.342	4.474		4.848	10.948	4.337	12.805	4.284	7.819
	11.839	14.835	3.881	9.362	4.474		4.786	10.957	4.336	13.011	4.284	7.819
	11.843		3.833	9.393	4.474		4.78	11.041	4.303	13.223	4.245	7.822
	11.869		3.795	9.419	4.474		4.78	11.116	4.303	13.325	4.206	7.837
	11.939		3.795	9.433	4.455		4.77	11.424	4.276	13.484	4.127	7.848
	11.953		3.762	9.463	4.413		4.762	11.431	4.26	14.874	4.11	7.872
	12.043		3.745	9.51	4.413		4.762	11.513	4.248	14.942	4.08	7.872
	12.247		3.695	9.579	4.404		4.762	11.82	4.248	15.146	4.065	7.872
	12.456		3.688	9.59	4.404		4.746	11.974	4.237	15.262	4.046	7.873
	13.41		3.678	9.649	4.404		4.745	12.172	4.23	16.012	4.006	7.882
			3.649	9.677	4.394		4.737	12.175	4.206	16.517	3.876	7.894
			3.643	9.717	4.394		4.737	12.429	4.206	16.664	3.876	7.949
			3.632	9.794	4.38		4.737	12.444	4.206	20.543	3.839	7.95
			3.609	9.954	4.38		4.719	12.878	4.206	21.5	3.833	7.955
			3.603	9.971	4.337		4.713	12.91	4.166		3.829	7.956
			3.569	10.002	4.327		4.71	12.966	4.08		3.788	7.959
			3.563	10.015	4.323		4.71	13.274	4.054		3.762	7.966
			3.522	10.038	4.323		4.71	13.36	4.046		3.696	7.971
			3.522	10.064	4.323		4.656	13.54	3.961		3.672	7.979
			3.51	10.102	4.303		4.599	13.726	3.94		3.649	7.998
			3.495	10.147	4.289		4.599	14.052	3.931		3.582	8.029
			3.474	10.245	4.289		4.589	15.418	3.919		3.558	8.032
			3.462	10.267	4.26		4.584	17.37	3.911		3.555	8.037
			3.42	10.291	4.245		4.58	17.971	3.871		3.428	8.051
			3.377	10.297	4.245		4.565		3.856		3.337	8.061
			3.364	10.358	4.206		4.546		3.849		3.264	8.078
			3.27	10.404	4.206		4.538		3.833		2.899	8.093
			3.264	10.444	4.206		4.53		3.811		2.633	8.122
			3.193	10.49	4.206		4.516		3.776			8.124
			3.06	10.492	4.206		4.514		3.745			8.129
			3.06	10.502	4.186		4.507		3.724			8.132
			3.06	10.581	4.131		4.493		3.696			8.193
			2.841	10.584	4.131		4.493		3.695			8.193
			2.556	10.626	4.126		4.488		3.649			8.193
				10.674	4.1		4.48		3.619			8.197
				10.71	4.1		4.479		3.563			8.224
				10.772	4.1		4.474		3.547			8.224
				10.845	4.08		4.474		3.492			8.224
				10.86	4.049		4.474		3.486			8.224
				10.997	4.049		4.474		3.468			8.224
				11.024	4.039		4.455		3.364			8.224
				11.041	4.039		4.45		3.357			8.251
				11.419	4.018		4.444		3.289			8.261
				11.453	3.961		4.428		3.27			8.324
				11.554	3.94		4.417		3.249			8.327
				11.612	3.924		4.382		3.147			8.332
				11.769	3.919		4.327		3.044			8.37
				11.885	3.897		4.323		2.841			8.374
				11.981	3.881		4.323		2.841			8.385
				12.194	3.876		4.305		2.471			8.386
				12.274	3.871		4.284					8.386
				12.33	3.833		4.284					8.386
				13.158	3.833		4.26					8.411
				13.572	3.811		4.245					8.442
				13.723	3.75		4.245					8.449
				13.873	3.678		4.245					8.453
				13.878	3.678		4.221					8.453
				13.945	3.609		4.221					8.477
				13.999	3.569		4.206					8.495
				14.136	3.522		4.206					8.502
				14.251	3.51		4.201					8.504
				14.303	3.51		4.201					8.515
				14.688	3.51		4.186					8.519
				14.942	3.492		4.186					8.522
				15.06	3.474		4.126					8.522
				15.233	3.468		4.1					8.539
				15.504	3.468		4.084					8.544
				15.59	3.395		4.08					8.58
				15.616	3.377		4.08					8.58
				15.713	3.321		4.049					8.603
				15.724	3.321		4.049					8.607
				15.756	3.321		4.039					8.646
				15.87	3.321		4.024					8.655
				15.933	3.321		3.99					8.657
				16.569	3.289		3.945					8.686
				16.739	3.264		3.926					8.695
					3.167		3.859					8.715
					3.167		3.839					8.732
					3.114		3.829					8.766
					3.114		3.811					8.781
					3.06		3.811					8.8
					3.012		3.758					8.806
					3.012		3.745					8.822
					2.885		3.723					8.866
					2.683		3.678					8.87
					2.207		3.678					8.911
							3.615					8.948
							3.533					8.96
							3.514					8.985
							3.474					9.061
							3.436					9.085
							3.395					9.098
							3.377					9.123
							3.343					9.15
							3.321					9.162
							3.289					9.162
							3.226					9.25
							3.193					9.25
							3.087					9.265
							2.918					9.36
							2.683					9.393
												9.41
												9.419
												9.487
												9.623
												9.684
												9.831
												9.847
												9.877
												9.972
												10.046
												10.058
												10.078
												10.079
												10.095
												10.109
												10.211
												10.245
												10.259
												10.259
												10.267
												10.276
												10.364
												10.372
												10.388
												10.418
												10.424
												10.543
												10.556
												10.57
												10.657
												10.698
												10.719
												10.817
												10.866
												10.925
												11.093
												11.166
												11.249
												11.251
												11.366
												11.366
												11.492
												11.672
												11.682
												11.806
												11.818
												11.992
												12
												12.024
												12.042
												12.557
												12.59
												12.706
												12.728
												12.768
												12.788
												12.998
												13.134
												13.975
												14.214
												14.264
												14.655
												16.112
												16.129
												16.163
												17.899
												18.083
	siSCR	siMACF1,1	siMACF1,2	siMACF1,3	siMACF1,mix		shSCR	shMACF1,1	shMACF1,2	shMACF1,3	shMACF1,4	shMACF1,mix
	6.676	6.563	6.406	6.406	5.939	Median	6.337	6.337	6.389	6.936	6.9195	6.531
	1.91318	1.94905	1.91232	2.60007	1.90633	SD	1.98313	2.3071	1.94898	2.58286	2.28634	2.26302
	0.0898891	0.0923936	0.087559	0.114131	0.0828837	SEM	0.085026	0.106646	0.0911692	0.119012	0.105349	0.104274

## Sheet: 2B
	SiRNA experiments						ShRNA experiments
Myonuclei ferret	siSCR	siMACF1,1	siMACF1,2	siMACF1,3	siMACF1,mix		shSCR	shMACF1,1	shMACF1,2	shMACF1,3	shMACF1,4	shMACF1,mix
	6.948	19.281	5.287	20.4	5.672		24.777	6.184	19.05	5.385	19.813	6.76
data obtained from 3 individual experiments	7.49	19.019	5.715	19.5	6.058		19.436	6.557	18.602	5.827	17.006	6.781
	7.647	18.059	5.842	17.525	6.483		18.849	6.645	16.888	6.123	16.131	7.143
	7.722	16.474	5.965	16.664	6.682		18.702	7.105	16.444	6.402	15.898	7.414
	7.819	16.394	5.969	16.367	6.842		18.078	7.647	16.179	6.744	15.76	7.573
	7.966	16.331	6.151	15.973	7.07		17.805	7.956	15.629	7.152	15.644	7.725
	8.254	16.321	6.261	15.959	7.125		17.748	7.956	15.005	7.313	15.305	7.755
	8.371	15.933	6.327	15.913	7.137		17.526	8.091	15.003	7.429	15.027	7.768
	8.374	15.835	6.585	15.858	7.212		17.34	8.091	14.925	7.47	14.815	7.946
	8.411	15.804	6.715	15.835	7.299		16.966	8.152	14.914	7.482	14.716	7.946
	8.568	15.777	6.738	15.646	7.304		16.769	8.177	14.862	7.551	14.711	7.956
	8.66	15.628	6.79	15.603	7.313		16.739	8.201	14.815	7.57	14.5	8.16
	8.715	15.614	6.818	15.441	7.389		16.382	8.329	14.351	7.698	14.405	8.324
	8.763	15.536	6.858	15.115	7.426		16.321	8.366	14.28	7.725	14.398	8.334
	8.8	15.419	6.963	14.875	7.482		16.306	8.411	14.242	7.795	14.258	8.371
	8.829	15.38	6.978	14.5	7.507		16.248	8.411	14.167	7.938	14.192	8.386
	8.85	15.29	6.984	14.489	7.507		16.182	8.452	14.113	7.946	14.1	8.386
	8.885	15.178	7.019	14.449	7.573		16.064	8.522	14.035	7.956	13.929	8.446
	8.887	15.162	7.117	14.444	7.617		16.003	8.66	13.999	8.045	13.896	8.463
	9.018	15.118	7.355	14.363	7.768		16.001	8.715	13.963	8.045	13.755	8.496
	9.054	15.046	7.417	14.324	7.768		15.933	8.732	13.926	8.203	13.715	8.522
	9.116	15.036	7.482	14.281	7.776		15.871	8.763	13.768	8.243	13.704	8.522
	9.225	14.976	7.607	14.264	7.875		15.835	8.8	13.685	8.276	13.692	8.57
	9.272	14.976	7.617	14.251	7.88		15.765	8.801	13.625	8.292	13.692	8.57
	9.304	14.893	7.647	14.251	7.935		15.708	8.888	13.619	8.307	13.685	8.578
	9.306	14.871	7.656	14.077	8.05		15.496	8.976	13.501	8.327	13.581	8.609
	9.324	14.858	7.679	14.077	8.083		15.496	8.978	13.484	8.327	13.563	8.66
	9.342	14.815	7.809	14.064	8.163		15.489	9.018	13.436	8.402	13.509	8.789
	9.386	14.774	7.809	14.052	8.17		15.358	9.034	13.416	8.453	13.503	8.829
	9.386	14.759	7.819	14.052	8.193		15.322	9.034	13.41	8.544	13.436	8.887
	9.404	14.6	7.851	13.993	8.211		15.184	9.036	13.34	8.568	13.201	8.911
	9.404	14.415	7.875	13.945	8.224		15.163	9.089	13.266	8.679	13.191	8.978
	9.433	14.403	7.935	13.929	8.284		15.102	9.107	13.26	8.707	12.968	9.013
	9.49	14.332	7.959	13.873	8.304		15.003	9.109	13.234	8.715	12.966	9.031
	9.516	14.316	7.98	13.841	8.307		14.976	9.164	13.161	8.763	12.878	9.036
	9.608	14.299	8.011	13.767	8.307		14.893	9.182	13.142	8.774	12.858	9.098
	9.614	14.258	8.08	13.734	8.324		14.875	9.189	13.128	8.923	12.854	9.144
	9.614	14.235	8.122	13.692	8.324		14.837	9.205	13.018	8.948	12.78	9.2
	9.623	14.113	8.16	13.692	8.327		14.815	9.236	12.999	8.948	12.722	9.232
	9.629	14.113	8.261	13.641	8.426		14.804	9.243	12.982	9.031	12.677	9.243
	9.672	14.1	8.261	13.636	8.485		14.802	9.312	12.974	9.054	12.645	9.304
	9.692	14.077	8.261	13.589	8.512		14.736	9.498	12.974	9.059	12.569	9.304
	9.694	14.052	8.374	13.503	8.512		14.711	9.51	12.91	9.161	12.564	9.342
	9.698	13.999	8.374	13.49	8.524		14.701	9.514	12.876	9.169	12.551	9.35
	9.717	13.994	8.386	13.449	8.578		14.626	9.52	12.867	9.205	12.526	9.36
	9.726	13.994	8.386	13.429	8.58		14.604	9.525	12.858	9.306	12.516	9.463
	9.752	13.975	8.386	13.342	8.58		14.588	9.538	12.854	9.377	12.516	9.538
	9.774	13.945	8.401	13.323	8.667		14.524	9.551	12.805	9.393	12.489	9.555
	9.792	13.944	8.433	13.321	8.679		14.518	9.554	12.792	9.397	12.361	9.59
	9.792	13.935	8.446	13.316	8.732		14.497	9.562	12.787	9.397	12.323	9.623
	9.794	13.923	8.49	13.304	8.732		14.488	9.58	12.746	9.423	12.316	9.623
	9.794	13.903	8.49	13.299	8.781		14.488	9.614	12.728	9.43	12.284	9.666
	9.794	13.896	8.502	13.287	8.8		14.449	9.666	12.689	9.45	12.267	9.672
	9.8	13.896	8.522	13.285	8.906		14.419	9.692	12.677	9.494	12.194	9.726
	9.813	13.885	8.522	13.284	8.969		14.299	9.717	12.663	9.497	12.172	9.769
	9.845	13.872	8.541	13.274	8.978		14.28	9.752	12.63	9.501	12.172	9.777
	9.847	13.791	8.578	13.271	8.985		14.28	9.762	12.579	9.551	12.164	9.796
	9.868	13.764	8.578	13.266	8.997		14.251	9.792	12.579	9.582	12.122	9.809
	9.87	13.759	8.58	13.262	9.006		14.235	9.826	12.571	9.631	12.11	9.809
	9.877	13.753	8.591	13.236	9.034		14.17	9.896	12.569	9.642	12.043	9.845
	9.887	13.741	8.591	13.235	9.036		14.163	9.984	12.526	9.672	12.043	9.935
	9.935	13.741	8.6	13.229	9.061		14.148	10.004	12.489	9.674	12.043	9.935
	9.965	13.692	8.607	13.229	9.098		14.148	10.102	12.471	9.692	11.994	9.95
	10.004	13.682	8.66	13.222	9.109		14.145	10.128	12.467	9.717	11.887	9.963
	10.004	13.65	8.679	13.191	9.123		14.129	10.128	12.459	9.847	11.883	9.998
	10.015	13.645	8.698	13.161	9.123		14.117	10.13	12.451	9.868	11.881	10.004
	10.046	13.618	8.763	13.161	9.169		14.089	10.218	12.446	9.905	11.834	10.004
	10.097	13.608	8.797	13.134	9.18		14.089	10.224	12.409	9.907	11.827	10.004
	10.13	13.54	8.808	13.128	9.205		14.021	10.243	12.409	9.954	11.786	10.004
	10.135	13.484	8.81	13.115	9.232		14.021	10.245	12.403	9.965	11.715	10.029
	10.145	13.47	8.831	13.108	9.236		14.011	10.286	12.392	9.979	11.678	10.035
	10.153	13.466	8.838	13.108	9.243		13.999	10.286	12.359	10.004	11.657	10.038
	10.163	13.373	8.857	13.085	9.25		13.994	10.291	12.33	10.012	11.635	10.093
	10.163	13.366	8.857	13.062	9.279		13.969	10.297	12.33	10.046	11.626	10.102
	10.186	13.323	8.857	13.033	9.306		13.968	10.297	12.325	10.046	11.547	10.163
	10.186	13.323	8.885	13.018	9.322		13.963	10.3	12.282	10.102	11.54	10.2
	10.2	13.316	8.894	13.011	9.342		13.963	10.358	12.274	10.114	11.513	10.224
	10.224	13.284	8.898	12.986	9.386		13.903	10.364	12.274	10.128	11.506	10.243
	10.243	13.266	8.906	12.986	9.386		13.896	10.386	12.24	10.135	11.486	10.291
	10.243	13.26	8.937	12.974	9.393		13.875	10.389	12.201	10.147	11.479	10.297
	10.251	13.26	8.978	12.974	9.419		13.863	10.404	12.162	10.233	11.44	10.299
	10.267	13.24	8.978	12.966	9.43		13.86	10.412	12.14	10.245	11.38	10.324
	10.291	13.229	8.978	12.936	9.45		13.815	10.416	12.12	10.291	11.329	10.349
	10.299	13.229	8.985	12.902	9.463		13.791	10.444	12.12	10.297	11.299	10.402
	10.316	13.191	9.018	12.883	9.492		13.753	10.454	12.12	10.299	11.287	10.412
	10.334	13.183	9.031	12.879	9.492		13.741	10.502	12.084	10.302	11.266	10.42
	10.364	13.128	9.034	12.846	9.492		13.638	10.554	12.083	10.324	11.203	10.426
	10.396	13.115	9.054	12.846	9.562		13.619	10.579	12.077	10.342	11.168	10.45
	10.402	13.083	9.054	12.839	9.562		13.618	10.608	12.064	10.342	11.147	10.454
	10.402	13.034	9.098	12.811	9.59		13.608	10.649	12.064	10.372	11.131	10.531
	10.404	13.013	9.143	12.811	9.623		13.608	10.686	12.055	10.39	11.093	10.539
	10.406	13.013	9.152	12.781	9.623		13.608	10.706	12.016	10.416	11.086	10.539
	10.444	13.011	9.153	12.78	9.649		13.563	10.732	12.012	10.42	11.042	10.608
	10.45	13.011	9.162	12.772	9.674		13.54	10.737	11.994	10.426	10.98	10.649
	10.49	12.994	9.18	12.723	9.698		13.509	10.773	11.974	10.427	10.921	10.649
	10.502	12.942	9.2	12.723	9.698		13.503	10.797	11.939	10.436	10.912	10.657
	10.514	12.918	9.216	12.689	9.726		13.49	10.808	11.927	10.451	10.881	10.68
	10.539	12.878	9.252	12.629	9.762		13.458	10.814	11.895	10.489	10.875	10.688
	10.592	12.878	9.279	12.618	9.777		13.453	10.841	11.885	10.502	10.808	10.688
	10.592	12.878	9.29	12.617	9.792		13.435	10.843	11.883	10.531	10.772	10.696
	10.639	12.878	9.29	12.617	9.8		13.435	10.85	11.876	10.531	10.68	10.708
	10.639	12.858	9.304	12.584	9.8		13.424	10.864	11.869	10.61	10.649	10.71
	10.649	12.858	9.36	12.583	9.809		13.422	10.866	11.869	10.649	10.545	10.737
	10.649	12.854	9.367	12.569	9.811		13.387	10.878	11.869	10.678	10.539	10.75
	10.678	12.846	9.386	12.557	9.813		13.366	10.881	11.857	10.704	10.458	10.75
	10.678	12.839	9.386	12.551	9.826		13.299	10.921	11.828	10.71	10.389	10.754
	10.789	12.805	9.404	12.524	9.845		13.284	10.948	11.806	10.733	10.324	10.779
	10.827	12.781	9.404	12.471	9.853		13.26	10.997	11.806	10.737	10.324	10.789
	10.841	12.735	9.408	12.471	9.86		13.26	11.014	11.776	10.755	10.291	10.827
	10.843	12.723	9.408	12.459	9.86		13.26	11.018	11.772	10.773	10.263	10.843
	10.85	12.723	9.419	12.456	9.86		13.26	11.032	11.721	10.797	10.245	10.858
	10.857	12.707	9.419	12.436	9.877		13.236	11.033	11.599	10.812	10.233	10.86
	10.86	12.697	9.49	12.434	9.877		13.236	11.033	11.599	10.814	10.186	10.881
	10.906	12.697	9.492	12.429	9.896		13.236	11.041	11.544	10.82	10.079	10.902
	10.912	12.689	9.497	12.424	9.896		13.115	11.041	11.54	10.827	10.077	10.934
	10.938	12.674	9.51	12.424	9.904		13.07	11.046	11.513	10.86	10.048	10.957
	10.948	12.663	9.516	12.409	9.927		13.062	11.066	11.506	10.86	10.046	10.978
	10.957	12.655	9.525	12.409	9.935		13.034	11.136	11.506	10.864	10.035	10.986
	10.967	12.648	9.56	12.404	9.935		13.034	11.136	11.498	10.921	10.035	11.024
	10.997	12.645	9.562	12.389	9.948		13.019	11.144	11.489	10.924	10.004	11.024
	11.003	12.584	9.579	12.377	9.961		13.013	11.16	11.44	10.936	10.002	11.033
	11.024	12.584	9.59	12.348	9.963		12.994	11.185	11.404	10.957	10	11.041
	11.032	12.569	9.642	12.325	9.963		12.994	11.197	11.341	10.957	9.904	11.041
	11.033	12.551	9.656	12.284	9.979		12.981	11.2	11.314	10.967	9.868	11.057
	11.041	12.551	9.665	12.282	10.002		12.96	11.203	11.227	10.986	9.865	11.131
	11.041	12.551	9.692	12.257	10.004		12.955	11.216	11.203	10.986	9.826	11.175
	11.042	12.551	9.694	12.242	10.015		12.904	11.25	11.16	11.014	9.813	11.175
	11.042	12.542	9.698	12.226	10.015		12.902	11.252	11.136	11.024	9.803	11.183
	11.046	12.526	9.698	12.221	10.015		12.892	11.313	11.132	11.108	9.8	11.22
	11.063	12.504	9.698	12.212	10.015		12.865	11.314	11.112	11.124	9.794	11.251
	11.116	12.504	9.698	12.203	10.015		12.805	11.329	11.099	11.127	9.732	11.252
	11.116	12.499	9.713	12.175	10.046		12.781	11.397	11.093	11.136	9.692	11.266
	11.144	12.471	9.717	12.162	10.077		12.753	11.41	11.041	11.136	9.692	11.331
	11.147	12.464	9.726	12.09	10.097		12.746	11.431	11.032	11.144	9.603	11.331
	11.16	12.444	9.732	12.088	10.097		12.728	11.442	10.997	11.175	9.597	11.375
	11.168	12.429	9.757	12.036	10.128		12.723	11.454	10.978	11.175	9.525	11.38
	11.168	12.424	9.772	12.002	10.13		12.709	11.469	10.957	11.2	9.51	11.404
	11.203	12.411	9.799	11.974	10.145		12.702	11.489	10.935	11.22	9.492	11.44
	11.204	12.409	9.81	11.974	10.145		12.697	11.489	10.881	11.226	9.404	11.469
	11.206	12.389	9.813	11.91	10.147		12.694	11.503	10.864	11.255	9.393	11.469
	11.22	12.348	9.826	11.881	10.153		12.684	11.53	10.841	11.264	9.362	11.516
	11.222	12.348	9.874	11.877	10.153		12.645	11.556	10.828	11.266	9.327	11.549
	11.226	12.325	9.877	11.871	10.163		12.602	11.571	10.814	11.311	9.268	11.556
	11.226	12.316	9.896	11.869	10.233		12.59	11.598	10.789	11.338	9.252	11.578
	11.237	12.284	9.927	11.869	10.245		12.584	11.612	10.752	11.339	9.236	11.612
	11.237	12.282	9.948	11.869	10.251		12.584	11.63	10.75	11.385	9.182	11.626
	11.248	12.282	9.954	11.86	10.291		12.579	11.642	10.68	11.393	9.18	11.626
	11.25	12.257	9.954	11.843	10.291		12.551	11.644	10.661	11.403	9.169	11.63
	11.251	12.247	9.961	11.839	10.291		12.539	11.657	10.599	11.404	9.061	11.63
	11.264	12.24	9.965	11.834	10.297		12.526	11.669	10.579	11.417	9.054	11.63
	11.264	12.24	9.996	11.828	10.299		12.516	11.678	10.565	11.424	8.997	11.63
	11.285	12.201	9.998	11.827	10.31		12.511	11.678	10.545	11.426	8.969	11.657
	11.287	12.194	10.015	11.82	10.316		12.511	11.678	10.531	11.44	8.838	11.678
	11.293	12.194	10.029	11.818	10.322		12.482	11.713	10.531	11.44	8.788	11.706
	11.294	12.172	10.035	11.801	10.324		12.482	11.715	10.525	11.442	8.699	11.706
	11.294	12.167	10.054	11.77	10.342		12.451	11.715	10.426	11.484	8.6	11.756
	11.316	12.148	10.071	11.744	10.364		12.444	11.742	10.402	11.492	8.59	11.756
	11.335	12.146	10.071	11.744	10.364		12.444	11.753	10.402	11.516	8.446	11.772
	11.344	12.083	10.077	11.728	10.396		12.409	11.765	10.399	11.529	8.394	11.786
	11.355	12.077	10.081	11.728	10.402		12.392	11.772	10.396	11.547	8.386	11.806
	11.374	12.071	10.093	11.716	10.412		12.37	11.779	10.386	11.549	8.364	11.82
	11.375	12.064	10.102	11.692	10.444		12.363	11.779	10.386	11.587	8.284	11.827
	11.397	12.048	10.131	11.692	10.45		12.363	11.804	10.356	11.592	8.17	11.828
	11.404	12.043	10.145	11.685	10.45		12.335	11.818	10.342	11.599	8.17	11.828
	11.404	12.043	10.145	11.683	10.454		12.267	11.832	10.27	11.605	8.102	11.834
	11.404	12.001	10.163	11.678	10.454		12.247	11.834	10.267	11.626	8.091	11.845
	11.404	12	10.163	11.673	10.492		12.247	11.834	10.267	11.626	8.083	11.869
	11.413	11.968	10.166	11.651	10.502		12.24	11.843	10.267	11.683	8.07	11.883
	11.413	11.944	10.191	11.609	10.502		12.221	11.852	10.266	11.685	7.946	11.883
	11.413	11.939	10.196	11.599	10.531		12.221	11.916	10.257	11.685	7.795	11.895
	11.413	11.939	10.196	11.599	10.531		12.167	11.934	10.243	11.769	7.622	11.939
	11.44	11.939	10.2	11.599	10.531		12.139	11.948	10.242	11.77	7.523	11.948
	11.44	11.916	10.202	11.599	10.531		12.139	11.974	10.227	11.776	7.507	11.954
	11.469	11.895	10.218	11.591	10.539		12.134	11.974	10.202	11.79	7.344	12.036
	11.484	11.883	10.233	11.572	10.539		12.131	11.974	10.186	11.806	7.034	12.038
	11.484	11.871	10.233	11.553	10.579		12.084	12	10.163	11.827	6.984	12.038
	11.497	11.869	10.243	11.547	10.581		12.077	12.01	10.163	11.832	0.408	12.083
	11.506	11.869	10.251	11.544	10.584		12.077	12.01	10.158	11.834		12.11
	11.513	11.86	10.251	11.544	10.61		12.064	12.023	10.128	11.885		12.12
	11.519	11.86	10.251	11.521	10.61		12.055	12.036	10.046	11.974		12.126
	11.544	11.848	10.267	11.518	10.61		12.015	12.077	10.046	12.055		12.242
	11.549	11.834	10.273	11.513	10.616		12	12.122	10.046	12.084		12.255
	11.554	11.827	10.29	11.506	10.639		11.939	12.124	10.035	12.084		12.283
	11.578	11.786	10.291	11.498	10.639		11.895	12.148	10.015	12.12		12.284
	11.598	11.77	10.316	11.486	10.639		11.834	12.167	10.015	12.146		12.325
	11.599	11.744	10.322	11.486	10.649		11.827	12.175	9.971	12.162		12.409
	11.612	11.715	10.322	11.45	10.674		11.772	12.221	9.961	12.195		12.429
	11.615	11.685	10.386	11.44	10.678		11.742	12.225	9.948	12.242		12.436
	11.673	11.685	10.388	11.435	10.69		11.715	12.226	9.87	12.282		12.444
	11.673	11.642	10.39	11.431	10.704		11.706	12.24	9.868	12.284		12.459
	11.678	11.635	10.402	11.424	10.71		11.69	12.256	9.845	12.33		12.471
	11.678	11.63	10.402	11.417	10.71		11.678	12.274	9.813	12.409		12.569
	11.706	11.628	10.412	11.413	10.733		11.599	12.276	9.813	12.424		12.569
	11.715	11.592	10.412	11.413	10.737		11.598	12.288	9.796	12.473		12.579
	11.744	11.592	10.416	11.397	10.779		11.578	12.33	9.752	12.655		12.59
	11.747	11.556	10.422	11.366	10.789		11.513	12.377	9.749	12.689		12.617
	11.772	11.54	10.426	11.357	10.797		11.44	12.409	9.715	12.707		12.629
	11.772	11.506	10.443	11.353	10.797		11.44	12.421	9.642	12.707		12.668
	11.786	11.489	10.45	11.329	10.812		11.426	12.449	9.497	12.713		12.722
	11.791	11.484	10.454	11.314	10.814		11.424	12.495	9.492	12.787		12.737
	11.828	11.469	10.49	11.314	10.82		11.419	12.557	9.433	12.815		12.781
	11.848	11.469	10.49	11.313	10.82		11.38	12.571	9.43	12.846		12.805
	11.876	11.469	10.502	11.287	10.827		11.366	12.612	9.324	12.847		12.846
	11.876	11.442	10.531	11.266	10.827		11.344	12.661	9.29	12.856		12.955
	11.883	11.44	10.531	11.255	10.841		11.331	12.68	9.285	12.91		12.96
	11.895	11.44	10.565	11.251	10.843		11.285	12.689	9.279	12.918		12.966
	11.916	11.44	10.571	11.227	10.843		11.266	12.735	9.236	12.918		13.046
	11.927	11.431	10.602	11.223	10.843		11.264	12.772	9.232	13.002		13.046
	11.954	11.424	10.643	11.222	10.843		11.251	12.805	9.152	13.018		13.072
	11.968	11.424	10.643	11.222	10.845		11.25	12.805	9.123	13.096		13.113
	11.974	11.404	10.649	11.212	10.86		11.222	12.812	9.089	13.123		13.113
	11.981	11.384	10.657	11.183	10.86		11.175	12.829	9.036	13.14		13.158
	11.994	11.344	10.675	11.183	10.86		11.16	12.841	8.997	13.186		13.17
	12	11.338	10.678	11.168	10.864		11.024	12.868	8.969	13.193		13.424
	12.001	11.338	10.688	11.144	10.864		11.003	12.878	8.906	13.229		13.436
	12.023	11.336	10.69	11.144	10.875		11.003	12.974	8.894	13.24		13.509
	12.038	11.316	10.705	11.144	10.881		10.948	13.013	8.88	13.272		13.559
	12.043	11.314	10.717	11.142	10.921		10.913	13.037	8.66	13.299		13.581
	12.064	11.294	10.721	11.118	10.948		10.904	13.099	8.629	13.312		13.608
	12.071	11.294	10.732	11.103	10.963		10.866	13.17	8.58	13.453		13.67
	12.084	11.294	10.733	11.087	10.978		10.864	13.191	8.544	13.608		13.692
	12.119	11.266	10.737	11.086	10.986		10.864	13.191	8.407	13.777		13.872
	12.119	11.251	10.747	11.057	11.003		10.814	13.26	8.366	13.807		13.878
	12.12	11.25	10.766	11.057	11.024		10.772	13.262	8.224	13.807		13.891
	12.131	11.242	10.773	11.052	11.057		10.737	13.416	8.163	13.819		13.935
	12.134	11.227	10.779	11.052	11.063		10.71	13.479	8.107	13.873		14.303
	12.146	11.226	10.789	11.052	11.086		10.69	13.479	7.943	13.927		14.57
	12.146	11.222	10.802	11.052	11.099		10.688	13.489	7.742	13.952		14.745
	12.201	11.22	10.808	11.041	11.108		10.657	13.563	7.001	14.052		14.745
	12.208	11.22	10.812	11.024	11.131		10.61	13.572	7.001	14.246		14.851
	12.215	11.183	10.812	11.024	11.131		10.602	13.581		14.28		14.858
	12.221	11.16	10.82	11.003	11.136		10.586	13.608		14.284		14.963
	12.24	11.16	10.828	10.997	11.147		10.581	13.633		14.415		15.236
	12.24	11.16	10.829	10.986	11.168		10.492	13.708		14.693		15.292
	12.256	11.108	10.843	10.98	11.203		10.468	13.731		15.009		15.464
	12.257	11.103	10.846	10.978	11.203		10.422	13.741		15.108		15.603
	12.282	11.042	10.874	10.978	11.203		10.412	13.765		15.566		15.666
	12.282	11.042	10.887	10.943	11.226		10.324	13.884		16.141		15.666
	12.282	11.033	10.91	10.934	11.227		10.31	13.903		16.814		16.261
	12.329	10.986	10.921	10.934	11.237		10.196	13.921				16.331
	12.335	10.986	10.935	10.925	11.242		10.163	13.922				16.447
	12.404	10.967	10.957	10.921	11.25		10.147	13.963				16.976
	12.409	10.957	10.957	10.866	11.264		10.077	14.066				17.46
	12.409	10.957	10.957	10.86	11.264		10.077	14.082				18.194
	12.419	10.948	10.988	10.828	11.266		10.064	14.138
	12.419	10.934	10.988	10.827	11.285		10.046	14.274
	12.419	10.864	10.994	10.82	11.311		10.046	14.328
	12.459	10.864	11.033	10.779	11.314		10.035	14.365
	12.512	10.843	11.033	10.772	11.316		10.004	14.425
	12.551	10.843	11.041	10.772	11.316		10.004	14.507
	12.551	10.829	11.057	10.766	11.316		10.004	14.711
	12.569	10.82	11.084	10.766	11.338		10.004	14.77
	12.628	10.82	11.084	10.758	11.344		10.002	14.776
	12.645	10.814	11.099	10.705	11.369		9.965	14.835
	12.645	10.814	11.099	10.69	11.397		9.877	15.006
	12.65	10.772	11.108	10.69	11.404		9.868	15.108
	12.65	10.766	11.144	10.678	11.413		9.845	15.3
	12.65	10.766	11.156	10.639	11.419		9.794	15.313
	12.655	10.721	11.16	10.632	11.431		9.642	15.81
	12.674	10.71	11.179	10.617	11.44		9.59	15.888
	12.683	10.706	11.2	10.617	11.44		9.59	15.913
	12.689	10.706	11.203	10.616	11.44		9.59	15.933
	12.689	10.68	11.203	10.61	11.44		9.525	15.97
	12.702	10.678	11.242	10.592	11.469		9.466	16.024
	12.703	10.678	11.25	10.592	11.486		9.463	16.423
	12.709	10.643	11.251	10.586	11.489		9.413	16.729
	12.709	10.602	11.266	10.584	11.489		9.393	17.577
	12.735	10.602	11.266	10.584	11.489		9.2	17.632
	12.772	10.592	11.266	10.574	11.498		9.169
	12.781	10.581	11.266	10.574	11.498		8.978
	12.787	10.581	11.287	10.555	11.518		8.66
	12.787	10.581	11.316	10.539	11.54		8.541
	12.805	10.581	11.338	10.539	11.549		8.49
	12.815	10.579	11.338	10.531	11.556		8.324
	12.815	10.539	11.397	10.531	11.572		8.284
	12.846	10.531	11.419	10.531	11.599		7.98
	12.854	10.529	11.469	10.531	11.615		7.959
	12.865	10.515	11.502	10.525	11.63		6.927
	12.867	10.502	11.506	10.513	11.642
	12.867	10.492	11.516	10.502	11.657
	12.884	10.492	11.518	10.499	11.657
	12.902	10.426	11.529	10.492	11.683
	12.931	10.422	11.529	10.486	11.685
	12.931	10.412	11.529	10.478	11.706
	12.96	10.404	11.54	10.451	11.706
	12.974	10.402	11.547	10.436	11.728
	12.994	10.402	11.562	10.426	11.742
	13.006	10.402	11.564	10.426	11.744
	13.013	10.396	11.572	10.402	11.756
	13.024	10.388	11.609	10.39	11.77
	13.051	10.364	11.609	10.39	11.806
	13.07	10.342	11.627	10.39	11.82
	13.077	10.273	11.63	10.364	11.828
	13.134	10.267	11.647	10.358	11.832
	13.184	10.267	11.669	10.358	11.834
	13.229	10.259	11.678	10.349	11.834
	13.24	10.251	11.683	10.322	11.843
	13.26	10.251	11.692	10.316	11.843
	13.263	10.245	11.706	10.313	11.86
	13.278	10.245	11.721	10.304	11.86
	13.285	10.233	11.728	10.267	11.869
	13.299	10.224	11.728	10.243	11.883
	13.321	10.2	11.742	10.242	11.883
	13.322	10.163	11.744	10.225	11.895
	13.34	10.147	11.756	10.224	11.916
	13.365	10.147	11.767	10.223	11.927
	13.403	10.13	11.767	10.213	11.939
	13.41	10.13	11.776	10.186	11.939
	13.411	10.13	11.79	10.186	11.939
	13.416	10.128	11.791	10.163	11.954
	13.449	10.128	11.794	10.128	11.974
	13.472	10.114	11.798	10.128	11.981
	13.478	10.097	11.834	10.102	11.994
	13.479	10.077	11.857	10.097	12.015
	13.48	10.046	11.859	10.097	12.024
	13.484	10.046	11.86	10.093	12.043
	13.498	10.046	11.869	10.049	12.048
	13.503	10.046	11.876	10.048	12.064
	13.509	10.004	11.916	10.038	12.064
	13.52	10.004	11.954	10.02	12.084
	13.551	9.998	11.967	10.012	12.098
	13.589	9.965	11.99	10.004	12.11
	13.608	9.948	11.99	10.004	12.119
	13.608	9.948	11.992	9.995	12.131
	13.618	9.946	12.007	9.98	12.139
	13.619	9.927	12.007	9.971	12.257
	13.706	9.896	12.016	9.963	12.257
	13.741	9.877	12.077	9.948	12.262
	13.765	9.87	12.079	9.948	12.269
	13.851	9.868	12.084	9.922	12.284
	13.854	9.83	12.11	9.914	12.325
	13.873	9.811	12.128	9.914	12.325
	13.878	9.777	12.172	9.86	12.325
	13.885	9.694	12.194	9.856	12.348
	13.891	9.677	12.221	9.847	12.35
	13.896	9.672	12.226	9.847	12.35
	13.896	9.666	12.243	9.847	12.363
	13.923	9.649	12.247	9.826	12.409
	13.968	9.623	12.325	9.826	12.409
	13.993	9.608	12.348	9.826	12.436
	13.993	9.603	12.37	9.813	12.444
	13.997	9.597	12.384	9.809	12.446
	13.999	9.579	12.404	9.794	12.451
	14.035	9.525	12.409	9.777	12.451
	14.049	9.52	12.419	9.769	12.489
	14.052	9.516	12.461	9.762	12.499
	14.052	9.45	12.479	9.757	12.526
	14.064	9.419	12.489	9.743	12.526
	14.066	9.397	12.512	9.73	12.557
	14.068	9.393	12.521	9.717	12.569
	14.069	9.313	12.559	9.698	12.57
	14.082	9.304	12.569	9.692	12.584
	14.089	9.304	12.629	9.677	12.595
	14.101	9.295	12.674	9.674	12.617
	14.148	9.252	12.709	9.673	12.655
	14.148	9.2	12.719	9.672	12.663
	14.148	9.182	12.779	9.666	12.697
	14.184	9.162	12.805	9.666	12.697
	14.207	9.135	12.811	9.666	12.723
	14.235	9.135	12.815	9.629	12.737
	14.246	9.098	12.825	9.629	12.779
	14.258	9.054	12.858	9.629	12.854
	14.285	9.054	12.863	9.623	12.923
	14.287	8.978	12.867	9.603	12.955
	14.287	8.962	12.879	9.59	12.955
	14.302	8.941	12.884	9.588	12.986
	14.303	8.838	12.904	9.575	13.013
	14.327	8.81	12.918	9.562	13.058
	14.365	8.808	12.92	9.562	13.058
	14.369	8.8	12.964	9.56	13.083
	14.488	8.772	12.966	9.516	13.096
	14.508	8.715	12.968	9.51	13.115
	14.518	8.715	12.974	9.492	13.161
	14.524	8.686	13.033	9.462	13.183
	14.524	8.674	13.051	9.45	13.183
	14.536	8.674	13.062	9.433	13.229
	14.563	8.657	13.111	9.43	13.229
	14.57	8.657	13.128	9.419	13.229
	14.597	8.645	13.14	9.404	13.274
	14.597	8.609	13.158	9.342	13.284
	14.597	8.58	13.161	9.342	13.304
	14.6	8.57	13.26	9.307	13.321
	14.604	8.512	13.312	9.272	13.321
	14.608	8.49	13.337	9.225	13.365
	14.608	8.485	13.4	9.225	13.383
	14.626	8.485	13.422	9.225	13.41
	14.627	8.485	13.422	9.216	13.416
	14.655	8.426	13.435	9.205	13.424
	14.657	8.411	13.47	9.189	13.436
	14.701	8.364	13.47	9.179	13.436
	14.701	8.234	13.478	9.144	13.449
	14.725	8.213	13.478	9.135	13.453
	14.736	8.183	13.523	9.135	13.507
	14.745	8.183	13.523	9.123	13.509
	14.77	8.122	13.619	9.116	13.547
	14.802	8.099	13.645	9.089	13.563
	14.851	8.091	13.656	9.085	13.563
	14.851	8.05	13.679	9.04	13.656
	14.875	8.039	13.741	9.034	13.685
	14.893	8.029	13.741	9.031	13.709
	14.925	8.021	13.749	9.018	13.723
	14.927	7.998	13.794	8.997	13.765
	14.964	7.966	13.795	8.978	13.795
	15.003	7.872	13.8	8.969	13.815
	15.031	7.768	13.851	8.969	13.819
	15.052	7.763	13.858	8.957	13.873
	15.052	7.712	13.867	8.946	13.926
	15.059	7.657	13.867	8.911	13.969
	15.081	7.372	13.872	8.911	13.999
	15.096	7.244	13.896	8.894	14.021
	15.14	7.143	13.903	8.887	14.069
	15.163	7.125	13.909	8.857	14.077
	15.163	7.07	13.929	8.826	14.089
	15.184	7.019	13.956	8.81	14.1
	15.233	6.642	13.959	8.801	14.17
	15.236	6.541	14.011	8.789	14.274
	15.24	6.12	14.017	8.781	14.316
	15.269	5.835	14.039	8.774	14.419
	15.3		14.039	8.772	14.471
	15.331		14.123	8.763	14.49
	15.384		14.17	8.76	14.507
	15.419		14.21	8.698	14.524
	15.421		14.281	8.679	14.604
	15.431		14.281	8.674	14.661
	15.433		14.299	8.667	14.689
	15.489		14.327	8.655	14.701
	15.489		14.328	8.647	14.784
	15.538		14.369	8.629	14.802
	15.564		14.425	8.543	14.858
	15.57		14.425	8.49	14.875
	15.612		14.449	8.472	14.875
	15.696		14.464	8.411	14.891
	15.765		14.486	8.366	14.941
	15.777		14.644	8.364	15.387
	15.803		14.684	8.364	15.582
	15.933		14.719	8.284	15.744
	15.933		14.79	8.261	15.875
	15.933		14.829	8.254	16.028
	15.934		14.947	8.234	16.058
	16.012		15.009	8.224	16.333
	16.121		15.096	8.224	16.444
	16.152		15.146	8.212	17.061
	16.198		15.147	8.162	17.181
	16.248		15.233	8.16	17.258
	16.286		15.277	8.122
	16.367		15.327	8.085
	16.447		15.349	8.047
	16.474		15.361	8
	16.624		15.441	7.998
	16.643		15.451	7.819
	16.773		15.459	7.819
	16.807		15.678	7.682
	16.822		16.09	7.657
	16.933		16.152	7.647
	17.123		16.294	7.573
	17.181		16.485	7.523
	17.181		16.805	7.324
	17.206		17.031	7.253
	17.431		17.517	7.236
	17.52		17.883	7.218
	17.569		17.896	7.175
	17.587		18.973	7.175
	17.602			7.137
	17.626			7.046
	17.714			6.936
	18.219			6.903
	18.349			6.645
	18.388			6.541
	18.484			6.327
	18.524
	18.524
	18.769
	18.856
	18.954
	19.38
	19.942
	20.534
	21.429
	21.722
	21.889
	22.488
	23.026
	siSCR	siMACF1,1	siMACF1,2	siMACF1,3	siMACF1,mix		shSCR	shMACF1,1	shMACF1,2	shMACF1,3	shMACF1,4	shMACF1,mix
	12.3695	11.424	10.816	10.98	10.9945	Median	12.6955	11.4365	11.5265	10.924	11.147	11.041
	2.54629	2.13207	2.26238	1.99052	1.98268	SD	2.24279	1.99606	1.87735	1.91562	2.30369	2.01461
	0.11586	0.104158	0.105142	0.0918157	0.0939878	SEM	0.134272	0.121702	0.123521	0.123653	0.172669	0.128709

## Sheet: 2C
	ShRNA experiments							SiRNA experiments
	shSCR	shMACF1.1	shMACF1.2	shMACF1.3	shMACF1.4	shMACF1.mix		siSCR	siMACF1.1	siMACF1.2	siMACF1.3	siMACF1.mix
Distance beetween adjacent myonuclei	232.667	64.801	336.025	28.766	29.593	38.208		110.397	120.154	33.67	151.018	57.52
	18.232	63.468	50.612	56.743	82.193	62.315		90.817	80.488	9.262	118.652	11.317
data obtained from 3 individual experiments	54.92	97.7	14.653	12.32	153.408	70.184		61.762	85.733	9.46	46.336	11.703
	13.901	79.426	13.134	50.697	93.886	45.408		90.498	117.843	10.462	51.155	13.44
	131.559	59.619	131.32	9.235	103.427	126.054		36.923	116.783	11.978	158.734	67.119
	43.305	70.545	73.742	17.738	36.816	141.365		75.444	24.476	17.028	117.691	100.435
	182.14	40.814	153.852	21.303	67.734	98.455		46.912	105.91	10.776	12.407	15.247
	132.808	59.045	173.113	12.255	157.814	15.044		131.978	18.861	27.533	34.46	51.576
	198.557	91.683	163.566	30.115	153.095	6.264		30.417	210.185	25.57	120.822	29.255
	26.562	78.914	9.845	38.7	52.936	4.327		44.482	165.917	126.127	102.864	45.59
	272.28	81.305	9.307	42.222	78.526	9.167		82.328	68.821	125.697	96.345	18.151
	107.692	101.356	10.781	15.247	107.299	192.742		45.426	153.559	169.841	92.552	81.628
	287.228	73.88	13.44	13.953	13.385	17.422		78.105	185.01	83.362	34.191	94.827
	220.573	79.728	28.65	11.219	126.722	17.84		25.579	127.17	38.652	35.025	138.412
	185.994	50.502	172.913	25.189	138.861	49.058		52.788	81.014	178.099	51.805	98.455
	11.186	27.554	73.295	10.965	53.458	55.312		43.801	99.035	83.46	73.101	92.811
	14.853	73.917	49.367	11.77	62.812	169.453		37.707	70.317	61.974	76.055	59.823
	131.243	68.023	84.288	10.643	74.22	122.682		142.131	70.844	87.209	86.346	43.713
	140.725	74.878	50.94	9.504	63.858	133.976		58.045	16.43	17.135	89.129	30.639
	75.703	157.014	14.087	7.74	12.32	76.191		112.1	68.595	50.808	90.607	40.904
	78.883	80.625	18.09	11.219	95.512	54.555		109.67	9.589	55.312	98.244	159.98
	91.29	85.927	85.733	28.737	33.67	44.556		51.159	12.522	96.174	27.708	90.578
	64.503	29.782	15.392	26.506	11.703	33.203		10.466	66.554	107.307	13.106	47.597
	35.145	92.99	57.52	37.22	70.332	115.686		69.388	130.96	109.332	13.605	150.423
	28.737	90.705	34.337	46.12	56.95	171.1		92.52	57.611	96.324	41.285	169.996
	55.128	130.958	36.946	27.775	107.326	57.147		133.15	187.728	25.872	37.46	65.945
	81.976	35.192	74.956	59.395	75.429	67.157		48.803	314.339	101.92	79.459	33.557
	119.578	20.686	35.152	56.795	68.906	51.02		18.481	21.24	209.162	95.139	60.979
	28.387	119.578	24.639	74.342	40.904	51.748		80.126	109.006	78.416	200.205	14.423
	33.247	91.74	61.58	45.918	43.732	61.142		71.826	286.679	141.055	168.655	9.391
	58.695	175.821	85.806	59.339	59.935	67.482		29.984	21.552	110.308	144.719	13.422
	164.358	49.052	101.398	23.674	101.063	11.858		43.522	181.25	229.041	75.767	14.161
	135.46	63.24	94.827	18.783	76.167	26.453		96.784	16.444	64.918	9.523	23.256
	110.876	51.461	91.392	12.704	94.488	30.115		49.159	17.414	13.468	6.084	15.051
	284.485	87.24	70.246	22.716	52.831	41.985		40.104	148.837	120.329	128.282	30.311
	143.988	84.236	60.62	11.703	52.338	149.302		71.298	32.201	69.702	34.093	17.041
	172.093	54.92	11.998	63.858	144.969	120.856		130.761	43.865	31.861	32.708	92.199
	13.468	117.943	16.005	6.264	58.433	144.906		162.747	22.877	17.546	130.725	92.371
	20.668	57.707	84.819	15.512	9.589	208.29		96.149	49.97	12.785	23.088	25.086
	49.376	93.525	48.341	51.99	12.168	36.505		74.511	150.421	21.825	69.54	38.721
	109.203	100.432	64.784	70.376	8.654	42.418		69.495	39.616	17.617	91.336	75.122
	173.024	73.137	83.466	48.559	129.266	27.554		94.263	12.323	198.569	21.892	46.336
	47.612	63.111	119.324	41.87	21.767	142.614		293.964	11.18	155.144	72.335	28.86
	225.927	68.843	64.49	14.627	106.766	67.014		74.04	12.785	74.677	32.952	139.475
	132.641	121.727	20.525	17.422	13.789	76.372		110.125	90.599	103.363	62.67	74.555
	56.821	118.768	266.463	18.106	7.095	95.756		117.994	28.004	143.836	75.601	12.323
	101.123	29.761	109.977	30.96	8.604	14.708		188.694	12.929	173.856	19.621	13.06
	13.106	90.611	139.058	12.524	11.186	48.952		116.995	10.32	147.872	39.345	15.027
	151.464	138.172	110.367	54.886	24.639	157.657		68.118	9.053	67.525	11.703	46.067
	103.401	31.201	108.375	6.883	41.406	26.256		136.063	58.48	41.406	9.307	61.598
	8.385	44.151	169.036	10.884	10.643	62.498		73.496	69.782	43.034	150.514	78.507
	154.156	61.333	21.511	7.354	8.605	103.612		129.793	261.658	36.855	146.274	56.085
	148.855	51.893	72.53	11.219	31.083	67.778		69.063	7.929	22.623	69.971	10.5
	199.179	71.421	46.712	10.198	10.643	137.374		126.501	28.628	61.446	114.36	9.307
	260.279	130.335	62.694	28.65	86.43	69.472		43.865	12.05	149.552	189.397	84.9
	107.223	46.638	68.023	24.889	85.356	70.561		75.74	123.443	96.573	117.313	133.203
	104.846	130.603	37.486	51.317	84.182	45.645		166.112	37.693	100.1	104.116	62.297
	99.808	131.691	20.452	11.628	84.182	21.251		144.294	145.554	156.151	39.859	143.857
	118.605	67.507	61.82	66.203	44.651	25.089		87.504	168.746	101.234	87.95	13.901
	216.215	71.187	121.665	40.277	77.176	24.476		60.743	214.375	126.265	73.787	10.946
	387.376	74.622	57.572	54.507	59.339	69.801		209.45	102.34	38.365	34.642	21.295
	218.33	73.925	64.072	57.665	42.502	15.865		73.644	106.185	49.715	24.28	59.644
	352.916	90.053	78.375	49.333	53.161	14.627		93.846	108.305	170.021	15.051	95.876
	210.058	81.141	75.336	40.409	16.77	9.589		141.386	106.901	74.463	15.512	147.878
	173.503	78.706	56.847	43.879	12.32	21		123.747	112.809	81.426	105.029	35.403
	150.527	96.752	55.214	106.391	109.684	18.253		171.899	127.422	30.296	61.738	36.515
	165.736	42.719	83.48	43.522	63.655	17.144		71.257	52.622	76.921	175.53	85.72
	103.098	56.145	114.311	71.641	39.771	43.732		89.593	93.552	82.246	117.275	98.751
	84.747	9.307	74.578	38.104	4.634	79.724		185.621	73.705	71.094	95.906	174.337
	119.109	11.893	81.938	93.525	267.994	6.45		92.193	68.126	129.658	79.654	12.528
	141.708	54.906	91.271	49.966	152.649	10.198		137.603	63.41	111.416	36.189	25.481
	57.056	51.769	182.795	16.533	26.828	35.092		237.416	62.609	144.244	155.085	17.738
	99.658	74.818	40.229	46.188	45.465	55.349		11.041	119.267	7.74	138.591	228.888
	88.323	21.825	29.305	38.968	112.522	137.736		406.933	116.356	67.13	85.142	124.976
	11.954	19.177	38.962	41.002	132.776	31.273		242.832	205.483	53.725	23.22	11.703
	192.91	72.425	68.397	54.009	157.518	39.617		82.097	50.804	135.844	7.095	70.906
	63.24	69.961	35.569	71.582	43.433	95.22		51.479	50.644	70.42	47.953	90.908
	133.602	73.428	46.301	74.116	65.79	71.339		101.152	98.074	117.71	22.388	165.071
	176.576	53.941	78.299	37.712	131.208	60.849		72.388	114.773	148.025	21.164	17.422
	37.869	69.504	31.94	117.379	41.285	117.927		138.471	24.544	157.927	26.895	11.576
	22.649	72.832	89.605	88.122	46.176	63.023		50.352	19.35	18.616	25.361	69.658
	15.512	75.641	8.604	81.953	56.815	175.228		59.571	101.612	58.207	51.479	15.181
	131.259	69.146	156.289	40.486	43.211	71.747		98.62	80.648	42.167	17.966	11.703
	91.256	55.496	81.032	50.065	28.602	128.93		177.019	120.597	12.255	97.275	51.313
	122.617	85.918	127.161	94.289	26.338	178.934		39.234	15.93	12.964	85.144	105.847
	317.043	28.989	87.019	49.682	9.465	15.099		217.064	107.009	9.053	47.418	100.787
	156.875	20.142	59.12	58.325	21.937	18.414		101.693	51.478	17.541	49.16	59.595
	93.113	20.013	105.131	39.682	8.474	115.165		43.385	59.748	38.853	48.673	29.317
	339.447	38.657	168.842	43.874	81.551	45.733		21.275	73.88	10.812	95.886	16.021
	517.478	31.638	31.228	68.754	31.731	43.022		36.487	10.327	8.605	105.19	13.605
	149.17	30.322	12.118	33.513	47.156	102.978		30.539	87.362	10.34	52.74	22.205
	125.092	80.78	51.636	61.333	214.103	43.679		353.919	17.746	11.312	20.686	115.625
	134.972	80.062	34.685	31.763	92.721	113.932		74.018	23.256	40.052	62.135	34.185
	188.827	106.517	100.343	258.433	13.021	73.025		64.454	28.563	105.082	29.229	46.485
	74.793	67.145	160.375	9.391	30.96	232.953		88.996	20.366	59.929	17.655	77.668
	118.209	153.647	35.481	7.402	21.682	84.436		57.532	26.136	17.414	29.115	181.355
	111.846	17.294	68.701	5.548	21.511	64.596		87.76	31.625	144.226	120.328	18.871
	45.904	97.164	92.259	10.013	26.516	83.092		174.859	12.938	271.821	49.466	234.016
	74.845	22.529	110.732	31.929	109.112	99.129		162.676	26.453	121.431	56.178	82.107
	116.617	30.518	32.855	33.897	71.199	65.282		103.556	10.47	205.898	72.759	110.448
	66.582	68.732	105.91	41.058	16.326	15.113		73.176	28.452	90.806	73.295	36.148
	66.613	60.023	69.349	52.936	33.213	21.158		90.562	17.746	24.314	49.058	13.021
	78.215	105.788	84.954	34.266	50.791	34.266		58.014	13.606	21.059	22.371	137.071
	81.311	140.367	98.751	80.32	14.552	16.125		100.969	126.292	32.962	70.812	15.819
	54.879	136.356	125.059	48.833	86.665	125.087		124.745	96.364	70.384	11.54	28.303
	59.319	155.755	90.28	60.75	140.84	44.751		262.846	181.908	94.087	85.727	122.248
	61.775	220.877	119.673	146.612	62.315	53.282		166.185	63.69	30.012	58.14	18.749
	74.887	155.579	112.384	17.655	76.622	16.021		171.406	19.404	86.404	23.798	163.539
	170.252	187.796	111.608	91.018	151.319	8.385		132.005	21.669	274.863	35.943	118.19
	178.049	194.753	18.266	35.099	86.614	11.317		79.288	113.932	199.653	67.306	43.806
	79.038	26.001	13.468	100.468	21.528	15.223		117.143	100.506	187.316	59.02	97.018
	139.817	48.253	13.021	10.946	157.265	18.534		92.309	134.884	176.228	28.911	73.88
	130.483	76.622	20.398	14.243	68.533	54.276		148.504	103.387	64.368	20.811	56.56
	66.087	120.178	15.819	65.739	194.803	93.481		114.857	108.375	78.614	71.362	43.535
	133.367	77.482	16.618	54.291	73.515	170.324		88.966	43.936	190.868	24.34	40.284
	189.227	75.424	65.889	126.644	124.91	26.729		200.498	68.853	80.39	24.34	85.162
	46.535	8.983	15.331	13.894	25.813	78.091		298.024	30.198	117.782	41.022	173.409
	26.476	122.257	49.913	62.027	160.818	109.044		149.457	160.381	28.737	48.1	247.61
	44.56	28.409	51.122	179.319	106.239	126.568		109.521	70.132	45.936	33.864	9.589
	130.789	67.587	69.743	49.637	104.34	142.998		138.203	59.934	102.17	62.249	10.946
	157.498	86.656	47.195	26.843	24.28	18.447		37.282	32.635	58.429	40.449	7.211
	121.214	48.1	54.337	26.944	19.865	27.426		57.982	66.405	97.738	75.429	13.605
	73.137	51.033	31.929	23.734	42.091	57.52		90.116	85.998	46.152	78.677	8.474
	113.162	42.399	42.17	58.14	60.261	55.278		137.885	55.067	203.07	66.307	8.474
	85.413	67.119	58.913	101.005	66.365	50.331		117.694	27.705	71.318	45.69	55.003
	88.825	177.268	157.531	71.623	54.49	67.482		139.99	61.609	35.234	98.721	42.659
	86.395	102.806	55.61	18.414	18.151	15.93		187.156	15.491	17.135	98.425	66.407
	97.472	140.693	34.276	9.62	100.025	16.177		31.926	90.955	143.65	47.999	68.322
	45.146	63.597	91.788	116.415	147.863	12.98		138.12	193.816	33.793	52.563	62.481
	105.3	49.916	77.572	91.002	28.358	63.322		217.865	163.377	47.331	55.154	107.061
	112.289	96.967	15.534	15.583	40.769	136.388		116.059	109.995	81.632	27.868	139.907
	122.68	87.375	68.825	17.367	29.824	121.028		143.846	48.495	48.899	175.144	142.042
	125.868	40.796	92.659	13.468	30.913	196.738		124.641	72.372	134.606	126.686	117.728
	61.58	95.48	67.685	47.721	61.242	66.36		71.827	15.25	11.134	27.121	85.534
	69.53	54.524	148.088	27.554	74.511	152.976		205.719	132.076	10.812	64.767	155.402
	322.662	91.97	48.56	44.776	13.804	196.488		97.31	75.143	66.041	34.979	51.338
	47.355	201.602	53.383	50.795	12.077	57.675		67.17	74.016	68.737	31.861	25.086
	48.376	80.94	83.904	17.904	47.636	47.167		77.749	101.222	72.231	122.414	82.932
	463.556	20.569	22.649	51.547	50.689	62.285		53.783	40.411	102.08	34.039	44.293
	111.628	12.9	81.923	49.052	66.169	31.71		130.566	18.478	89.506	115.39	25.423
	113.75	74.245	18.09	8.604	46.444	86.112		181.776	241.131	16.542	29.607	32.148
	152.539	76.235	20.686	16.348	29.374	74.082		250.731	124.528	94.269	58.516	19.35
	55.414	38.77	193.4	18.163	34.589	83.89		109.629	91.611	67.989	111.307	8.604
	98.564	95.388	12.906	13.234	78.112	58.054		165.969	120.767	111.962	28.497	14.627
	56.085	38.374	56.971	11.703	25.942	25.669		144.278	14.146	142.926	28.381	13.021
	62.297	75.122	91.076	14.703	53.596	67.108		69.957	40.681	49.998	20.087	11.219
	130.325	150.674	106.099	13.021	22.529	13.606		38.074	82.199	260.302	30.663	13.297
	87.616	52.44	68.5	36.378	56.422	50.714		43.445	70.419	53.028	9.504	21.825
	151.128	244.369	19.35	44.452	39.535	98.545		33.463	107.738	14.416	10.325	113.192
	47.386	97.366	97.307	22.585	167.146	27.213		45.412	47.449	224.972	18.069	28.847
	71.421	80.071	87.513	36.149	345.728	39.74		96.825	100.291	83.9	77.444	89.664
	143.939	138.709	13.044	40.33	40.793	38.093		102.002	94.964	323.231	18.871	74.122
	195.576	32.023	43.215	107.86	142.928	41.202		93.554	21.164	383.653	18.253	194.589
	134.63	204.054	37.748	56.969	42.029	29.424		51.978	80.468	309.155	51.114	36.714
	11.61	11.186	151.28	8.773	114.796	29.831		44.696	60.414	83.373	35.109	77.37
	228.109	84.098	88.061	23.501	54.487	33.203		193.353	184.713	83.048	119.752	62.255
	111.399	83.48	62.906	15.583	94.699	26.95		168.912	23.485	110.969	197.827	55.242
	52.338	104.103	92.251	21.363	76.657	16.551		61.933	128.022	42.728	90.309	63.322
	68.71	84.839	108.272	17.415	18.163	14.653		73.146	61.036	84.677	117.957	76.959
	235.361	149.381	22.722	17.294	62.005	55.339		46.923	61.732	136.725	28.643	71.958
	64.581	75.886	27.209	49.732	17.294	57.532		43.214	82.812	37.069	151.76	55.788
	100.969	38.093	16.97	16.125	145.843	8.21		154.977	108.85	15.866	168.813	70.219
	111.658	171.018	16.745	25.827	42.161	54.23		126.417	13.901	15.223	112.584	12.407
	41.325	106.62	17.174	103.01	34.24	82.115		68.08	107.471	210.527	28.599	163.19
	464.223	31.731	22.062	14.703	10.42	93.787		146.559	132.091	106.347	65.39	70.844
	157.739	69.928	80.198	9.735	36.81	23.256		295.342	80.145	103.313	43.215	58.851
	13.021	61.963	7.74	14.191	15.512	18.981		93.747	87.108	55.636	109.343	73.822
	194.925	116.816	44.185	10.884	86.625	10.638		91.613	104.712	68.322	117.364	83.904
	110.622	30.226	47.314	16.551	105.153	17.427		58.064	63.521	45.002	89.152	102.363
	22.241	19.101	197.916	20.89	26.001	9.03		157.645	37.443	119.844	109.036	128.942
	12.323	219.832	23.907	5.805	91.388	20.65		146.627	19.744	25.408	37.154	199.701
	28.381	182.535	109.18	15.386	117.703	60.726		101.309	30.967	46.312	119.167	105.111
	128.559	13.297	56.76	25.012	73.442	10.32		127.944	144.849	90.054	107.816	17.717
	107.774	6.856	61.95	32.844	58.011	10.5		29.253	86.198	80.458	16.164	16.348
	88.891	8.518	157.061	32.798	11.186	9.03		14.835	81.06	136.982	14.891	18.93
	102.597	8.654	44.718	26.687	17.746	6.085		130.949	54.195	5.017	18.572	12.906
	273.896	10.034	64.303	24.23	102.565	8.775		20.155	84.362	11.576	42.191	11.984
	109.684	12.39	70.565	12.32	208.226	7.933		15.507	112.835	11.411	76.56	27.868
	82.731	113.837	83.395	25.808	99.163	10.034		21.556	56.174	50.817	15.48	26.506
	98.466	45.576	122.016	27.765	93.685	39.015		55.166	82.409	136.084	23.292	30.315
	74.421	40.27	83.04	10.884	130.258	60.137		76.985	4.302	93.074	21.373	43.119
	113.228	38.311	110.812	13.468	109.492	99.788		82.264	17.422	10.643	75.219	15.795
	103.313	67.802	15.512	46.512	60.414	10.638		89.134	83.289	85.165	125.422	30.322
	310.96	52.563	12.05	76.135	95.46	73.544		40.061	98.274	89.029	21.911	24.23
	70.687	94.667	29.868	99.054	69.576	98.631		62.285	85.806	154.791	10.5	76.887
	80.899	17.904	9.62	108.663	262.127	65.81		19.234	47.472	41.337	23.245	82.57
	67.802	111.169	13.901	88.891	180.918	71.213		10.5	144.045	41.771	11.574	32.742
	154.976	72.547	32.764	99.263	170.871	143.435		60.743	4.302	88.962	10.033	83.355
	60.451	16.166	107.771	113.844	182.251	57.88		75.628	6.205	137.736	17.028	143.901
	110.342	88.268	92.851	48.185	102.482	160.696		13.87	15.866	207.329	12.167	41.925
	68.921	81.755	64.79	41.285	140.693	116.743		9.867	4.634	290.76	13.384	7.744
	86.442	85.044	89.155	71.607	144.381	121.077		7.349	17.617	169.842	34.251	11.703
	129.891	49.436	45.922	20.452	255.637	126.182		43.865	63.182	7.792	162.929	31.631
	80.136	65.017	37.08	197.039	168.069	63.985		58.575	97.497	96.107	106.433	100.653
	94.264	120.131	54.036	57.055	48.345	114.507		122.645	67.009	63.678	77.453	100.641
	83.887	134.076	41.202	56.348	57.963	89.676		24.767	56.672	26.516	22.583	127.712
	56.612	117.615	53.333	46.947	62.1	139.845		61.411	60.531	41.337	134.68	36.94
	163.151	97.138	34.589	10.32	62.897	68.387		26.387	81.661	18.069	74.888	41.541
	224.799	70.917	90.292	18.394	58.186	12.77		62.563	104.676	12.935	88.12	44.733
	132.372	71.386	36.788	54.453	61.549	62.498		63.878	73.908	7.978	28.089	126.568
	156.771	91.928	87.515	55.672	76.055	43.543		72.896	85.395	78.812	15.113	107.326
	89.341	75.594	27.453	76.763	73.137	83.502		37.22	146.289	107.192	15.793	43.535
	82.642	142.025	10.361	74.937	56.709	125.172		77.798	155.833	109.285	24.104	100.083
	105.469	75.134	38.662	106.728	148.855	31.287		63.117	49.966	145.423	95.314	94.683
	121.049	30.322	36.94	185.564	139.305	92.99		44.482	17.422	103.612	77.639	24.337
	74.186	214.194	37.22	69	156.381	64.532		60.8	38.711	61.502	92.119	59.045
	104.35	86.421	197.759	71.853	41.925	101.01		150.506	76.896	55.53	122.981	9.465
	41.265	84.694	138.741	102.608	45.007	76.766		86.468	88.271	138.789	83.007	64.767
	52.89	168.205	12.721	83.092	99.788	71.576		354.798	59.539	19.659	31.261	58.516
	71.155	105.837	99.323	52.536	113.024	147.606		27.161	57.59	21.286	42.55	53.076
	138.532	137.381	15.223	59.395	165.382	44.017		89.227	41.33	51.114	52.169	77.887
	54.973	219.707	126.427	36.669	179.113	61.975		211.14	38.422	200.975	61.166	167.092
	48.82	54.46	24.107	79.946	113.637	38.872		36.948	29.115	115.147	37.864	10.325
	75.594	81.673	94.622	24.953	60.329	16.905		68.302	31.493	93.941	26.795	40.137
	45.044	74.042	44.519	108.851	18.09	14.552		15.387	43.211	17.422	73.431	10.325
	266.392	21.58	42.959	79.705	141.088	15.331		23.368	52.249	95.232	10.033	39.408
	92.082	68.397	21.937	93.277	38.748	24.488		125.697	126.589	153.08	61.56	30.748
	92.851	173.564	108.98	146.87	112.882	46.12		43.607	46.997	188.89	30.307	21.58
	69.229	19.507	20.252	50.024	204.913	75.718		23.9	105.328	147.706	67.786	77.214
	177.695	38.566	83.651	57.114	99.765	36.505		17.311	27.128	20.65	63.249	99.222
	204.344	77.482	74.237	49.644	26.729	165.107		104.646	16.371	9.147	229.308	122.934
	244.791	30.976	23.088	46.761	68.382	172.898		30.039	31.861	17.209	111.453	61.838
	56.892	50.479	130.29	61.097	75.601	216.236		74.246	53.493	17.144	163.573	34.685
	68.517	36.179	46.085	158.037	66.131	40.174		81.177	19.46	44.751	202.633	120.639
	99.71	43.522	105.469	92.943	24.23	25.188		55.707	36.739	115.349	46.25	73.46
	229.106	104.103	64.624	112.993	16.371	168.665		30.302	56.065	21.285	139.554	26.516
	72.425	44.092	66.407	5.442	17.422	15.223		40.409	34.497	45.608	90.17	48.379
	139.639	18.09	77.118	13.162	36.855	49.436		158.995	51.629	92.643	76.264	92.99
	155.055	67.63	72.736	46.12	30.518	31.347		77.941	22.027	88.572	65.661	63.023
	60.653	64.233	41.285	87.228	86.046	50.836		104.999	41.601	187.912	31.473	82.445
	13.297	65.67	101.239	14.007	57.766	52.571		75.974	17.541	146.92	11.184	40.587
	28.654	133.929	66.393	45.039	33.935	18.93		64.261	33.396	130.44	8.082	37.357
	46.175	16.317	96.883	18.749	54.487	30.771		57.123	24.095	177.791	10.4	61.543
	34.734	77.291	120.856	14.423	57.448	100.392		35.015	55.926	168.192	19.744	90.214
	27.128	51.626	59.026	23.3	57.211	102.46		42.833	209.433	19.101	108.367	13.422
	210.045	70.844	68.322	38.958	23.372	10.397		25.877	61.005	24.761	18.616	23.627
	85.72	50.356	112.74	34.914	103.495	11.022		11.283	108.881	51.781	37.629	39.429
	147.872	56	98.571	26.192	99.263	13.44		51.79	257.887	86.57	22.722	17.23
	76.896	35.309	56.37	23.22	27.742	18.749		10.881	208.015	66.892	171.224	23.485
	35.109	134.123	49.256	126.841	226.712	10.198		36.596	33.793	79.79	172.702	58.111
	30.054	113.86	51.983	97.904	155.081	14.112		49.177	32.437	102.01	114.772	48.261
	51.636	145.055	46.535	59.414	93.122	51.805		56.55	15.956	36.017	129.792	36.487
	43.061	166.861	9.62	88.174	51.891	12.528		26.944	54.153	144.008	87.067	43.916
	62.38	14.653	126.284	121.365	110.308	150.359		118.005	52.277	94.404	52.499	56.252
	81.378	18.949	159.368	56.352	20.811	36.946		119.43	103.363	133.577	109.953	120.119
	74.282	90.083	28.563	61.82	26.211	56.815		75.014	48.237	113.092	139.513	9.845
	62.356	176.929	14.191	11.703	21.158	34.614		130.624	16.317	44.728	46.017	13.44
	43.717	45.316	14.191	10.812	16.82	73.263		158.47	9.824	88.584	11.018	133.086
	29.782	76.11	13.162	11.219	69.232	40.229		34.835	71.896	51.857	29.593	108.753
	94.979	116.488	97.972	18.838	14.803	65.805		33.646	46.639	21.517	71.012	63.515
	127.309	64.487	26.687	113.028	120.488	66.169		92.824	29.054	113.913	58.887	81.628
	246.126	159.67	25.8	163.539	26.936	58.613		33.861	16.363	62.307	54.825	89.041
	93.661	37.527	17.522	58.033	30.832	95.462		83.651	20.442	91.928	56.159	82.922
	75.641	48.711	139.594	15.099	48.742	70.73		93.488	20.242	6.934	8.41	115.763
	125.444	202.534	123.054	23.157	89.129	32.539		80.201	32.236	14.183	7.932	79.816
	121.467	207.591	71.958	12.39	119.578	114.114		127.499	43.411	7.767	79.751	91.112
	88.185	50.886	52.831	14.007	15.512	14.703		81.555	31.447	11.978	249.116	41.466
	183.057	98.651	148.842	24.834	42.882	16.52		21.522	76.885	65.957	98.144	55.564
	187.744	91.018	72.409	25.557	81.972	10.468		123.331	66.892	87.196	80.177	51.057
	252.961	25.163	37.792	36.179	29.445	17.028		13.606	214.635	74.587	80.568	27.742
	154.423	33.413	49.932	30.988	21.363	11.484		10.965	11.18	32.928	96.827	62.195
	88.931	21.825	72.158	29.054	59.344	67.136		41.037	20.93	40.566	43.051	85.789
	205.476	37.781	74.267	38.893	91.728	27.697		127.45	46.312	18.805	29.703	185.534
	97.745	79.403	40.769	24.834	150.687	140.48		160.599	86.771	28.387	87.171	79.92
	56.914	70.854	68.969	29.593	94.269	37.278		110.189	68.854	11.312	20.005	127.82
	222.913	131.878	59.372	33.81	207.894	70.161		15.969	16.226	30.039	12.045	78.215
	69.232	49.218	69.146	12.32	42.882	14.243		23.121	16.125	29.354	12.524	68.652
	54.906	103.436	60.134	17.23	53.851	62.857		29.817	19.649	47.943	9.845	20.087
	85.142	58.109	61.574	30.987	12.935	125.591		17.417	123.524	169.544	26.684	101.005
	100.374	146.178	121.211	20.935	15.701	82.731		21.557	13.014	68.821	69.025	54.05
	73.52	62.999	89.951	9.465	26.001	79.988		19.502	67.552	145.73	45.081	111.652
	12.168	112.055	77.915	9.504	36.949	20.68		47.891	103.132	53.659	28.277	102.623
	15.386	127.976	124.596	50.09	59.522	14.891		73.939	113.079	16.444	53.215	190.785
	59.999	85.595	24.23	62.893	47.136	14.19		56.883	90.77	82.958	51.346	67.802
	17.307	76.307	39.477	23.406	36.312	14.803		91.408	13.598	37.693	83.604	68.713
	123.181	78.129	42.521	21.441	140.765	97.408		107.204	13.434	56.348	159.671	76.657
	100.826	146.416	19.047	16.317	139.333	86.06		34.331	69.827	38.393	62.857	21.353
	40.676	7.933	45.797	16.125	188.144	218.876		60.206	79.959	146.334	16.233	58.822
	62.874	34.94	208.974	14.007	150.805	31.556		44.468	36.401	49.865	23.786	71.463
	64.5	155.89	82.03	59.186	112.74	88.084		36.94	17.135	67.744	10.36	44.742
	61.422	12.852	31.94	87.694	60.175	117.477		56.764	31.552	47.394	25.808	53.354
	28.446	47.05	144.849	50.94	63.45	38.555		87.872	46.096	100.174	24.645	31.848
	71.105	59.735	99.899	63.41	86.009	66.304		137.312	22.327	13.155	26.038	166.086
	13.894	82.31	141.121	130.553	158.189	125.793		129.538	15.93	44.396	41.17	88.649
	61.247	75.738	118.406	91.076	14.803	61.003		61.326	14.722	22.721	111.049	101.364
	68.114	7.744	91.728	71.835	137.575	23.943		61.211	12.313	30.503	30.417	60.849
	48.229	10.325	17.738	14.653	60.726	24.367		20.192	13.894	37.338	37.114	51.655
	72.984	11.219	99.225	12.9	108.759	133.744		15.48	90.77	23.615	68.479	35.152
	93.023	12.046	113.712	40.383	110.179	49.227		71.401	46.096	49.193	176.92	58.109
	29.536	15.223	64.49	76.622	139.488	55.101		116.304	19.63	130.196	193.029	38.721
	56.065	89.588	333.458	75.528	204.848	53.499		184.924	47.23	55.047	64.576	19.87
	57.012	41.3	123.627	57.842	104.295	59.339		89.208	58.613	9.806	39.612	29.115
	20.942	57.285	17.655	25.872	125.444	52.423		129.346	45.058	11.978	19.505	12.524
	9.46	121.975	100.7	34.632	26.576	39.891		185.937	13.606	98.055	65.118	15.386
	17.605	84.561	75.564	45.089	147.764	14.007		53.379	14.721	31.664	108.039	9.81
	70.985	9.523	66.119	14.722	32.978	36.606		16.317	20.64	150.439	144.579	9.81
	45.409	53.539	38.941	9.504	86.963	75.946		202.085	20.801	161.957	75.552	10.034
	36.161	53.632	72.725	27.547	171.605	128.285		237.83	64.201	83.047	62.349	11.893
	85.523	14.803	64.693	31.067	47.355	9.62		300.593	30.832	48.137	52.761	51.285
	109.771	38.576	99.055	37.357	38.748	62.618		138.577	17.29	152.705	50.065	21.968
	24.095	51.237	23.736	91.534	50.378	40.966		158.995	67.583	79.957	58.507	7.095
	32.437	36.556	131.594	70.728	23.157	16.93		78.522	81.831	86.365	104.468	33.247
	147.982	64.87	44.247	72.527	22.859	135.801		17.605	68.75	89.494	13.765	56.969
	40.507	63.263	43.004	39.185	17.546	89.008		55.48	36.747	48.649	25.478	87.07
	48.922	45.54	89.199	32.252	92.082	91.61		64.566	63.881	36.172	27.165	47.822
	89.084	76.083	33.601	77.821	20.452	37.858		161.772	32.243	60.04	33.546	88.516
	16.77	43.978	50.061	129.903	102.134	27.787		101.17	74.295	55.067	39.429	397.156
	138.697	129.865	36.652	61.688	202.009	43.882		141.983	18.529	63.43	41.641	139.605
	120.884	81.742	59.048	116.756	209.509	59.619		53.208	35.933	21.926	22.368	117.023
	22.822	76.061	115.481	151.992	209.509	19.744		51.79	28.594	120.768	141.295	119.182
	27.694	108.46	142.7	164.918	135.069	52.571		67.758	88.141	58.981	119.081	58.493
	22.213	58.336	79.779	52.026	118.209	150.539		50.641	20.805	350.658	66.08	122.375
	57.582	91.554	159.378	34.158	188.588	84.327		42.324	20.136	149.435	100.903	122.472
	93.976	110.887	68.581	155.938	12.409	50.171		162.45	18.885	71.566	103.285	82.985
	25.293	79.765	73.056	67.025	71.85	56.192		140.537	27.7	135.95	134.213	109.772
	99.016	16.444	10.735	35.109	97.423	76.82		61.802	124.561	41.298	16.233	98.714
	29.654	91.405	16.707	19.447	137.633	27.914		45.329	58.927	107.758	20.084	69.886
	120.382	79.628	11.628	30.377	115.929	65.529		67.303	85.436	83.823	140.335	19.659
	59.886	47.887	78.091	28.38	86.298	73.09		63.781	30.96	144.308	17.228	84.414
	95.181	110.812	118.118	35.445	97.386	49.436		14.648	21.522	86.836	76.372	172.842
	126.162	98.231	84.978	93.661	64.047	46.947		36.383	43.869	15.239	80.151	27.121
	99.941	82.552	47.976	64.944	85.289	61.285		97.155	49.779	83.46	165.291	47.324
	67.596	92.669	48.307	41.466	95.499	74.107		103.097	21.931	63.213	13.47	44.803
	60.231	47.156	79.573	25.321	186.727	142.637		205.186	38.191	69.319	13.155	61.923
	42.118	56.2	56.543	61.495	97.866	144.849		253.736	42.811	110.151	69.968	54.215
	89.084	103.427	22.205	25.306	221.227	170.758		75.152	23.157	52.354	49.669	11.61
	43.522	76.03	21.441	37.633	64.799	47.822		45.59	10.358	78.085	67.132	25.047
	47.991	90.292	68.991	225.783	87.629	48.946		85.297	53.2	50.376	54.019	64.921
	56.819	107.723	25.581	67.97	36.312	8.21		74.28	27.979	62.135	31.947	17.028
	39.844	75.718	36.085	159.412	15.181	11.544		30.967	116.44	39.597	30.226	23.9
	80.354	51.165	23.795	39.729	96.867	28.641		50.689	13.56	72.567	26.664	13.79
	14	57.956	39.411	44.97	33.935	59.718		162.122	19.784	78.449	14.115	11.314
	54.092	33.513	16.166	56.324	23.094	64.492		192.516	17.899	204.284	8.985	18.944
	50.352	67.603	28.766	68.309	36.895	139.3		41.265	12.524	65.298	27.713	46.298
	48.191	106.267	125.449	127.496	20.811	74.998		68.163	35.278	59.564	57.409	47.24
	22.426	212.455	58.564	132.028	20.68	63.956		130.852	13.87	63.213	63.667	52.872
	30.866	123.227	104.803	42.38	30.639	148.244		42.316	71.146	34.421	59.58	65.79
	22.015	76.81	14.835	46.947	25.408	74.122		63.706	62.419	80.159	189.747	46.799
	22.77	64.118	13.134	115.75	12.791	52.493		137.288	77.631	85.487	20.69	27.855
	11.948	89.737	106.43	56.113	51.701	39.112		128.23	43.603	79.628	23.678	18.616
	76.798	26.913	76.959	158.249	15.93	58.509		150.837	17.605	50.095	13.607	35.848
	60.384	11.097	71.994	53.407	85.574	108.789		82.643	54.403	33.085	16.021	15.707
	80.031	73.269	76.154	125.763	147.257	54.663		177.994	16.177	17.646	61.831	13.158
	79.317	30.494	89.489	72.071	105.342	72.117		77.798	16.702	53.453	19.35	12.931
	100.292	132.053	86.151	52.636	16.439	76.67		180.001	12.931	54.959	296.581	10.198
	81.283	145.733	64.813	95.139	26.664	32.148		58.45	50.29	21.01	53.343	14.087
	19.617	59.039	105.206	119.069	12.077	17.23		376.84	92.217	37.467	33.947	42.755
	46.175	86.015	104.987	15.044	56.584	26.394		179.085	76.803	20.514	114.2	79.305
	44.733	48.307	117.892	31.128	9.62	124.691		98.093	16.546	53.049	20.815	59.253
	42.59	35.574	54.92	78.975	15.812	18.89		97.955	13.017	70.73	21.759	58.868
	36.355	105.459	13.924	28.588	25.056	23.798		75.093	36.383	82.779	17.97	58.833
	35.354	103.468	64.664	91.16	19.5	45.668		21.089	77.441	84.376	18.981	35.773
	34.625	58.671	47.041	57.161	11.681	96.095		20.392	95.825	50.791	37.364	72.521
	37.61	107.895	94.307	27.742	99.252	33.102		32.895	59.059	47.23	56.775	16.546
	27.196	56.866	10.468	63.839	52.499	12.791		12.9	76.23	61.441	58.956	11.476
	33.096	16.376	92.263	19.794	15.488	22.055		25.575	20.392	9.122	138.315	8.602
	55.071	18.712	67.559	50.909	44.776	68.343		19.33	18.605	80.386	14.146	9.391
	28.737	16.349	77.291	57.376	30.212	97.609		55.079	26.001	12.785	92.869	11.7
	30.828	94.796	79.389	53.147	66.343	37.499		98.065	95.244	22.111	163.595	12.903
	61.005	97.006	92.478	28.555	91.465	144.804		87.709	47.308	12.929	16.008	137.837
	70.29	29.357	91.128	60.661	103.255	44.875		52.633	88.542	39.616	19.662	56.514
	64.837	87.076	79.062	24.273	66.393	21.528		148.172	28.393	20.801	11.681	28.594
	45.922	56.116	15.795	17.307	26.268	51.857		204.084	29.554	15.694	16.442	15.218
	15.019	50.312	15.93	28.122	37.742	52.752		131.937	23.786	18.605	17.553	21.761
	33.219	74.859	19.621	82.009	46.884	94.039		50.43	25.188	15.956	21.255	10.4
	34.674	112.717	22.371	8.641	15.051	96.522		84.98	21.24	83.115	13.903	26.873
	13.924	74.052	75.1	11.628	13.683	71.747		94.091	67.306	44.926	73.151	38.705
	39.645	101.579	38.893	10.064	12.409	121.455		149.725	38.19	90.074	63.287	131.656
	87.72	33.037	13.358	15.534	12.32	20.668		27.86	40.566	106.421	16.974	76.518
	38.633	106.985	47.617	51.004	16.618	28.795		52.252	75.924	19.948	128.517	39.315
	125.092	86.508	18.09	48.857	13.358	14.243		66.171	27.533	12.39	9.122	58.499
	113.676	80.043	35.477	142.903	10.781	24.107		68.004	87.855	14.146	12.9	23.667
	101.294	142.557	58.082	101.38	28.91	13.901		75.112	58.505	12.9	11.482	70.54
	9.46	132.871	16.97	70.108	9.81	14.146		93.738	43.953	68.482	18.796	23.479
	17.605	79.186	58.23	37.527	28.159	17.316		17.396	32.236	10.878	16.71	65.158
	18.998	71.633	78.904	36.51	16.618	17.401		17.204	128.186	54.289	27.335	106.885
	41.285	80.774	15.392	144.126	60.849	24.416		290.172	120.627	100.193	109.053	150.471
	46.448	12.434	132.795	64.706	39.327	99.305		96.502	49.769	7.092	23.874	18.865
	55.96	22.443	83.621	23.23	19.5	102.557		133.706	52.692	54.003	13.683	45.784
	93.992	56.326	40.174	44.43	14.602	35.278		82.457	20.783	22.899	11.841	39.466
	92.305	4.81	10.579	30.322	16.074	24.34		60.989	75.872	27.155	24.158	33.092
	49.058	3.674	9.267	77.271	30.588	27.708		91.258	24.814	22.574	13.297	20.446
	108.107	21.443	39.17	61.214	16.967	66.119		356.085	12.162	32.748	36.512	29.259
	36.94	38.973	42.511	29.139	10.884	13.953		77.708	13.667	25.57	71.243	80.985
	66.105	24.014	12.906	47.367	21.93	10.034		64.105	20.569	18.08	152.133	28.71
	76.579	19.167	8.385	18.915	18.749	6.937		50.098	11.411	24.08	18.618	63.66
	52.993	20.295	10.361	69.664	34.353	26.169		255.801	9.499	18.565	15.822	82.084
	10.32	21.261	74.719	45.173	50.112	26.729		279.739	11.429	32.419	93.008	56.764
	6.717	25.006	58.894	33.532	16.528	30.663		279.739	55.814	8.47	96.387	9.617
	12.162	32.277	43.292	40.005	12.906	20.142		59.552	10.462	8.514	36.522	46.815
	23.724	87.782	9.62	6.548	11.186	42.719		22.726	23.284	10.735	165.252	8.16
	41.491	4.376	74.521	12.31	60.138	124.573		92.597	32.282	61.738	96.375	10.984
	69.623	13.668	130.888	15.93	25.423	76.583		57.265	64.77	34.054	116.193	23.667
	12.929	6.955	73.505	48.654	19.958	107.997		67.298	29.442	26.922	25.832	26.828
	11.474	8.758	96.805	46.46	12.524	130.071		117.723	18.805	17.135	39.923	9.462
	38.853	6.765	77.936	58.179	21.903	53.885		104.618	21.275	52.713	80.736	17.605
	94.99	15.983	28.989	36.152	34.071	92.271		63.677	25.044	73.065	52.461	11.981
	96.397	23.1	22.269	26.998	11.219	18.97		122.896	27.19	60.04	182.056	8.645
	35.26	11.314	8.604	56.772	10.397	48.134		32.323	13.787	66.643	96.713	10.984
	17.957	37.533	9.62	113.186	29.868	56.714		127.717	15.811	144.579	105.657	7.789
	28.292	16.971	17.211	126.711	14.321	117.833		161.811	12.9	107.514	28.659	23.4
	7.788	37.478	73.822	45.265	71.058	11.697		64.086	30.751	47.23	66.087	96.172
	9.615	3.487	87.209	41.989	38.19	9.806		57.039	52.44	108.469	14.708	233.269
	120.587	2.467	82.745	77.904	47.167	9.235		134.708	38.862	11.411	39.07	51.99
	8.979	5.303	18.414	62.202	13.134	104.202		123.082	13.56	40.457	41.327	42.359
	257.015	1.734	30.322	170.013	18.414	118.948		229.895	48.535	79.288	108.929	115.566
	20.925	6.217	10.198	39.682	13.155	17.708		101.866	123.151	8.678	22.524	197.934
	36.81	3.87	10.677	28.581	76.81	65.496		65.425	33.54	11.022	30.5	51.79
	18.565	10.106	38.403	101.818	62.741	32.327		148.124	87.724	28	87.154	17.733
	22.426	3.829	50.836	62.285	11.48	61.003		73.896	128.143	29.025	25.674	90.266
	38.984	9.339	20.307	57.708	15.32	41.325		246.015	21.153	41.752	112.089	11.314
	22.721	27.121	18.614	27.22	13.134	114.345		56.414	16.52	47.331	8.606	11.215
	27.441	29.545	44.452	17.409	10.503	34.53		120.011	12.785	81.999	13.877	9.501
	48.687	55.63	71.623	118.301	12.791	19.326		28.594	13.867	20.242	109.082	9.501
	48.392	85.792	58.14	38.852	17.605	17.646		53.2	11.022	32.308	50.033	18.106
	56.085	10.681	25.056	119.265	18.151	57.279		47.004	39.09	12.916	35.158	63.735
	37.693	32.95	12.409	82.328	19.64	24.099		17.204	18.334	12.313	155.518	18.469
	20.731	37.571	9.62	43.484	10.884	99.228		63.863	14.595	14.696	13.796	20.155
	42.94	15.301	75.715	21.649	15.48	96.906		59.421	35.018	85.262	153.902	25.443
	44.914	17.852	39.382	33.806	62.754	103.715		127.89	11.18	27.787	12.909	12.788
	50.169	13.348	12.32	63.35	13.422	34.271		37.227	60.622	39.234	15.044	81.118
	78.819	4.224	53.596	10.4	44.751	69.66		228.811	14.416	16.52	15.395	42.785
	69.702	3.466	40.977	12.925	75.659	25.516		105.41	31.763	76.699	111.764	32.698
	52.725	2.729	76.748	92.013	86.043	214.278		83.1	55.768	17.307	49.385	19.33
	56.085	57.564	145.301	46.462	32.389	66.937		38.198	72.994	16.698	81.829	14.187
	19.393	109.976	32.749	39.133	17.23	36.669		87.123	115.538	21.362	23.49	12.964
	41.97	22.873	69.7	52.953	46.157	12.238		92.788	22.015	31.02	39.484	13.87
	197.611	11.559	11.954	46.085	81.265	60.28		57.863	32.453	20.529	198.173	18.609
	209.632	3.054	14.191	73.116	15.583	9.499		144.808	36.355	43.666	60.575	22.904
	71.752	7.355	10.781	13.011	13.021	7.297		190.091	11.134	99.764	23.786	36.487
	36.283	56.553	48.803	15.015	110.407	70.541		20.805	29.354	9.867	50.157	28.124
	54.696	114.687	110.839	49.986	47.577	54.825		42.368	20.514	14.087	52.816	13.601
	19.095	2.341	19.64	17.536	33.057	111.153		318.789	24.999	15.575	91.378	8.41
	49.615	4.762	42.719	30.821	69.433	115.002		228.222	47.3	13.867	20.063	21.659
	23.874	9.031	56.376	41.626	9.147	75.768		61.243	28	34.572	76.6	26.001
	21.569	12.964	91.13	51.987	7.933	62.658		140.355	66.393	37.499	41.298	12.39
	66.091	10.433	81.045	45.69	7.352	186.15		71.85	106.441	74.175	52.594	17.139
	44.43	16.348	84.309	50.31	11.703	116.18		43.292	13.044	13.894	14.205	146.921
	82.864	4.438	124.498	49.828	12.906	170.343		56.954	26.255	21.24	25.416	68.761
	49.413	1.633	29.967	45.868	8.21	14.696		138.621	40.593	10.42	105.906	7.931
	39.823	8.843	18.09	17.968	12.409	60.979		62.622	29.282	24.922	17.65	73.861
	57.485	62.23	23.627	18.783	15.002	116.324		82.223	70.52	23.473	17.139	26.721
	75.18	8.758	97.787	47.755	12.9	18.163		32.208	19.799	31.924	22.513	51.215
	26.311	1.938	33.513	118.151	12.323	19.095		81.214	53.953	14	18.944	35.092
	91.742	9.5	64.251	90.113	69.123	20.64		21.297	77.137	22.795	51.338	34.675
	85.677	18.852	38.962	65.676	52.622	34.884		196.443	52.499	35.545	17.139	68.141
	98.263	13.987	73.01	36.981	13.358	68.934		93.349	62.449	57.851	13.683	21.569
	145.847	13.88	12.32	33.882	7.352	14		63.263	29.733	25.872	10.198	18.525
	94.99	41.312	67.676	41.925	9.504	18.981		111.824	32.964	39.644	13.683	34.572
	83.65	6.34	19.046	19.09	9.307	86.213		370.3	110.831	45.976	17.417	91.633
	44.204	14.108	69.504	20.145	16.125	44.753		68.869	68.324	12.705	18.288	22.194
	96.418	15.049	34.439	65.839	11.576	44.794		313.047	12.165	48.134	12.964	242.248
	60.575	15.37	45.918	49.682	69.743	21.528		85.197	53.643	44.374	11.77	33.203
	127.076	40.736	17.549	48.654	67.974	14.722		89.724	44.803	44.396	12.524	41.925
	25.163	38.05	47.332	29.733	99.966	19.037		154.501	37.028	41.566	14.552	30.595
	17.84	55.954	17.717	15.807	130.633	8.484		28.477	85.297	36.507	15.707	46.931
	70.567	21.578	14.007	31.763	75.089	7.794		37.61	24.33	52.121	166.443	31.769
	60.421	32.62	20.087	42.696	75.689	24.095			37.709	15.746	139.576	24.218
	23.786	48.295	43.159	63.117	15.044	202.371			21.128	61.289	102.654	21.517
	107.264	36.585	21.275	86.228	39.411	122.12			128.87	16.363	64.948	24.324
	57.626	4.438	13.605	51.278	9.845	95.153			18.146	21.634	95.357	181.706
	42.964	15.543	31.5	18.749	10.42	25.656			16.546	24.51	15.814	35.636
	46.522	28.712	145.248	27.944	12.852	151.128			32.969	14.696	14.321	18.284
	23.256	64.33	73.922	26.695	18.29	57.723			65.654	86.399	14.722	12.9
	22.71	33.21	201.146	14.321	9.618	64.5			60.605	13.598	14.699	18.142
	44.878	9.692	103.266	15.534	15.93	15.6			60.97	122.652	33.465	12.522
	57.581	20.556	15.493	27.426	13.104	10.34			17.417	31.008	288.165	14.796
	49.122	23.594	28.757	11.011	11.701	7.74			61.762	12.9	13.897	12.9
	45.881	21.753	63.468	14.232	22.956	33.196			106.902	76.579	78.635	22.426
	86.981	15.749	46.152	21.353	26.936	11.474			139.276	65.383	24.544	10.32
	68.836	72.534	107.806	24.211	32.339	21.926			49.653	42.481	78.612	10.198
	46.482	9.077	75.891	28.643	37.272	26.594			148.815	134.79	27.742	12.071
	48.086	10.382	61.326	24.8	72.862	58.99			99.996	35.459	40.024	23.156
	42.359	9.489	76.545	42.929	47.504	24.095			121.176	104.768	41.548	30.96
	13.13	9.709	29.67	35.544	14.623	7.354			124.561	43.936	69.951	112.011
	85.998	8.614	28.174	40.507	53.262	15.215			69.35	13.606	15.93	20.801
	74.998	40.44	20.442	25.122	142.535	68.467			86.998	16.363	15.022	82.851
	11.314	43.868	37.723	30.785	18.471	5.439			17.605	23.363	10.881	45.653
	17.074	5.136	102.557	15.969	13.019	6.641			13.763	18.06	54.961	64.563
	53.338	34.518	77.924	40.099	35.104	55.814			124.697	13.787	38.324	99.719
	81.722	2.313	112.2	91.226	30.098	55.911			85.713	7.74	33.942	109.285
	16.9	5.527	174.137	59.15	17.077	39.74			87.709	11.213	12.407	53.632
	15.044	3.289	23.615	80.818	31.174	53.858			47.472	13.76	14.321	45.792
	59.626	27.089	20.15	213.424	36.057	24.211			448.783	63.08	12.672	35.843
	112.707	27.216	37.209	50.222	55.203	73.135			92.904	57.691	26.331	69.244
	10.465	16.701	65.298	107.61	31.726	10.965			181.018	24.688	53.941	157.733
	70.068	7.82	55.482	65.705	17.902	11.948			67.188	29.204	125.446	157.733
	41.69	11.869	58.211	95.873	5.511	7.978			59.253	198.876	110.439	59.843
	14.239	11.028	64.615	27.914	38.962	15.858			110.335	73.965	22.685	36.103
	60.219	9.774	33.403	42.049	27.744	53.188			62.723	30.805	76.154	73.66
	142.225	4.81	58.05	29.025	122.399	24.955			154.642	30.412	54.241	64.629
	97.136	8.971	124.201	10.4	119.685	16.177			79.16	92.235	51.033	14.835
	77.036	16.766	59.763	17.028	44.769	10.034			70.54	139.339	37.819	84.351
	70.86	4.662	17.427	12.897	67.109	20.15			11.476	12.323	124.445	11.476
	20.644	8.262	20.077	32.964	122.598	13.351			30.045	16.23	50.407	24.085
	70.556	21.449	23.256	52.784	100.949	13.713			20.68	20.088	85.954	59.452
	21.505	17.554	74.279	29.339	103.111	51.362			44.231	65.628	72.69	41.512
	38.004	2.596	69.367	22.529	18.25	38.186			227.571	31.394	97.387	40.757
	60.579	3.558	29.215	79.459	14.161	86.077			245.25	38.401	11.215	25.872
	37.217	13.458	39.98	80.198	27.213	23.256			22.431	32.256	14.623	19.87
	26.218	11.097	16.066	109.891	117.871	11.213			42.399	66.368	89.662	76.709
	54.308	11.37	72.699	73.087	42.118	10.776			50.098	24.284	138.681	30.008
	52.365	4.308	57.409	199.667	75.985	22.194			62.605	17.886	41.97	15.022
	23.479	19.885	38.251	8.641	47.089	30.149			11.95	13.87	17.617	66.644
	27.445	35.237	49.627	22.305	103.958	58.004			18.47	65.583	20.15	91.626
	104.512	17.601	75.563	11.893	131.379	139.728			16.021	44.914	114.537	82.313
	38.004	19.309	71.908	16.538	15.386	65.489			8.772	12.316	83.118	10.5
	109.46	3.653	21.441	11.535	17.711	73.146			9.501	21.216	13.281	19.502
	39.013	11.304	21.441	17.077	38.115	78.967			14.423	10.013	68.394	23.241
	69.861	7.863	50.396	16.694	18.072	115.64			10.638	35.943	30.212	49.732
	73.996	11.674	68.031	30.239	19.409	78.279			15.002	66.524	22.032	29.445
	103.937	16.897	87.302	44.059	17.077	79.428			7.854	28.852	34.063	26.707
	88.034	27.396	24.324	122.455	23.148	38.365			16.366	47.341	18.469	19.659
	44.247	22.403	72.53	90.113	15.48	21.569			15.507	37.975	83.438	34.675
	84.998	20.591	92.792	68.08	12.964	19.611			12.226	17.746	54.703	10.5
	126.935	9.915	87.206	231.344	17.028	27.787			15.243	21.089	133.938	11.95
	11.264	23.544	8.979	78.904	14.625	26.881			13.234	14.648	125.675	43.522
	17.031	40.465	37.07	78.637	43.015	35.636			9.675	11.182	85.505	75.847
	17.65	52.487	40.648	91.202	16.93	42.175			10.42	57.691	103.655	18.243
	93.796	51.526	21.5	77.104	11.538	5.841			15.058	45.419	81.077	38.44
	32.901	42.461	86.107	14.087	24.333	12.698			13.713	27.445	193.681	66.15
	95.744	43.455	41.706	13.996	12.318	10.965			13.464	15.861	100.979	19.786
	33.237	20.17	90.709	51.604	50.003	11.61			143.396	23.62	59.571	92.882
	63.093	16.128	51.543	87.182	61.122	9.302			94.236	46.601	63.117	37.848
	133.065	4.588	55.288	98.666	13.953	13.351			134.343	20.716	39.4	21.981
	165.053	9.03	95.364	45.173	14.623	12.672			130.978	37.078	29.107	24.897
	41.163	90.3	86.924	217.388	18.888	26.198			49.271	6.203	81.65	55.278
	75.71	52.498	46.355	78.46	10.32	120.317			134.657	40.64	76.677	93.934
	77.033	129.853	54.662	16.967	9.504	82.367			86.199	74.28	77.123	200.486
	58.474	139	21.926	13.458	13.924	35.935			38.469	91.236	65.705	150.65
	45.133	6.121	32.109	11.975	10.325	11.57			46.458	42.992	99.559	123.523
	54.253	2.667	68.163	10.064	18.09	15.331			40.511	202.612	69.603	75.896
	29.423	130.347	10.356	14.849	12.906	24.324			17.29	24.466	44.882	62.723
	66.374	68.136	18.805	13.804	12.118	91.565			27.793	100.262	246.32	121.649
	62.083	21.5	96.658	10.773	36.025	87.345			114.521	22.081	30.967	148.042
	35.31	60.494	10.498	120.78	31.94	49.253			208.568	25.776	126.801	91.508
	126.584	44.162	12.407	113.406	13.953	110.327			23.256	98.906	180.616	92.104
	54.437	49.816	16.317	71.155	25.669	56.341			9.264	10.358	83.968	12.043
	72.199	21.773	7.929	56.334	24.107	66.22			6.935	9.302	69.555	17.417
	145.869	60.5	22.508	39.896	33.54	97.089			11.541	21	16.138	73.451
	110.218	65.705	49.56	86.706	21.295	106.409			51.107	17.355	14.849	63.59
	74.633	64.454	95.475	85.399	71.078	52.762			90.254	148.603	10.322	88.516
	49.241	75.665	22.822	84.702	32.952	73.88			18.787	57.176	9.732	51.417
	17.355	76.094	32.635	103.556	30.751	59.738			119.974	74.681	8.484	19.615
	131.282	87.703	102.632	19.809	46.638	45.774			32.895	87.872	15.956	17.522
	66.588	32.419	15.707	16.782	127.933	8.159			60.11	76.969	61.243	50.098
	39.653	37.219	10.066	23.798	19.336	6.88			43.147	76.178	38.401	40.676
	11.858	16.698	11.264	20.686	34.734	15.019			67.232	42.306	54.164	9.304
	8.082	8.854	15.058	27.128	35.422	15.575			153.152	104.357	97.338	35.621
	19.634	28.292	62.455	48.253	36.179	62.069			66.435	72.414	27.201	57.089
	11.981	82.564	18.06	53.885	24.953	46.994			44.406	37.499	21.088	13.713
	18.209	98.24	35.801	38.374	15.866	87.319			72.383	69.154	13.56	18.334
	12.226	77.352	46.512	41.088	15.512	166.549			12.9	34.109	10.64	14.316
	85.998	69.17	42.698	111.523	12.046	125.41			41.289	29.354	143.816	10.881
	106.719	111.95	29.354	101.88	33.413	13.155			34.45	14.721	18.247	13.464
	20.446	80.39	34.282	144.619	27.004	13.598			31.208	40.244	56.779	85.414
	17.733	49.769	8.385	42.476	14.423	23.91			23.865	43.268	56.077	99.295
	25.662	104.793	40.099	60.525	28.185	18.998			25.005	72.802	10.068	17.921
	43.19	21.275	23.724	136.565	8.474	67.537			121.811	40.53	47.777	24.211
	15.507	108.183	20.942	53.453	12.168	40.566			95.481	41.369	21.761	14.108
	69.68	26.192	53.383	66.494	10.42	22.327			59.133	71.202	40.575	25.546
	34.803	39.891	50.279	109.478	40.449	17.135			42.256	70.378	37.346	49.682
	93.934	28.588	34.411	10.468	18.334	8.854			9.808	85.179	32.924	18.605
	100.406	24.627	98.788	94.835	10.34	12.9			19.407	98.089	188.536	43.224
	129.428	28.627	33.452	16.618	73.922	60.914			32.635	170.744	13.713	107.547
	144.578	76.424	52.177	30.751	54.561	38.652			33.047	81.579	11.541	66.324
	105.228	75.131	16.317	12.906	64.28	10.066			82.909	55.847	11.893	31.014
	21.088	12.313	17.367	19.361	41.13	15.504			51.683	44.629	11.097	62.888
	47.334	46.152	17.793	100.721	63.275	18.223			42.443	86.839	15.507	61.261
	23.4	15.019	75.096	23.943	18.09	12.929			201.814	14.722	25.049	62.249
	40.793	103.428	42.57	47.253	8.604	29.816			115.397	23.895	44.878	40.575
	24.28	76.779	30.012	69.017	11.219	46.86			96.348	55.321	52.132	148.514
	197.889	53.69	25.443	49.637	17.422	42.481			42.882	36.81	80.514	21.659
	85.766	44.229	13.434	93.913	41.461	36.568			44.214	44.728	56.354	130.07
	40.575	71.711	160.967	89.324	24.953	34.593			15.386	41.28	12.407	81.831
	74.246	40.429	12.721	126.636	52.022	43.258			43.822	34.185	11.041	34.083
	111.814	50.065	13.06	12.39	37.712	26.936			137.523	21.654	11.264	34.792
	55.369	27.734	11.893	80.635	91.465	81.638			17.991	23.256	42.368	18.882
	52.177	29.054	112.978	63.607	52.402	25.41			59.372	45.653	55.037	19.803
	94.87	44.396	85.54	89.711	123.189	61.464			64.284	55.672	14.187	18.227
	18.924	61.926	30.406	22.968	226.449	20.242			51.64	61.205	18.616	7.847
	119.268	39.87	28.171	14.161	80.279	125.983			39.042	177.756	13.06	16.702
	156.284	50.886	57.978	73.541	16.77	82.229			12.964	160.976	13.601	17.29
	25.662	34.022	42.707	55.65	18.163	20.68			22.904	89.047	105.157	37.346
	23.265	14.236	17.027	45.173	28.975	10.391			29.561	109.125	90.581	20.446
	37.789	36.739	25.961	65.444	24.834	98.72			16.344	59.487	58.752	15.791
	15.218	136.705	23.256	38.791	103.594	90.77			13.158	45.718	15.019	12.05
	32.698	16.698	56.949	88.71	47.573	83.962				18.881	92.405	9.501
	96.191	50.644	18.08	158.06	98.983	91.217				19.326	27.735	9.617
	19.859	72.699	46.312	125.944	8.604	227.801				15.019	19.23	34.407
	35.643	42.726	32.51	55.214	16.235	92.729				22.362	43	13.354
	59.197	60.575	48.008	58.407	105.36	19.799				64.706	22.508	17.921
	39.653	150.782	13.789	150.858	88.86	31.832				28.628	31.008	29.317
	51.933	57.524	9.806	46.44	91.422	13.434				43.513	75.563	27.914
	82.73	16.609	23.309	68.737	160.818	52.064				21.569	89.477	34.148
	80.789	64.966	33.6	19.922	58.207	43				41.999	142.669	26.873
	70.414	75.523	32.256	22.804	112.914	28.079				116.859	65.556	35.56
	159.03	87.787	60.804	19.5	110.608	19.23				117.301	70.574	45.686
	105.374	79.512	46.574	67.525	84.355	183.891				52.816	160.193	124.754
	103.415	24.34	31.916	15.865	85.154	15.997				82.367	52.847	77.741
	6.936	18.861	13.531	13.874	34.675	17.427				61.369	22.851	10.778
	24.363	10.066	80.872	17.294	30.546	15.746				168.616	67.157	34.375
	12.407	88.178	9.335	17.415	135.574	20.821				93.293	99.892
	12.17	65.071	7.998	111.949	126.973	14				94.091	10.498
	17.42	33.463	12.721	59.466	14.316	12.9				102.405	13.598
	49.248	100.561	7.153	43.484	30.799	18.861				146.497	17.331
	72.286	101.829	17.884	123.135	11.476	45.288				31.493	44.21
	84.138	22.044	17.367	16.551	26.034	15.044				15.861	29.915
	43.015	12.77	11.841	33.818	43.198	43.651				120.432	17.2
	131.037	33.793	63.486	26.576	52.753	15.215				64.72	12.403
	220.474	36.294	43.824	26.944	43.198	20.498				61.796	8.113
	74.96	14.645	45.743	18.97	21.981	66.937				31.913	15.48
	92.02	12.323	14.335	143.034	9.462	66.793				35.466	14.183
	66.667	20.297	135.776	17.079	104.998	39.765				36.025	60.451
	57.303	10.029	166.386	12.98	116.617	10.356				125.18	40.429
	54.254	62.034	16.317	15.099	63.863	15.746				39.268	13.76
	59.13	33.23	24.897	13.297	30.509	19.101				103.183	8.41
	60.912	25.57	8.773	30.067	9.808	22.612				42.118	105.811
	139.343	21.517	21.627	10.468	8.385	70.834				17.074	27.213
	48.453	28.639	9.302	59.095	11.215	130.553				14.648
	21	59.707	17.636	17.605	29.204	31.162				11.998
	42.782	88.48	53.922	15.48	62.907	76.772				7.694
	92.917	77.519	34.662	39.99	39	43.651				15.534
	49.058	41.423	24.667	18.09	41.521	52.762				89.662
	63.266	81.863	43.411	9.867	14.239	34.71				44.125
	23.164	76.617	13.297	122.692	29.032	31.493				15.047
	30.258	59.396	88.167	45.908	44.804	12.522				40.394
	47.512	111.378	112.826	51.633	41.285	8.678				28.373
	30.16	94.153	103.944	37.83	8.773	32.87				75.219
	18.97	58.745	15.28	14.728	50.641	35.481				10.881
	28.563	45.288	81.057	38.382	29.36	51.199				44.285
	26.828	75.563	26.541	47.002	14.648	39.808				40.594
	50.648	55.067	23.478	54.643	48.362	15.058				48.086
	51.797	47.37	30.115	30.115	87.083	96.948				43.803
	46.242	76.186	31.287	52.273	81.718	78.076				112.369
	60.175	70.917	33.297	21.059	15.099	14.696				80.625
	35.803	60.86	39.283	76.154	13.763	22.194				6.935
	22.368	31.994	21.295	187.757	86.584	100.679				14.891
	15.699	5.439	66.878	32.411	93.284	7.692				75.236
	94.872	11.538	20.856	74.692	160.889	9.122				46.458
	37.941	91.002	44.709	16.93	33.447	114.194				73.6
	44.178	78.566	18.412	40.052	21.373	21.083				21.778
	23.076	7.297	36.946	9.122	16.241	24.218				121.649
	18.531	26.028	39.191	12.672	21.28	48.585				156.064
	37.125	5.769	25.244	52.245	78.612	86.307				37.731
	32.327	15.858	70.237	61.937	70.776	55.339				73.151
	67.833	13.434	74.564	74.122	73.841	33.716				58.404
	128.127	27.155	14.737	26.453	163.973	64.218				58.042
	67.004	19.691	13.667	15.587	183.131	62.265				12.524
	27.205	25.293	12.272	35.403	101.173	89.704				18.163
	12.075	20.037	26.84	11.628	57.285	55.288				49.779
	17.652	16.94	62.034	21.059	86.836	52.925				116.452
	14.188	45.155	12.705	13.155	68.653	52.177				114.267
	39	18.06	13.996	18.253	103.574	65.501				15.93
	53.843	43.852	10.878	26.687	137.342	54.009				156.568
	25.823	17.708	21.497	48.752	115.796	26.001				173.598
	24.15	20.64	16.966	21.93	120.171	14.708
	121.365	56.085	12.9	90.64	119.668	15.113
	91.714	47.943	37.937	153.594	11.215	18.255
	12.167	69.708	38.709	50.12	92.163	48.586
	155.743	13.127	78.12	62.64	129.66	28.487
	69.36	14.846	64.902	70.182	17.605	42.16
	75.951	10.946	27.949	25.408	13.297	27.186
	118.341	38.403	27.802	78.851	131.025	67.303
	48.704	94.6	20.397	82.854	13.894	51.761
	27.341	29.291	15.058	50.169	44.063	15.852
	142.821	26.702	12.9	10.468	40.615	8.11
	18.229	25.526	15.82	8.773	7.742	11.943
	16.77	52.298	93.284	135.777	42.008	3.1
	20.139	23.786	22.194	130.338	12.073	7.295
	66.516	28.845	36.143	72.035	16.9	188.283
	69.379	37.215	26.795	196.233	23.962	70.668
	12.916	28.484	55.827	5.16	16	94.121
	60.227	13.598	38.834	7.933	28.839	81.022
	34.614	43.292	17.546	10.4	73.925	8.654
	43.298	66.322	26.9	128.761	76.788	32.437
	44.412	66.421	61.171	33.48	117.14	91.201
	64.092	95.445	103.218	53.906	109.211	101.175
	31.738	55.448	30.045	45.603	15.587	65.282
	52.76	62.123	75.562	63.521	81.323	26.872
	83.733	50.035	10.466	145.126	69.147	59.326
	58.803	123.496	12.709	45.288	31.086	69.06
	61.828	67.782	16.77	36.515	25.806	79.027
	68.83	73.644	9.589	56.265	30.649	68.442
	65.947	34.141	16.12	84.327	39.606	42.994
	62.329	22.241	92.464	228.015	51.09	99.436
	30.221	25.423	21.994	70.456	134.983	123.809
	13.438	80.053	25.101	71.994	79.235	16.425
	78.368	21.968	69.546	88.516	88.949	181.089
	71.571	105.553	69.008	71.202	32.391	80.289
	93.108	26.121	53.799	139.166	29.473	9.589
	61.233	30.115	59.97	56.671	99.559	8.11
	108.742	10.325	81.773	91.18	120.487	17.194
	81.892	11.544	129.916	146.59	92.17	40.14
	101.709	12.906	24.941	73.116	24.632	27.963
	32.144	36.172	50.273	309.294	32.789	64.849
	40.79	20.793	40.079	307.26	10.881	12.066
	66.561	60.32	24.099	339.691	56.007	22.697
	32.082	71.038	23.249	64.455	73.298	40.369
	33.793	37.748	21.479	15.969	64.063	80.089
	27.697	19.046	20.65	18.243	52.075	10.316
	53.175	40.614	12.803	31.067	60.32	11.693
	57.912	50.831	50.906	30.115	50.758	7.095
	60.87	128.077	36.486	13.849	85.889	16.357
	28.98	34.039	23.943	16.881	61.58	10.459
	93.807	31.836	110.598	90.109	104.154	22.186
	154.265	48.529	40.485	88.896	110.994	46.907
	291.756	83.904	29.928	20.801	15.507	57.504
	88.847	67.816	57.541	8.605	133.731	95.245
	157.518	85.2	85.883	10.579	39.606	64.843
	74.153	7.696	21.759	43.651	58.525	83.404
	96.533	72.343	14.418	56.007	27.922	59.475
	11.283	49.375	60.685	11.411	37.623	99.589
	35.825	34.77	39.133	32.385	103.064	67.982
	21.441	90.227	38.822	21.441	38.517	62.054
	13.56	49.376	132.594	29.151	57.091	11.693
	12.9	83.32	130.172	15.48	58.96	59.22
	48.941	42.659	22.194	111.957	64.52	38.849
	77.562	23.907	74.245	64.767	77.096	59.543
	5.64	172.166	28.824	60.489	84.579	8.597
	188.556	50.861	99.097	21.93	22.365	17.28
	98.784	57.417	20.43	10.374	37.623	24.798
	130.496	52.09	91.592	93.391	68.616	37.94
	32.914	74.625	18.749	18.637	22.044	56.302
	93.342	60.677	40.265	37.788	22.722	20.037
	37.468	119.752	17.174	50.085	21.672	24.931
	63.21	15.223	25.291	57.939	24.632	10.874
	65.818	16.235	17.568	120.916	76.285	25.563
	61.495	28.014	96.804	14.645	48.086	27.897
	180.829	58.755	62.565	34.057	115.717	11.209
	191.74	20.243	177.004	43.767	56.819	17.065
	56.685	5.319	125.503	44.845	83.946	72.389
	83.603	11.186	15.058	42.107	34.343	15.21
	161.155	8.385	73.212	85.362	34.257	11.01
	77.467	13.297	36.212	16.571	30.412	20.776
	8.654	14.961	21	18.346	13.606	12.672
	11.279	11.219	44.162	17.921	15.047	11.693
	91.701	22.634	69.922	21.128	49.151	7.55
	85.084	19.336	19.177	27.742	19.803	14.308
	88.844	8.859	25.443	25.337	57.94	8.597
	41.972	6.084	54.44	87.219	19.33	8.597
	42.207	11.097	59.298	50.564	23.241	122.961
	52.455	12.17	67.722	19.645	20.569	16.152
	44.271	57.763	72.527	46.393	12.316	139.508
	68.335	60.592	28.989	22.065	15.315	53.903
	117.044	171.589	32.043	21.399	15.93	21.146
	108.35	36.025	103.079	10.374	69.469	13.862
	208.558	40.9	86.497	29.225	33.855	10.42
	156.084	30.808	52.653	17.23	91.637	15.812
	73.711	27.708	44.162	32.462	50.046	59.939
	105.048	27.554	14.595	21	82.493	136.224
	60.641	51.155	52.002	16.533	157.715	167.693
	59.749	54.882	20.801	17.76	23.241	139.508
	9.272	44.696	77.615	25.516	120.76	13.429
	136.25	40.109	90.337	33.297	12.721	15.379
	149.185	54.207	63.328	86.149	116.532	21.561
	40.011	39.133	60.794	86.237	11.476	11.176
	9.845	131.218	16.967	83.726	45.598	8.773
	14.205	22.194	26.469	46.512	39.774	12.036
	31.861	37.357	28.989	30.067	78.485	74.774
	60.267	21.251	12.964	45.521	39.802	112.572
	12.067	42.24	15.48	79.104	51.033	86.949
	6.45	26.169	157.465	68.552	22.431	86.215
	12.721	13.545	110.135	49.346	18.716	73.357
	4.651	40.284	72.653	100.006	12.17	92.665
	12.672	54.337	111.926	64.151	92.35	38.721
	8.576	65.393	105.188	94.34	11.998	100.589
	7.975	59.27	168.017	58.562	47.682	70.485
	34.484	83.475	17.546	29.733	123.793	124.265
	71.807	20.525	129.598	34.961	49.038	46.512
	155.342	58.944	21.353	82.115	51.618	85.906
	7.625	19.101	15.694	63.353	41.999	141.486
	45.083	33.021	21.275	86.237	45.8	189.259
	73.344	40.27	9.122	127.957	67.6	143.031
	51.087	216.291	7.74	53.952	45.72	101.683
	104.333	51.143	11.681	25.22	20.61	14.321
	31.913	38.641	222.569	21.589	7.4	19.03
	50.466	55.175	77.668	15.6	36.674	22.891
	68.564	117.313	141.765	10.984	27.337	217.166
	16.533	51.432	103.787	11.999	60.244	13.995
	24.092	10.397	84.009	21.33	50.157	15.991
	22.755	67.141	112.998	11.283	68.713	14.146
	29.683	49.712	42.55	15.266	37.623	16.425
	29.974	49.89	55.53	10.677	73.62	10.942
	67.086	84.837	64.5	16.368	105.522	15.21
	25.27	57.405	73.337	17.057	24.284	119.65
	91.005	47.636	57.647	24.082	39.391	133.107
	112.98	54.419	107.566	25.614	62.231	109.422
	27.281	28.924	13.953	15.531	54.164	132.617
	52.245	36.189	133.626	49.952	65.651	78.534
	8.489	63.182	84.127	41.681	20.787	87.739
	9.793	86.318	63.328	51.495	14.003	109.993
	13.615	43.061	131.466	37.403	12.903	41.622
	42.025	47.002	93.202	47.617	9.617	46.264
	60.354	56.027	155.079	52.022	15.218	64.581
	45.375	46.662	128.515	10.374	52.121	92.665
	46.617	25.086	96.991	13.374	117.367	31.529
	53.147	59.47	125.15	163.108	44.239	42.167
	179.663	29.868	132.192	56.994	51.1	60.185
	8.605	247.172	166.15	37.571	82.663	58.517
	10.093	34.057	55.395	16.571	41.826	13.782
	9.761	42.091	25.047	10.5	20.731	9.259
	7.049	76.709	65.701	8.786	68.394	10.494
	9.969	77.915	13.894	8.485	17.174	9.496
	40.746	36.312	28.845	16.727	18.805	19.453
	58.748	15.701	24.914	12.951	20.392	12.39
	61.856	22.822	109.285	14.721	9.617	14.205
	148.257	36.148	36.691	31.121	18.616	7.295
	10.32	113.841	106.227	33.276	47.583	11.943
	7.767	95.524	49.828	66.397	54.034	8.511
	10.093	56.612	91.817	76.847	72.989	15.805
	15.652	61.19	10.075	9.823	127.078	9.122
	20.68	100.471	162.115	13.122	92.02	15.805
	23.716	95.063	59.073	11.264	32.755	19.088
	9.164	28.159	90.576	9.632	70.104	46.341
	18.97	19.865	105.827	7.74	89.544	17.723
	77.936	52.784	129.887	6.728	184.025	120.202
	79.27	36.758	60.175	13.037	153.939	67.938
	24.822	21.58	42.882	9.515	84.652	75.277
	89.155	13.162	59.2	42.648	57.581	46.024
	120.973	19.105	12.964	22.415	69.484	140.319
	48.973	30.115	95.364	12.9	96.287	168.804
	71.342	57.133	10.638	27.426	61.657	9.139
	16.933	15.512	25.606	22.39	56.636	145.312
	14.961	21.251	10.4	20.488	28.588	90.285
	103.882	116.209	16.77	17.886	38.938	75.07
	12.311	20.15	22.529	39.98	83.686	83.952
	15.002	13.106	21.892	24.998	88.279	44.016
	11.77	79.277	85.413	15.07	14.721	56.093
	8.26	116.756	13.468	21.589	15.002	42.336
	9.867	25.012	178.603	10.677	17.708	18.255
	16.444	56.612	83.202	11.032	120.514	112.005
	41.406	48.151	20.68	10.034	18.861	17.422
	35.334	22.205	119.977	11.022	102.083	7.792
	32.889	29.593	136.74	16.444	40.409	9.62
	56.276	59.186	85.511	14.208	20.037	13.874
	67.516	35.653	111.777	13.683	46.615	87.087
	10.198	30.322	48.56	53.972	18.525	42.24
	17.282	73.263	71.697	8.615	41.929	13.106
	80.078	30.494	75.528	18.605	22.948	7.402
	22.023	27.765	83.939	50.413	55.47	14.495
	63.972	67.466	57.3	76.285	68.126	101.84
	40.679	15.488	22.822	56.709	103.229	75.134
	234.748	43.433	73.303	14.849	24.08	13.605
	14.871	73.101	76.622	47.861	55.695	70.098
	129.356	48.253	68.382	80.123	50.747	23.248
	23.3	47.845	65.777	18.346	25.418	30.311
	62.609	54.383	113.784	87.99	46.734	82.098
	13.06	35.287	94.382	52.154	20.058	10.643
	30.588	15.701	66.644	70.305	9.806	8.678
	87.611	15.614	185.478	56.891	19.78	16.125
	68.055	135.263	122.38	39.09	26	18.749
	62.455	28.387	16.82	46.712	11.411	12.229
	14.116	3.225	8.654	39.218	24.627	12.32
	10.812	9.465	20.026	49.227	11.18	19.617
	13.924	10.4	15.956	27.742	32.25	18.871
	49.266	20.801	19.047	29.593	47.487	14.243
	43.432	100.11	10.32	48.733	42.988	39.664
	41.058	67.278	61.947	53.731	13.787	46.535
	27.38	7.095	36.51	61.95	13.894	55.769
	56.914	12.32	110.97	9.823	9.73	83.182
	102.911	17.209	53.702	10.897	10.356	49.045
	57.012	10.965	10.32	15.045	15.504	96.065
	15.099	121.245	11.893	45.202	41.752	96.065
	19.047	85.187	17.546	31.782	19.799	13.297
	29.88	39.98	9.302	11.77	5.841	12.528
	72.2	25.086	20.801	49.376	7.398	18.293
	103.574	23.674	32.25	11.232	9.615	9.504
	229.971	23.363	47.239	67.34	9.302	14.423
	12.311	20.686	46.904	36.532	13.378	21.158
	53.147	12.118	62.402	36.08	17.617	19.046
	98.009	17.738	17.921	11.681	66.192	17.422
	12.331	30.103	33.935	25.687	50.065	13.134
	33.546	85.979	22.529	14.278	10.356	50.678
	26.843	102.044	20.68	38.495	9.262	33.861
	29.204	40.404	9.302	73.636	12.313	14.835
	17.138	56.789	46.512	79.07	45.246	76.235
	48.628	10.4	18.06	59.122	21.926	24.337
	42.043	33.513	21.624	86.136	15.113	16.551
	12.708	37.94	8.159	51.003	10.066	27.801
	16.948	36.687	14.708	74.413	6.88	34.158
	9.523	23.798	68.552	21.128	95.363	32.252
	20.297	23.3	14.423	62.242	11.18	72.164
	14.046	21.059	12.705	15.338	10.32	89.664
	156.651	34.685	54.76	13.484	49.388	77.482
	48.89	26.041	112.969	58.359	122.935	60.04
	51.812	28.027	15.587	107.106	30.624	32.855
	51.664	23.088	17.211	45.464	47.032	17.717
	43.484	27.742	73.541	13.713	105.839	23.907
	29.991	10.361	26.469	23.89	75.406	17.079
	11.264	73.263	19.177	20.202	36.81	19.691
	16.075	32.462	53.188	72.047	47.952	17.655
	28.387	45.635	13.155	89.893	9.615	13.44
	24.913	17.738	23.786	12.543	10.776	9.62
	21.624	27.825	84.098	80.408	5.439	20.037
	71.296	26.268	10.638	71.483	10.946	88.662
	30.832	53.333	8.654	43.936	8.854	96.614
	12.005	46.592	11.097	59.017	15.019	52.906
	8.917	44.087	84.512	74.198	17.286	30.164
	17.21	29.712	51.632	113.629	98.904	45.676
	14.533	78.091	96.276	40.146	120.329	110.407
	3.594	17.415	147.049	12.929	85.733	118.406
	12.941	36.791	73.019	11.57	94.745	148.9
	73.753	7.744	11.681	9.806	87.234	232.988
	78.534	14.803	11.184	10.066	131.555	70.124
	40.126	20.953	10.4	12.403	39.98	14.891
	73.249	35.935	17.921	15.956	71.131	8.984
	52.953	20.069	116.927	22.044	59.96	14.321
	156.034	45.023	143.568	11.538	189.889	268.921
	13.021	23.969	127.651	40.429	97.184	14.653
	204.9	30.649	132.434	17.355	42.959	10.034
	71.125	51.633	21.911	17.522	56.296	17.355
	74.793	44.916	69.639	19.611	18.142	149.935
	60.729	33.521	10.466	37.61	41.073	12.229
	111.062	29.921	9.03	26.255	84.306	15.534
	97.036	54.036	26.794	20.801	76.805	107.057
	65.495	43.694	50.163	31.763	42.692	41.773
	68.322	31.848	45.595	9.589	26.702	13.44
	48.345	15.247	90.367	18.243	98.765	11.954
	43.061	12.457	9.235	30.866	60.396	15.223
	40.904	10.503	9.305	17.729	56.208	13.683
	37.371	11.186	5.771	12.313	48.352	39.411
	48.069	15.583	8.41	20.579	18.223	13.162
	72.067	26.944	8.603	28.367	16.698	10.361
	45.635	51.948	66.448	76.763	98.24	49.982
	48.151	83.692	10.779	106.931	34.849	95.364
	74.656	52.648	117.596	12.721	68.735	130.096
	99.148	15.48	7.743	11.283	124.269	160.382
	139.941	17.968	8.603	8.979	77.137	129.351
	36.771	40.793	62.233	17.793	8.979	76.622
	30.054	18.072	100.326	13.297	153.701	89.522
	54.758	35.372	49.058	26.493	86.228	87.781
	55.875	35.528	35.114	14.595	122.983	98.693
	10.965	39.477	13.872	56.764	50.235	81.188
	11.283	62.936	9.502	14.321	13.155	40.877
	45.741	37.571	100.786	8.854	13.297	41.681
	142.441	54.184	43.562	8.643	15.384	18.293
	40.182	22.862	10.033	8.159	21.362	59.026
	81.564	169.453	10.735	10.776	65.951	144.687
	122.082	13.134	6.083	14.595	56.871	8.983
	47.081	6.883	6.641	11.858	11.264	8.984
	53.675	21.716	56.939	12.524	19.23	14.243
	91.465	17.84	43.229	73.431	12.071	10.325
	80.348	14.728	13.602	71.752	13.351	21.58
	162.756	24.23	60.88	45.922	14.62	12.407
	91.331	119.303	47.814	11.134	14.721	33.521
	16.905	12.046	24.963	30.96	71.479	21.363
	59.095	15.291	19.691	17.646	61.392	18.414
	83.904	12.17	134.087	13.867	100.674	55.416
	100.343	17.316	67.014	15.858	18.805	194.919
	30.127	66.677	12.407	34.238	7.929	16.074
	255.12	16.905	10.395	11.57	13.76	14.627
	150.533	34.845	12.227	52.986	8.854	66.119
	99.875	19.865	11.217	35.018	14.313	36.828
	77.317	24.953	15.22	131.768	112.87	82.914
	94.839	28.004	122.034	17.646	50.043	33.861
	51.358	67.202	133.83	20.488	194.139	132.151
	52.317	63.328	59.386	44.396	127.562	62.349
	64.706	99.825	20.01	16.444		35.422
	14.728	48.924	170.735	18.749		24.639
	80.089	39.477	16.368	49.765		59.214
	43.236	29.025	110.107	12.04		42.222
	65.841	78.822	165.321	12.04		78.907
	93.887	90.576	58.525	9.806		14.853
	43.694	49.95	12.407	4.385		29.669
	96.065	58.863	82.274	12.9		36.025
	128.434	46.535	138.696	19.402		72.979
	115.455	36.515	10.359	16.94		81.429
	54.28	104.357	8.41	21.153		27.921
	41.686	71.421	12.916	73.428		34.403
	81.963	96.372	14.851	11.697		39.181
	116.162	18.243	91.876	27.213		25.8
	128.019	45.733	86.606	19.177		119.972
	23.443	19.412	95.612	31.228		39.603
	47.845	10.5	72.962	18.571		10.198
	60.726	16.707	58.677	39.181		10.42
	96.418	24.645	143.213	68.114		18.949
	172.121	30.157	121.167	36.739		11.484
	92.423	29.417	77.079	60.482		37.527
	208.447	19.865	21.892	34.349		47.104
	32.877	30.212	13.127	47.191		6.937
	195.167	31.403	44.053	42.802		47.999
	128.761	17.463	45.132	26.001		35.403
	31.493	22.437	8.514	39.466		62.084
	27.49	16.52	7.847	14.146		61.36
	59.256	42.866	29.253	5.231		25.418
	52.002	21.665	6.55	10.32		15.002
	91.683	140.1	18.97	99.625		39.603
	235.08	40.174	16.317	49.253		24.237
	142.722	21.937	10.356	48.687		20.821
	17.399	13.794	26.136	28.336		25.687
	120.837	70.728	74.943	45.754		25.047
	69.961	108.326	117.225	28.27		34.452
	113.108	120.574	34.53	30.588		31.509
	97.192	150.026	73.705	89.976		99.312
	74.887	145.518	25.814	21.275		14.803
	43.114	15.058	13.351	14.236		20.397
	45.727	24.696	24.461	87.893		24.28
	108.898	17.077	60.255	73.226		43.249
	68.507	42.601	57.809	124.7		57.1
	215.767	36.021	129.169	9.262		63.445
	40.977	13.019	157.032	54.235		12.077
	112.702	28.497	107.503	13.234		13.924
	9.302	47.247	99.496	38.2		75.685
	13.104	38.098	47.049	49.924		54.291
	54.261	74.803	149.85	107.9		40.696
	29.712	127.597	93.059	46.312		13.385
	32.328	99.158	69.495	55.468		10.361
	85.449	33.805	16.317	58.707		21.939
	155.643	6.263	19.037	6.717		10.034
	71.758	5.016	64.872	10.066		20.252
	73.092	10.466	37.94	31.622		56.586
	36.753	57.744	88.082	42.698		77.628
	136.487	137.701	91.508	118.506		69.349
	79.001	197.332	82.205	30.296		77.52
	112.949	19.862	57.311	15.811		12.32
	86.277	75.414	90.181	47.617		17.463
	20.088	87.723	51.212	60.798		16.618
	47.161	76.103	12.522	80.883		9.735
	65.858	59.988	54.241	11.484		61.098
	126.864	24.636	73.883	69.196		47.441
	14.278	24.721	83.247	27.005		58.978
	29.204	37.825	87.989	14.321		12.916
	59.468	58.805	65.597	33.947		136.397
	102.273	57.429	57.524	36.034		10.071
	63.223	54.029	12.9	51.779		158.341
	86.848	13.356	90.892	11.18		176.011
	118.889	8.773	88.659	49.5		105.641
	39.631	45.302	42.399	96.089		7.095
	31.281	91.477	10.096	58.921
	30.123	55.921	62.015	50.414
	33.597	12.323	16.77	28.855
	44.547	28.907	15.239	12.964
	20.088	13.356	11.841	57.419
	10.638	11.217	9.615	46.188
	79.615	6.936	25.8	20.084
	23.292	15.93	6.88	25.809
	44.346	35.044	7.124	20.719
	64.793	35.475	7.929	32.703
	53.453	68.242	71.587	10.033
	20.791	109.798	132.457	25.008
	138.895	22.908	96.921	56.025
	115.935	8.517	12.721	17.964
	82.608	8.116	15.291	25.477
	62.522	15.049	44.271	76.494
	64.655	11.217	9.122	25.302
	87.824	18.175	136.959	50.933
	109.111	27.584	9.142	65.134
	120.941	12.905	9.142	14.552
		14.005	94.224	15.485
		18.612	80.179	15.507
		8.517	6.081	41.375
		13.667	8.643	15.058
		60.834	68.848	16.33
		18.868	42.49	23.363
		51.173	90.576	24.51
		63.371	155.871	9.463
		21.091	12.698	12.9
		56.178	11.57	9.463
		74.575	10.356	31.552
		26.711	137.482	24.629
		39.787	100.723	16.526
		127.745	46.448	30.779
		17.84	15.058	57.794
		20.719	14.796	44.374
		65.708	26.113	23.371
		73.646	26.113	53.005
		5.2	10.579	15.509
		9.306	14.146	12.238
		83.349	12.162	9.145
		22.631	36.487	10.324
		75.124	14.708	11.184
		59.76	76.285	8.159
		50.824	75.313	10.5
		148.479	12.672	15.587
		46.948	36.1	10.395
		20.249	20.077	40.02
		39.297	73.483	33.475
		141.79	111.671	4.633
		13.104	52.937	15.044
		56.026	45.385	13.872
		39.237	24.004	68.991
		63.437	71.006	39.682
		47.38	103.493	43.794
		54.37	59.892	74.305
		112.073	53.516	56.322
		125.264	33.463	18.611
		57.802	97.328	16.021
		32.328	54.49	27.65
		69.649	139.585	48.826
		117.801		44.744
		13.104		41.022
		11.217		55.713
		12.318		34.637
		65.044		43.528
		82.877		43.024
		42.103		57.012
		110.04		70.965
		10.946		12.9
		111.926		48.208
		56.716		13.789
		8.961		34.423
		8.982		45.265
		8.961		51.6
		7.743		83.874
		13.872		42.19
		13.924		33.508
		15.93		57.098
		53.675		30.866
		106.085		14.241
		59.667		10.395
		13.765		10.466
		20.084		15.245
		91.829		9.145
		138.021		10.466
		126.992		13.297
		9.266		42.234
		10.984		15.099
		257.452		13.155
		56.026		8.473
		40.655		188.899
		36.753		43.884
		60.882		36.174
		47.991		12.167
		49.903		52.594
		0		10.395
		12.526		10.965
		43.614		16.733
		56.814		20.366
		23.997		54.308
		31.631		54.886
		9.809		60.376
		84.876		27
		52.592		88.891
		181.546		30.226
		48.94		59.709
		104.113		36.682
		165.132		146.456
		79.154		15.863
		32.558		147.345
		89.676		31.473
		14.495		16.164
		70.567		8.385
		118.343		8.736
		83.522		109.098
		19.744		8.082
		115.61		9.235
		69.412		7.351
		46.877		10.715
		12.255		10.809
		11.217		11.622
		11.316		10.032
		11.983		9.04
		41.528		13.149
		29.139		11.622
		36.297		147.609
		26.684		53.596
		77.796		93.577
		42.235		12.327
		77.583		11.622
		26.725		10.395
		105.511		188.964
		150.986		15.872
		50.808		12.545
		14.005		21.089
		10.324		21.682
		37.893		184.196
		67.442		22.356
		85.763		15.593
		8.773		9.584
		7.351		18.632
		76.568		12.572
		88.609		45.669
		25.089		37.137
		127.019		11.264
		102.737		8.259
		189.776		55.909
		61.676		32.345
		62.618		33.785
		46.933		12.217
		72.521		8.218
		155.103		32.392
		20.246		30.419
		170.595		35.425
		9.824		27.133
		12.073		41.1
		34.792		16.641
		134.07		10.4
		212.006		8.381
		171.229		15.808
		35.21		18.099
		7.931		47.01
		64.77		77.349
		118.534		23.361
		45.978		17.337
		67.946		40.662
		78.973		133.39
		57.582		32.873
		78.05		25.675
		47.963		56.083
		76.904		54.122
		102.936		20.397
		137.802		55.732
		97.387		18.248
		73.62		17.588
		111.877		37.427
		44.58		63.633
		41.726		60.28
		65.397		38.31
		47.435		90.536
		41.334		54.415
		21.059		52.784
		20.446		51.625
		43.861		79.007
		82.115		42.202
		81.008		72.865
		45.69		106.816
		25.005		19.792
		19.691		46.49
		49.665		67.7
		90.53		7.442
		59.2		44.257
		74.242		15.593
		139.988		66.258
		106.653		20.414
		75.112		67.795
		132.578		14.495
		11.7		21.93
		17.544		6.626
		54.362		9.619
		55.203		8.736
		15.812		5.548
		13.158		13.252
		58.896		14.701
		23.22		53.577
		28.71		87.663
		15.099		38.661
		89.468		31.616
		89.078		16.62
		66.407		9.589
		52.436		23.011
		110.298		50.138
		108.759		25.229
		98.065		12.17
		67.802		12.225
		55.203		23.681
		13.87		15.701
		68.492		107.973
		60.66		88.38
		45.655		76.306
		107.159		41.881
		95.708		39.491
		96.651		37.22
		157.792		39.533
		184.178		127.606
		62.136		33.785
		10.034		98.364
		17.355		30.588
		13.13		53.208
		57.173		82.249
		29.374		9.589
		26.162		10.4
		90.324		8.136
		70.874		5.262
		58.846		7.095
		54.021		9.584
		102.452		330.246
		81.793		53.539
		95.36		109.473
		92.172		57.691
		29.225		63.685
		68.82		75.702
		13.897		80.895
		7.767		76.182
		12.165		34.914
		27.128		61.872
		29.733		177.586
		13.849		100.428
		12.165		53.425
		14.648		85.046
		43.865		93.685
		27.005		45.208
		14.205		50.721
		36.674		85.569
		33.297		245.968
		18.529		14.891
		15.534		13.995
		39.17		12.437
		32.635		9.584
		98.169		15.353
		6.718		13.252
		95.288		14.423
		74.4		23.655
		65.907		24.338
		8.772		29.079
		10.638		38.974
		44.738		12.785
		21.672		21.572
		115.975		104.376
		53.818		102.847
		19.5		94.867
		21.556		142.022
		90.422		166.042
		69.854		102.254
		62.992		7.396
		91.03		12.407
		54.425		49.126
		67.13		12.994
		53.845		104.763
		6.55		14.816
		43.86		17.337
		66.975		11.134
		125.916		21.059
		118.459		9.03
		77.079		12.255
		103.518		8.218
		43.484		13.149
		33.453		138.307
		5.231		22.849
		13.155		48.683
		17.138		70.601
		24.28		65.813
		26.311		52.44
		126.408		27.356
		155.337		14.849
		112.742		24.627
		58.537		85.13
		43.462		23.96
		127.897		20.546
		10.5		36.504
		6.734		64.737
		12.118		40.803
		82.529		100.791
		14.416		113.311
		22.77		109.229
		15.575		84.485
		113.936		111.914
		29.291		6.385
		52.784		10.684
		49.709		45.342
		40.135		8.094
		16.698		37.041
		11.697		58.443
		11.097		63.03
		9.142		43.388
		11.213		34.403
		12.403		25.477
		9.302		61.684
		15.534		39.703
		15.694		22.877
		11.77		90.573
		15.707		10.984
		17.367		8.736
		8.77		12.255
		10.4		15.287
		33.085		12.323
		87.978		20.063
		163.205		153.119
		180.978		72.519
		101.64		82.4
		75.685		45.686
		64.506		61.747
		40.857		44.181
		47.767		49.035
		48.769		47.472
		51.95		91.489
		8.159		65.746
		12.313		34.605
		53.208		21.509
		41.512		13.667
		111.472		14.321
		40.052		70.754
		22.574		14.552
		17.463		35.522
		48.353		83.664
		19.047		88.97
		39.765		7.396
		41.641		10.965
		64.822		18.357
		8.654		18.243
		7.398		35.3
		10.638		15.701
		36.588		7.767
		14.087		14.552
		92.777		18.248
		8.159		20.161
		47.705		80.325
		15.215		47.56
		25.293		171.077
		41.512		57.057
		12.323		78.78
		29.442		78.534
		52.503		83.927
		66.438		51.285
		51.521		104.261
		207.303		77.557
		134.211		103.954
		22.877		140.984
		32.236		11.767
		19.744		9.584
		43.027		14.884
		21.93		15.181
		92.018		11.484
		22.36		9.523
		108.052		20.013
		166.263		51.737
				21.065
				50.098
				27.942
				47.617
				30.218
				121.933
				12.323
				94.012
				96.037
				141.683
				46.904
				12.043
				17.427
				60.66
				62.847
				11.182
				141.826
				33.646
				16.613
				81.293
				83.946
				24.812
				150.857
				11.215
				17.712
				15.861
				13.13
				25.8
				159.235
				91.216
				10.358
				10.068
				63.946
				29.448
				102.015
				195.275
				146.011
				49.891
				23.452
				54.137
				93.043
				78.621
				89.798
				81.718
				73.62
				140.06
				88.916
				25.687
				107.404
				40.493
				61.676
				40.061
				38.661
				6.718
				29.712
				42.175
				19.952
				71.602
				87.513
				96.927
				12.931
				9.03
				9.808
				12.903
				7.55
				11.182
				7.742
				12.043
				27.705
				29.297
				128.859
				81.953
				19.099
				82.407
				40.784
				119.199
				100.998
				160.691
				112.3
				12.316
				12.073
				17.311
				16.524
				22.199
				52.16
				89.327
				136.155
				42.707
				69.042
				51.523
				43.224
				26.331
				13.87
				11.411
				19.502
				16.23
				12.39
				25.005
				18.469
				10.5
				25.575
				11.7
				10.198
				13.155
				18.865
				11.538
				20.716
				48.902
				37.789
				23.256
				64.002
				11.981
				9.761
				12.316
				13.354
				20.805
				51.809
				57.506
				51.754
				12.524
				16.613
				18.447
				76.244
				52.756
				34.072
				38.927
				56.897
				160.53
				42.897
				88.426
				95.799
				122.299
				15.48
				123.351
				63.361
				37.125
				79.565
				32.023
				11.841
				85.454
				55.059
				34.349
				87.65
				7.685
				13.953
				14.41
				80.705
				95.799
				9.89
				14.41
				6.977
				12.037
				9.606
				8.646
				13.585
				11.283
				21.285
				27.323
				27.925
				33.677
				20.265
				15.756
				33.512
				12.407
				85.54
				42.529
				75.861
				20.771
				70.232
				80.842
				36.968
				60.329
				70.86
				45.638
				154.576
				64.442
				75.69
				155.65
				70.644
				11.528
				9.606
				11.538
				10.567
				46.27
				61.549
				45.017
				65.496
				23.236
				60.685
				106.806
				68.287
				85.396
				8.159
				16.733
				74.284
				62.015
				20.64
				87.13
				19.23
				86.21
				92.697
				6.934
				10.32
				35.604
				45.246
				51.327
				27.121
				10.812
				11.61
				12.04
				10.32
				20.058
				40.502
				16.158
				21.926
				43.249
				74.005
				77.247
				22.194
				20.297
				137.323
				136.833
				84.652
				59.409
				133.82
	8.86197e-21	1.15261e-13	4.11966e-42	3.72123e-12	2.92234e-17			2.77214e-09	4.54721e-15	3.5541e-22	7.30434e-27
	shSCR	shMACF1.1	shMACF1.2	shMACF1.3	shMACF1.4	shMACF1.mix		siSCR	siMACF1.1	siMACF1.2	siMACF1.3	siMACF1.mix
	60.249	45.155	47.814	36.2785	42.988	42.16	Median	77.3465	47.265	49.998	46.293	42.509
	60.4361	42.6465	43.5591	40.6654	47.5587	45.0183	SD	68.3054	51.9921	54.8414	48.5181	47.3859
	1.8651	1.13653	1.31876	1.00662	1.53575	1.40958	SEM	3.19519	2.14412	2.13957	1.94854	1.9313
