# Supplementary material for: MACF1 controls skeletal muscle function through the microtubule-dependent localization of extra-synaptic myonuclei and mitochondria biogenesis
Source: eLife. 2021 Aug 27;10:e70490. doi: 10.7554/eLife.70490 (PMC8500715; doi:10.7554/eLife.70490)
Supplement: Figure 1—source data 1. [file elife-70490-fig1-data1.xlsx]

## Sheet: 1F
sarcomeric length	shSCR			shMACF1.mix
each experimental set is code colored	1.583	1.698	1.781	1.387	2.1	1.698
	1.342	1.368	2.009	1.698	1.688	1.688
	1.46	1.734	2.836	1.516	1.781	2.519
	1.781	1.471	2.265	1.516	1.875	2.372
	1.387	1.471	1.839	1.45	1.46	2.407
	1.04	1.875	1.688	1.593	1.597	2.784
	1.485	1.97	1.688	1.875	1.46	2.695
	1.025	1.825	1.682	1.471	1.361	2.746
	1.099	1.648	2.144	1.784	1.784	2.646
	0.968	1.916	1.98	1.372	1.906	2.144
	1.421	1.781	1.648	1.847	1.46	1.925
	1.14	1.872	2.009	1.881	1.648	2.169
	1.342	1.557	2.1	1.881	1.29	2.746
	1.14	1.688	2.467	1.46	1.387	2.418
	1.173	1.471	1.597	1.544	1.557	1.916
	1.531	1.698	1.593	1.583	1.506	1.781
	1.228	1.755	1.593	1.224	1.755	3.149
	1.228	2.012	2.169	1.53	2.04	2.974
	1.326	1.688	2.019	1.224	1.66	2.425
	1.212	1.688	2.39	1.734	1.66	2.452
	1.081	1.557	1.881	1.847	1.682	2.558
	1.163	1.98	1.881	1.442	1.554	2.648
	1.324	2.164	1.881	1.635	1.682	2.903
	1.129	1.847	2.237	1.432	1.516	3.259
	1.025	2.004	1.442	1.941	1.98	2.33
	1.241	1.241	1.66	1.122	1.645	2.009
	1.051	2.103	1.731	1.432	2.063	2.974
	1.127	1.839	1.66	1.428	1.861	2.13
	0.953	1.734	1.648	1.53	1.781	2.467
	1.262	1.66	1.368	1.428	1.816	2.519
	1.242	1.533	1.962	1.938	1.442	1.46
	1.241	1.432	2.746	1.737	1.45	1.635
	1.29	1.734	2.053	1.33	1.816	2.13
	1.212	1.737	2.281	1.428	1.66	1.861
	1.324	2.043	2.053	1.228	1.805	1.682
	1.432	1.761	1.46	1.372	2.152	1.807
	1.442	1.839	1.755	1.163	1.731	1.66
	1.432	1.66	1.597	1.45	1.949	1.906
	1.361	1.66	2.053	1.387	1.163	2.379
	1.46	1.361	1.825	1.306	1.805	2.265
	1.228	1.746	2.328	1.33	1.731	2.858
	1.04	2.063	1.645	1.816	2.164	2.379
	1.14	1.847	1.755	1.33	1.959	2.784
	1.122	1.66	1.839	1.099	1.306	2.281
	1.14	2.08	1.839	1.103	1.755	2.281
	1.025	1.781	1.897	1.387	1.516	1.613
	1.228	1.682	1.593	1.372	1.875	2.207
	1.342	1.645	1.737	1.755	1.516	1.734
	0.94	1.97	1.66	1.442	1.949	2.04
	1.342	1.839	1.66	1.228	2.025	2.834
	1.224	1.29	1.839	1.417	1.66	1.925
	1.428	1.326	2.103	1.306	1.66	2.152
	1.122	1.387	1.33	1.245	1.45	1.881
	1.432	1.46	1.784	1.306	1.381	1.53
	1.326	1.781	2.326	1.163	1.584	1.698
	1.428	2.425	1.734	1.02	1.191	2.917
	1.533	2.032	1.698	1.02	1.551	2.407
	1.228	2.214	2.093	1.897	1.436	1.872
	2.04	1.856	1.45	1.417	1.582	2.407
	1.632	1.969	1.959	1.326	1.33	2.379
	2.043	1.753	1.673	1.194	1.683	2.13
	1.632	2.012	1.442	1.421	1.276	2.482
	1.262	1.753	1.593	1.326	1.381	2.326
	1.194	1.442	1.163	1.05	1.582	2.326
	1.099	1.163	1.897	1.099	1.122	2.614
	1.194	1.949	1.593	1.245	1.734	2.425
	1.241	1.875	2.103	1.084	1.836	1.97
	1.648	2.093	1.673	1.372	1.53	2.519
	1.262	2.237	2.381	1.387	1.428	2.237
	1.132	1.45	2.093	1.554	1.428	2.228
	1.123	1.19	2.237	1.485	1.836	2.103
	1.127	1.387	2.093	1.417	2.04	1.839
	0.981	1.66	2.019	1.326	1.33	2.677
	1.14	1.516	2.04	1.368	1.533	3.242
	1.132	1.875	1.53	1.19	1.836	1.97
	1.392	1.516	2.346	1.14	1.839	2.71
	1.065	1.417	1.645	1.099	2.348	2.161
	1.355	1.597	2.448	1.471	1.734	2.652
	1.262	1.417	1.632	1.516	1.53	2.484
	1.194	1.66	1.734	1.743	1.734	2.152
	1.163	1.805	2.043	1.516	1.746	2.292
	1.387	1.554	1.734	1.14	1.635	2.207
	1.71	1.737	1.428	1.46	1.53	2.292
	1.387	1.839	1.737	1.557	1.632	2.065
	1.743	1.698	1.734	1.278	1.485	2.66
	1.326	1.925	1.428	1.103	1.941	1.698
	1.326	1.53	1.941	1.368	2.181	1.737
	1.232	1.471	1.949	1.228	1.46	1.737
	1.232	1.673	1.432	1.19	1.361	1.737
	1.05	2.025	2.244	1.14	1.544	1.836
	1.19	1.755	2.346	1.368	1.847	2.142
	1.245	1.368	2.04	1.278	1.847	1.632
	1.784	1.417	1.635	1.597	1.29	1.632
	1.423	1.597	2.04	1.326	1.71	1.836
	1.09	1.228	2.244	1.554	1.743	1.428
	1.2	1.194	2.754	1.506	1.734	2.043
	1.342	1.554	2.04	1.784	1.583	2.04
	1.436	1.825	1.839	1.471	1.98	1.737
	1.732	1.698	2.142	1.099	1.583	1.428
	1.485	2.012	1.53	1.232	1.56	1.442
	1.016	2.19	1.938	1.417	1.387	1.839
	1.26	2.207	1.53	1.734	1.98	1.847
	1.326	1.19	1.836	1.471	2.144	2.456
	0.968	2.239	1.743	1.557	2.6	2.197
	0.919	1.816	1.421	1.14	2.065	2.523
	1.163	1.688	2.053	1.557	1.342	3.107
	1.122	2.202	1.554	1.53	1.839	2.921
	1.262	1.906	1.881	1.597	2.425	1.925
	1.544	2.13	1.361	1.516	1.417	1.648
	1.163	1.682	2.228	1.839	1.597	1.97
	1.544	1.875	2.292	1.645	1.673	2.012
	1.66	2.265	2.103	1.417	1.587	2.19
	1.04	2.558	2.197	1.46	1.587	1.872
	1.232	1.613	1.781	1.262	1.593	1.875
	1.485	2.228	2.388	1.361	2.33	2.065
	1.417	1.516	2.08	1.485	1.45	1.962
	1.232	1.635	1.743	1.226	1.816	2.239
	1.19	1.645	2.281	1.46	2.025	2.012
	1.682	2.063	2.13	1.275	2.49	1.781
	1.71	2.722	2.509	1.485	1.98	2.372
	1.682	2.181	1.875	1.516	1.925	2.281
	1.781	2.381	2.33	1.46	2.292	1.935
	1.33	1.66	2.103	1.861	1.98	2.1
	1.781	1.224	1.781	1.163	2.065	1.875
	0.94	1.962	1.897	1.583	2.326	2.161
	1.127	1.645	1.66	1.46	1.613	2.484
	1.485	2.281	1.593	1.361	1.805	2.388
	1.639	1.938	1.372	1.583	1.881	2.181
	1.737	1.533	1.45	1.471	1.291	1.734
	1.378	1.737	1.949	1.516	1.652	2.04
	1.581	1.949	1.673	1.163	1.695	2.144
	1.734	1.962	1.673	1.33	1.423	2.55
	1.429	1.682	1.959	1.33	1.53	1.938
	1.177	1.554	2.326	1.19	1.533	2.04
	1.326	1.743	1.597	1.959	1.284	2.142
	1.326	2.13	1.597	1.442	1.284	1.635
	1.005	1.485	1.781	1.387	1.411	1.737
	1.516	1.807	2.265	1.471	1.451	2.652
	1.232	2.181	2.239	1.839	1.781	2.144
	1.516	1.682	1.593	0.962	1.387	2.355
	1.583	2.228	2.632	1.387	1.648	2.142
	1.485	2.228	2.433	1.306	1.506	1.737
	1.485	1.935	1.949	1.593	1.648
	1.645	2.425	2.032	1.306	1.33
	1.421	2.161	1.71	1.613	1.46
	1.613	2.484	2.08	1.387	1.485
	1.163	2.258	1.906	1.557	1.97
	1.71	2.558	1.98	1.646	1.645
	1.163	2.746	2.065	1.29	1.421
	1.682	2.58	2.379	1.346	1.645
	1.906	2.161	2.103	1.421	1.29
	1.807	2.746	1.825	1.451	1.648
	1.682	2.484	2.465	1.194	1.734
	1.262	2.872	2.693	1.44	2.33
	1.361	2.004	2.372	1.597	1.471
	1.66	2.161	2.197	1.3	1.648
	1.645	2.388	1.935	0.968	1.71
	1.784	2.55	2.97	1.307	1.554
	1.387	1.755	2.519	1.403	1.554
	1.66	1.881	2.388	2.043	1.516
	1.417	1.387	2.821	1.33	1.421
	1.645	1.737	2.501	1.14	2.004
	1.784	1.698	1.97	1.228	1.71
	1.875	1.645	2.71	1.737	1.682
	2.04	2.04	3.226	1.533	2.009
	1.287	1.98	2.13	1.847	2.065
	1.673	2.418	2.501	1.241	1.554
	1.306	1.698	2.301	1.544	1.46
	1.554	1.962	2.582	1.635	2.19
	1.267	2.19	2.326	1.938	2.13
	1.339	1.557	2.258	1.938	1.648
	1.033	1.825	1.554	1.71
	1.673	2.103	2.6	2.032
	1.429	1.872	2.1	1.544
	1.076	1.485	2.834	1.807
	0.919	1.583	2.695	1.516
	1.225	1.417	2.519	1.673
	0.969	1.613	2.012	1.298
	0.99	1.784	2.1	1.731
	1.114	1.645	2.372	1.387
	1.613	1.648	2.654	1.731
	1.417	1.597	2.043	1.53
	1.597	1.872	2.092	1.66
	1.361	1.962	2.091	1.816
	2.063	2.161	1.938	1.881
	2.063	2.032	1.888	1.53
	1.645	2.207	1.938	1.737
	1.554	1.825	2.143	1.645
	1.781	1.906	1.737	1.471
	1.56	1.935	1.837	1.506
	1.916	2.202	2.04	1.925
	1.597	2.032	2.193	1.103
	1.154	2.452	2.605	1.298
	1.372	2.032	1.904	1.163
	1.306	2.388	2.05	2.13
	1.29	1.688	2.164	1.516
	1.906	2.326	1.761	2.065
	1.781	1.847	1.741	2.032
	1.29	1.632		2.065
	1.442	1.432		2.053
	0.968	1.949		1.688
	1.583	1.839		1.597
	1.262	2.181		1.781
	1.361	1.962		1.278
	1.14	1.839		1.506
	1.645	1.949		1.71
	1.262	2.265		1.278
	1.342	1.941		1.781
	1.442	2.381		1.33
	1.099	2.253		1.825
	1.194	2.683		1.326
	1.262	2.152		1.875
	1.326	1.761		1.688
	1.29	1.962		1.781
	1.387	2.103		1.962
	1.326	2.08		1.14
	1.682	2.301		1.14
	1.194	1.684		1.14
	0.918	2.092		1.278
	1.53	1.581		1.554
	1.224	2.046		1.597
	1.734	1.737		1.648
	1.632	1.786		1.485
	1.326	1.992		1.554
	1.53	1.684		1.506
	1.224	1.581		1.554
	1.224	1.432		1.66
	1.103	1.635		1.46
	1.645	1.686		1.262
	2.39	1.531		1.56
	1.557	1.173		1.241
	1.372	1.737		1.533
	1.593	1.432		1.224
		2.043		1.554
		1.442		1.839
		1.361		1.743
		1.53		1.872
		1.432		1.825
		2.144		2.043
		1.224		1.326
		1.33		1.632
		1.635		1.746
		1.428		1.224
		1.632		1.781
		1.33		1.682
		1.432		1.46
		1.632		1.557
		1.428		1.485
		1.53		1.065
		1.66		1.262
		1.099		1.485
		1.583		1.099
		1.648		1.71
		1.557		2.103
		1.387		1.361
		1.29		1.648
		1.29		1.387
		1.781		1.645
		2.49		1.228
		2.183		1.361
		1.593		1.361
		2.379		1.56
		1.881		1.342
		1.587		1.262
		1.959		1.583
		1.731		1.442
		1.593		1.025
		2.237		1.881
		1.587		1.743
				1.761
				1.387
				1.72
				1.544
				1.72
				1.597
				2.04
				1.938
				2.246
				1.432
				2.043
				1.428
				1.734
				1.46
				1.645
				1.861
				2.004
				1.387
				1.66
				1.98
				1.645
				1.645
				1.949
				1.949
				1.53
				1.442
				1.306
				1.731
				2.452
				1.98
				1.593
				1.875
				1.805
				1.97
				1.688

## Sheet: 1H
microtubules intensity around myonuclei	shSCR	shMACF1.mix
pooled data obtained from 3 individual experiments per condition	27.62	29.521
	33.606	16.672
	28.04	20.46
	76.182	24.339
	73.207	24.378
	55.028	27.122
	61.486	43.843
	54.95	42.001
	103.902	14.704
	57.901	17.513
	77.567	16.436
	72.021	17.983
	105.046	22.466
	102.789	15.174
	25.108	14.426
	111.524	26.547
	35.459	20.543
	28.373	12.667
	33.173	26.017
	52.152	33.678
	37.94	18.807
	50.916	15.971
	65.848	25.233
	59.622	33.512
	27.918	27.789
	61.566	18.478
	53.149	23.138
	30.775	23.309
	30.926	19.667
	66.915	29.395
	24.752	33.503
	49.077	36.926
	49.947	29.46
	69.281	51.984
	55.095	49.965
	54.345	27.109
	44.468	24.489
	45.804	34.475
	46.527	29.375
	34.629	19.926
	49.611	28.79
	62.696	25.498
	31.833	30.162
	53.651	25.72
	87.812	22.815
	41.67	45.881
	77.415	33.171
	22.7	28.791
	56.128	21.623
	55.633	27.958
	54.442	33.059
	50.178	44.266
	17.318	90.716*
	24.827	44.322
	31.845	25.309
	40.855	39.459
	21.366	29.664
	23.097	12.231
	16.616	45.245
	35.278	41.673
	24.151	34.844
		11.558
		13.672
		28.482
		40.017
		25.028

## Sheet: 1I
myonuclei feret	shSCR	shMACF1,mix
pooled data obtained from 3 individual experiments per condition	24.777	6.76
	19.436	6.781
	18.849	7.143
	18.702	7.414
	18.078	7.573
	17.805	7.725
	17.748	7.755
	17.526	7.768
	17.34	7.946
	16.966	7.946
	16.769	7.956
	16.739	8.16
	16.382	8.324
	16.321	8.334
	16.306	8.371
	16.248	8.386
	16.182	8.386
	16.064	8.446
	16.003	8.463
	16.001	8.496
	15.933	8.522
	15.871	8.522
	15.835	8.57
	15.765	8.57
	15.708	8.578
	15.496	8.609
	15.496	8.66
	15.489	8.789
	15.358	8.829
	15.322	8.887
	15.184	8.911
	15.163	8.978
	15.102	9.013
	15.003	9.031
	14.976	9.036
	14.893	9.098
	14.875	9.144
	14.837	9.2
	14.815	9.232
	14.804	9.243
	14.802	9.304
	14.736	9.304
	14.711	9.342
	14.701	9.35
	14.626	9.36
	14.604	9.463
	14.588	9.538
	14.524	9.555
	14.518	9.59
	14.497	9.623
	14.488	9.623
	14.488	9.666
	14.449	9.672
	14.419	9.726
	14.299	9.769
	14.28	9.777
	14.28	9.796
	14.251	9.809
	14.235	9.809
	14.17	9.845
	14.163	9.935
	14.148	9.935
	14.148	9.95
	14.145	9.963
	14.129	9.998
	14.117	10.004
	14.089	10.004
	14.089	10.004
	14.021	10.004
	14.021	10.029
	14.011	10.035
	13.999	10.038
	13.994	10.093
	13.969	10.102
	13.968	10.163
	13.963	10.2
	13.963	10.224
	13.903	10.243
	13.896	10.291
	13.875	10.297
	13.863	10.299
	13.86	10.324
	13.815	10.349
	13.791	10.402
	13.753	10.412
	13.741	10.42
	13.638	10.426
	13.619	10.45
	13.618	10.454
	13.608	10.531
	13.608	10.539
	13.608	10.539
	13.563	10.608
	13.54	10.649
	13.509	10.649
	13.503	10.657
	13.49	10.68
	13.458	10.688
	13.453	10.688
	13.435	10.696
	13.435	10.708
	13.424	10.71
	13.422	10.737
	13.387	10.75
	13.366	10.75
	13.299	10.754
	13.284	10.779
	13.26	10.789
	13.26	10.827
	13.26	10.843
	13.26	10.858
	13.236	10.86
	13.236	10.881
	13.236	10.902
	13.115	10.934
	13.07	10.957
	13.062	10.978
	13.034	10.986
	13.034	11.024
	13.019	11.024
	13.013	11.033
	12.994	11.041
	12.994	11.041
	12.981	11.057
	12.96	11.131
	12.955	11.175
	12.904	11.175
	12.902	11.183
	12.892	11.22
	12.865	11.251
	12.805	11.252
	12.781	11.266
	12.753	11.331
	12.746	11.331
	12.728	11.375
	12.723	11.38
	12.709	11.404
	12.702	11.44
	12.697	11.469
	12.694	11.469
	12.684	11.516
	12.645	11.549
	12.602	11.556
	12.59	11.578
	12.584	11.612
	12.584	11.626
	12.579	11.626
	12.551	11.63
	12.539	11.63
	12.526	11.63
	12.516	11.63
	12.511	11.657
	12.511	11.678
	12.482	11.706
	12.482	11.706
	12.451	11.756
	12.444	11.756
	12.444	11.772
	12.409	11.786
	12.392	11.806
	12.37	11.82
	12.363	11.827
	12.363	11.828
	12.335	11.828
	12.267	11.834
	12.247	11.845
	12.247	11.869
	12.24	11.883
	12.221	11.883
	12.221	11.895
	12.167	11.939
	12.139	11.948
	12.139	11.954
	12.134	12.036
	12.131	12.038
	12.084	12.038
	12.077	12.083
	12.077	12.11
	12.064	12.12
	12.055	12.126
	12.015	12.242
	12	12.255
	11.939	12.283
	11.895	12.284
	11.834	12.325
	11.827	12.409
	11.772	12.429
	11.742	12.436
	11.715	12.444
	11.706	12.459
	11.69	12.471
	11.678	12.569
	11.599	12.569
	11.598	12.579
	11.578	12.59
	11.513	12.617
	11.44	12.629
	11.44	12.668
	11.426	12.722
	11.424	12.737
	11.419	12.781
	11.38	12.805
	11.366	12.846
	11.344	12.955
	11.331	12.96
	11.285	12.966
	11.266	13.046
	11.264	13.046
	11.251	13.072
	11.25	13.113
	11.222	13.113
	11.175	13.158
	11.16	13.17
	11.024	13.424
	11.003	13.436
	11.003	13.509
	10.948	13.559
	10.913	13.581
	10.904	13.608
	10.866	13.67
	10.864	13.692
	10.864	13.872
	10.814	13.878
	10.772	13.891
	10.737	13.935
	10.71	14.303
	10.69	14.57
	10.688	14.745
	10.657	14.745
	10.61	14.851
	10.602	14.858
	10.586	14.963
	10.581	15.236
	10.492	15.292
	10.468	15.464
	10.422	15.603
	10.412	15.666
	10.324	15.666
	10.31	16.261
	10.196	16.331
	10.163	16.447
	10.147	16.976
	10.077	17.46
	10.077	18.194
	10.064
	10.046
	10.046
	10.035
	10.004
	10.004
	10.004
	10.004
	10.002
	9.965
	9.877
	9.868
	9.845
	9.794
	9.642
	9.59
	9.59
	9.59
	9.525
	9.466
	9.463
	9.413
	9.393
	9.2
	9.169
	8.978
	8.66
	8.541
	8.49
	8.324
	8.284
	7.98
	7.959
	6.927
	shSCR	shMACF1,mix
	12.6955	11.041
	2.24279	2.01461
	0.134272	0.128709

## Sheet: 1J
distance between adjacent myonuclei	shSCR	shMACF1.mix
pooled data obtained from 3 individual experiments per condition	232.667	38.208
	18.232	62.315
	54.92	70.184
	13.901	45.408
	131.559	126.054
	43.305	141.365
	182.14	98.455
	132.808	15.044
	198.557	6.264
	26.562	4.327
	272.28	9.167
	107.692	192.742
	287.228	17.422
	220.573	17.84
	185.994	49.058
	11.186	55.312
	14.853	169.453
	131.243	122.682
	140.725	133.976
	75.703	76.191
	78.883	54.555
	91.29	44.556
	64.503	33.203
	35.145	115.686
	28.737	171.1
	55.128	57.147
	81.976	67.157
	119.578	51.02
	28.387	51.748
	33.247	61.142
	58.695	67.482
	164.358	11.858
	135.46	26.453
	110.876	30.115
	284.485	41.985
	143.988	149.302
	172.093	120.856
	13.468	144.906
	20.668	208.29
	49.376	36.505
	109.203	42.418
	173.024	27.554
	47.612	142.614
	225.927	67.014
	132.641	76.372
	56.821	95.756
	101.123	14.708
	13.106	48.952
	151.464	157.657
	103.401	26.256
	8.385	62.498
	154.156	103.612
	148.855	67.778
	199.179	137.374
	260.279	69.472
	107.223	70.561
	104.846	45.645
	99.808	21.251
	118.605	25.089
	216.215	24.476
	387.376	69.801
	218.33	15.865
	352.916	14.627
	210.058	9.589
	173.503	21
	150.527	18.253
	165.736	17.144
	103.098	43.732
	84.747	79.724
	119.109	6.45
	141.708	10.198
	57.056	35.092
	99.658	55.349
	88.323	137.736
	11.954	31.273
	192.91	39.617
	63.24	95.22
	133.602	71.339
	176.576	60.849
	37.869	117.927
	22.649	63.023
	15.512	175.228
	131.259	71.747
	91.256	128.93
	122.617	178.934
	317.043	15.099
	156.875	18.414
	93.113	115.165
	339.447	45.733
	517.478	43.022
	149.17	102.978
	125.092	43.679
	134.972	113.932
	188.827	73.025
	74.793	232.953
	118.209	84.436
	111.846	64.596
	45.904	83.092
	74.845	99.129
	116.617	65.282
	66.582	15.113
	66.613	21.158
	78.215	34.266
	81.311	16.125
	54.879	125.087
	59.319	44.751
	61.775	53.282
	74.887	16.021
	170.252	8.385
	178.049	11.317
	79.038	15.223
	139.817	18.534
	130.483	54.276
	66.087	93.481
	133.367	170.324
	189.227	26.729
	46.535	78.091
	26.476	109.044
	44.56	126.568
	130.789	142.998
	157.498	18.447
	121.214	27.426
	73.137	57.52
	113.162	55.278
	85.413	50.331
	88.825	67.482
	86.395	15.93
	97.472	16.177
	45.146	12.98
	105.3	63.322
	112.289	136.388
	122.68	121.028
	125.868	196.738
	61.58	66.36
	69.53	152.976
	322.662	196.488
	47.355	57.675
	48.376	47.167
	463.556	62.285
	111.628	31.71
	113.75	86.112
	152.539	74.082
	55.414	83.89
	98.564	58.054
	56.085	25.669
	62.297	67.108
	130.325	13.606
	87.616	50.714
	151.128	98.545
	47.386	27.213
	71.421	39.74
	143.939	38.093
	195.576	41.202
	134.63	29.424
	11.61	29.831
	228.109	33.203
	111.399	26.95
	52.338	16.551
	68.71	14.653
	235.361	55.339
	64.581	57.532
	100.969	8.21
	111.658	54.23
	41.325	82.115
	464.223	93.787
	157.739	23.256
	13.021	18.981
	194.925	10.638
	110.622	17.427
	22.241	9.03
	12.323	20.65
	28.381	60.726
	128.559	10.32
	107.774	10.5
	88.891	9.03
	102.597	6.085
	273.896	8.775
	109.684	7.933
	82.731	10.034
	98.466	39.015
	74.421	60.137
	113.228	99.788
	103.313	10.638
	310.96	73.544
	70.687	98.631
	80.899	65.81
	67.802	71.213
	154.976	143.435
	60.451	57.88
	110.342	160.696
	68.921	116.743
	86.442	121.077
	129.891	126.182
	80.136	63.985
	94.264	114.507
	83.887	89.676
	56.612	139.845
	163.151	68.387
	224.799	12.77
	132.372	62.498
	156.771	43.543
	89.341	83.502
	82.642	125.172
	105.469	31.287
	121.049	92.99
	74.186	64.532
	104.35	101.01
	41.265	76.766
	52.89	71.576
	71.155	147.606
	138.532	44.017
	54.973	61.975
	48.82	38.872
	75.594	16.905
	45.044	14.552
	266.392	15.331
	92.082	24.488
	92.851	46.12
	69.229	75.718
	177.695	36.505
	204.344	165.107
	244.791	172.898
	56.892	216.236
	68.517	40.174
	99.71	25.188
	229.106	168.665
	72.425	15.223
	139.639	49.436
	155.055	31.347
	60.653	50.836
	13.297	52.571
	28.654	18.93
	46.175	30.771
	34.734	100.392
	27.128	102.46
	210.045	10.397
	85.72	11.022
	147.872	13.44
	76.896	18.749
	35.109	10.198
	30.054	14.112
	51.636	51.805
	43.061	12.528
	62.38	150.359
	81.378	36.946
	74.282	56.815
	62.356	34.614
	43.717	73.263
	29.782	40.229
	94.979	65.805
	127.309	66.169
	246.126	58.613
	93.661	95.462
	75.641	70.73
	125.444	32.539
	121.467	114.114
	88.185	14.703
	183.057	16.52
	187.744	10.468
	252.961	17.028
	154.423	11.484
	88.931	67.136
	205.476	27.697
	97.745	140.48
	56.914	37.278
	222.913	70.161
	69.232	14.243
	54.906	62.857
	85.142	125.591
	100.374	82.731
	73.52	79.988
	12.168	20.68
	15.386	14.891
	59.999	14.19
	17.307	14.803
	123.181	97.408
	100.826	86.06
	40.676	218.876
	62.874	31.556
	64.5	88.084
	61.422	117.477
	28.446	38.555
	71.105	66.304
	13.894	125.793
	61.247	61.003
	68.114	23.943
	48.229	24.367
	72.984	133.744
	93.023	49.227
	29.536	55.101
	56.065	53.499
	57.012	59.339
	20.942	52.423
	9.46	39.891
	17.605	14.007
	70.985	36.606
	45.409	75.946
	36.161	128.285
	85.523	9.62
	109.771	62.618
	24.095	40.966
	32.437	16.93
	147.982	135.801
	40.507	89.008
	48.922	91.61
	89.084	37.858
	16.77	27.787
	138.697	43.882
	120.884	59.619
	22.822	19.744
	27.694	52.571
	22.213	150.539
	57.582	84.327
	93.976	50.171
	25.293	56.192
	99.016	76.82
	29.654	27.914
	120.382	65.529
	59.886	73.09
	95.181	49.436
	126.162	46.947
	99.941	61.285
	67.596	74.107
	60.231	142.637
	42.118	144.849
	89.084	170.758
	43.522	47.822
	47.991	48.946
	56.819	8.21
	39.844	11.544
	80.354	28.641
	14	59.718
	54.092	64.492
	50.352	139.3
	48.191	74.998
	22.426	63.956
	30.866	148.244
	22.015	74.122
	22.77	52.493
	11.948	39.112
	76.798	58.509
	60.384	108.789
	80.031	54.663
	79.317	72.117
	100.292	76.67
	81.283	32.148
	19.617	17.23
	46.175	26.394
	44.733	124.691
	42.59	18.89
	36.355	23.798
	35.354	45.668
	34.625	96.095
	37.61	33.102
	27.196	12.791
	33.096	22.055
	55.071	68.343
	28.737	97.609
	30.828	37.499
	61.005	144.804
	70.29	44.875
	64.837	21.528
	45.922	51.857
	15.019	52.752
	33.219	94.039
	34.674	96.522
	13.924	71.747
	39.645	121.455
	87.72	20.668
	38.633	28.795
	125.092	14.243
	113.676	24.107
	101.294	13.901
	9.46	14.146
	17.605	17.316
	18.998	17.401
	41.285	24.416
	46.448	99.305
	55.96	102.557
	93.992	35.278
	92.305	24.34
	49.058	27.708
	108.107	66.119
	36.94	13.953
	66.105	10.034
	76.579	6.937
	52.993	26.169
	10.32	26.729
	6.717	30.663
	12.162	20.142
	23.724	42.719
	41.491	124.573
	69.623	76.583
	12.929	107.997
	11.474	130.071
	38.853	53.885
	94.99	92.271
	96.397	18.97
	35.26	48.134
	17.957	56.714
	28.292	117.833
	7.788	11.697
	9.615	9.806
	120.587	9.235
	8.979	104.202
	257.015	118.948
	20.925	17.708
	36.81	65.496
	18.565	32.327
	22.426	61.003
	38.984	41.325
	22.721	114.345
	27.441	34.53
	48.687	19.326
	48.392	17.646
	56.085	57.279
	37.693	24.099
	20.731	99.228
	42.94	96.906
	44.914	103.715
	50.169	34.271
	78.819	69.66
	69.702	25.516
	52.725	214.278
	56.085	66.937
	19.393	36.669
	41.97	12.238
	197.611	60.28
	209.632	9.499
	71.752	7.297
	36.283	70.541
	54.696	54.825
	19.095	111.153
	49.615	115.002
	23.874	75.768
	21.569	62.658
	66.091	186.15
	44.43	116.18
	82.864	170.343
	49.413	14.696
	39.823	60.979
	57.485	116.324
	75.18	18.163
	26.311	19.095
	91.742	20.64
	85.677	34.884
	98.263	68.934
	145.847	14
	94.99	18.981
	83.65	86.213
	44.204	44.753
	96.418	44.794
	60.575	21.528
	127.076	14.722
	25.163	19.037
	17.84	8.484
	70.567	7.794
	60.421	24.095
	23.786	202.371
	107.264	122.12
	57.626	95.153
	42.964	25.656
	46.522	151.128
	23.256	57.723
	22.71	64.5
	44.878	15.6
	57.581	10.34
	49.122	7.74
	45.881	33.196
	86.981	11.474
	68.836	21.926
	46.482	26.594
	48.086	58.99
	42.359	24.095
	13.13	7.354
	85.998	15.215
	74.998	68.467
	11.314	5.439
	17.074	6.641
	53.338	55.814
	81.722	55.911
	16.9	39.74
	15.044	53.858
	59.626	24.211
	112.707	73.135
	10.465	10.965
	70.068	11.948
	41.69	7.978
	14.239	15.858
	60.219	53.188
	142.225	24.955
	97.136	16.177
	77.036	10.034
	70.86	20.15
	20.644	13.351
	70.556	13.713
	21.505	51.362
	38.004	38.186
	60.579	86.077
	37.217	23.256
	26.218	11.213
	54.308	10.776
	52.365	22.194
	23.479	30.149
	27.445	58.004
	104.512	139.728
	38.004	65.489
	109.46	73.146
	39.013	78.967
	69.861	115.64
	73.996	78.279
	103.937	79.428
	88.034	38.365
	44.247	21.569
	84.998	19.611
	126.935	27.787
	11.264	26.881
	17.031	35.636
	17.65	42.175
	93.796	5.841
	32.901	12.698
	95.744	10.965
	33.237	11.61
	63.093	9.302
	133.065	13.351
	165.053	12.672
	41.163	26.198
	75.71	120.317
	77.033	82.367
	58.474	35.935
	45.133	11.57
	54.253	15.331
	29.423	24.324
	66.374	91.565
	62.083	87.345
	35.31	49.253
	126.584	110.327
	54.437	56.341
	72.199	66.22
	145.869	97.089
	110.218	106.409
	74.633	52.762
	49.241	73.88
	17.355	59.738
	131.282	45.774
	66.588	8.159
	39.653	6.88
	11.858	15.019
	8.082	15.575
	19.634	62.069
	11.981	46.994
	18.209	87.319
	12.226	166.549
	85.998	125.41
	106.719	13.155
	20.446	13.598
	17.733	23.91
	25.662	18.998
	43.19	67.537
	15.507	40.566
	69.68	22.327
	34.803	17.135
	93.934	8.854
	100.406	12.9
	129.428	60.914
	144.578	38.652
	105.228	10.066
	21.088	15.504
	47.334	18.223
	23.4	12.929
	40.793	29.816
	24.28	46.86
	197.889	42.481
	85.766	36.568
	40.575	34.593
	74.246	43.258
	111.814	26.936
	55.369	81.638
	52.177	25.41
	94.87	61.464
	18.924	20.242
	119.268	125.983
	156.284	82.229
	25.662	20.68
	23.265	10.391
	37.789	98.72
	15.218	90.77
	32.698	83.962
	96.191	91.217
	19.859	227.801
	35.643	92.729
	59.197	19.799
	39.653	31.832
	51.933	13.434
	82.73	52.064
	80.789	43
	70.414	28.079
	159.03	19.23
	105.374	183.891
	103.415	15.997
	6.936	17.427
	24.363	15.746
	12.407	20.821
	12.17	14
	17.42	12.9
	49.248	18.861
	72.286	45.288
	84.138	15.044
	43.015	43.651
	131.037	15.215
	220.474	20.498
	74.96	66.937
	92.02	66.793
	66.667	39.765
	57.303	10.356
	54.254	15.746
	59.13	19.101
	60.912	22.612
	139.343	70.834
	48.453	130.553
	21	31.162
	42.782	76.772
	92.917	43.651
	49.058	52.762
	63.266	34.71
	23.164	31.493
	30.258	12.522
	47.512	8.678
	30.16	32.87
	18.97	35.481
	28.563	51.199
	26.828	39.808
	50.648	15.058
	51.797	96.948
	46.242	78.076
	60.175	14.696
	35.803	22.194
	22.368	100.679
	15.699	7.692
	94.872	9.122
	37.941	114.194
	44.178	21.083
	23.076	24.218
	18.531	48.585
	37.125	86.307
	32.327	55.339
	67.833	33.716
	128.127	64.218
	67.004	62.265
	27.205	89.704
	12.075	55.288
	17.652	52.925
	14.188	52.177
	39	65.501
	53.843	54.009
	25.823	26.001
	24.15	14.708
	121.365	15.113
	91.714	18.255
	12.167	48.586
	155.743	28.487
	69.36	42.16
	75.951	27.186
	118.341	67.303
	48.704	51.761
	27.341	15.852
	142.821	8.11
	18.229	11.943
	16.77	3.1
	20.139	7.295
	66.516	188.283
	69.379	70.668
	12.916	94.121
	60.227	81.022
	34.614	8.654
	43.298	32.437
	44.412	91.201
	64.092	101.175
	31.738	65.282
	52.76	26.872
	83.733	59.326
	58.803	69.06
	61.828	79.027
	68.83	68.442
	65.947	42.994
	62.329	99.436
	30.221	123.809
	13.438	16.425
	78.368	181.089
	71.571	80.289
	93.108	9.589
	61.233	8.11
	108.742	17.194
	81.892	40.14
	101.709	27.963
	32.144	64.849
	40.79	12.066
	66.561	22.697
	32.082	40.369
	33.793	80.089
	27.697	10.316
	53.175	11.693
	57.912	7.095
	60.87	16.357
	28.98	10.459
	93.807	22.186
	154.265	46.907
	291.756	57.504
	88.847	95.245
	157.518	64.843
	74.153	83.404
	96.533	59.475
	11.283	99.589
	35.825	67.982
	21.441	62.054
	13.56	11.693
	12.9	59.22
	48.941	38.849
	77.562	59.543
	5.64	8.597
	188.556	17.28
	98.784	24.798
	130.496	37.94
	32.914	56.302
	93.342	20.037
	37.468	24.931
	63.21	10.874
	65.818	25.563
	61.495	27.897
	180.829	11.209
	191.74	17.065
	56.685	72.389
	83.603	15.21
	161.155	11.01
	77.467	20.776
	8.654	12.672
	11.279	11.693
	91.701	7.55
	85.084	14.308
	88.844	8.597
	41.972	8.597
	42.207	122.961
	52.455	16.152
	44.271	139.508
	68.335	53.903
	117.044	21.146
	108.35	13.862
	208.558	10.42
	156.084	15.812
	73.711	59.939
	105.048	136.224
	60.641	167.693
	59.749	139.508
	9.272	13.429
	136.25	15.379
	149.185	21.561
	40.011	11.176
	9.845	8.773
	14.205	12.036
	31.861	74.774
	60.267	112.572
	12.067	86.949
	6.45	86.215
	12.721	73.357
	4.651	92.665
	12.672	38.721
	8.576	100.589
	7.975	70.485
	34.484	124.265
	71.807	46.512
	155.342	85.906
	7.625	141.486
	45.083	189.259
	73.344	143.031
	51.087	101.683
	104.333	14.321
	31.913	19.03
	50.466	22.891
	68.564	217.166
	16.533	13.995
	24.092	15.991
	22.755	14.146
	29.683	16.425
	29.974	10.942
	67.086	15.21
	25.27	119.65
	91.005	133.107
	112.98	109.422
	27.281	132.617
	52.245	78.534
	8.489	87.739
	9.793	109.993
	13.615	41.622
	42.025	46.264
	60.354	64.581
	45.375	92.665
	46.617	31.529
	53.147	42.167
	179.663	60.185
	8.605	58.517
	10.093	13.782
	9.761	9.259
	7.049	10.494
	9.969	9.496
	40.746	19.453
	58.748	12.39
	61.856	14.205
	148.257	7.295
	10.32	11.943
	7.767	8.511
	10.093	15.805
	15.652	9.122
	20.68	15.805
	23.716	19.088
	9.164	46.341
	18.97	17.723
	77.936	120.202
	79.27	67.938
	24.822	75.277
	89.155	46.024
	120.973	140.319
	48.973	168.804
	71.342	9.139
	16.933	145.312
	14.961	90.285
	103.882	75.07
	12.311	83.952
	15.002	44.016
	11.77	56.093
	8.26	42.336
	9.867	18.255
	16.444	112.005
	41.406	17.422
	35.334	7.792
	32.889	9.62
	56.276	13.874
	67.516	87.087
	10.198	42.24
	17.282	13.106
	80.078	7.402
	22.023	14.495
	63.972	101.84
	40.679	75.134
	234.748	13.605
	14.871	70.098
	129.356	23.248
	23.3	30.311
	62.609	82.098
	13.06	10.643
	30.588	8.678
	87.611	16.125
	68.055	18.749
	62.455	12.229
	14.116	12.32
	10.812	19.617
	13.924	18.871
	49.266	14.243
	43.432	39.664
	41.058	46.535
	27.38	55.769
	56.914	83.182
	102.911	49.045
	57.012	96.065
	15.099	96.065
	19.047	13.297
	29.88	12.528
	72.2	18.293
	103.574	9.504
	229.971	14.423
	12.311	21.158
	53.147	19.046
	98.009	17.422
	12.331	13.134
	33.546	50.678
	26.843	33.861
	29.204	14.835
	17.138	76.235
	48.628	24.337
	42.043	16.551
	12.708	27.801
	16.948	34.158
	9.523	32.252
	20.297	72.164
	14.046	89.664
	156.651	77.482
	48.89	60.04
	51.812	32.855
	51.664	17.717
	43.484	23.907
	29.991	17.079
	11.264	19.691
	16.075	17.655
	28.387	13.44
	24.913	9.62
	21.624	20.037
	71.296	88.662
	30.832	96.614
	12.005	52.906
	8.917	30.164
	17.21	45.676
	14.533	110.407
	3.594	118.406
	12.941	148.9
	73.753	232.988
	78.534	70.124
	40.126	14.891
	73.249	8.984
	52.953	14.321
	156.034	268.921
	13.021	14.653
	204.9	10.034
	71.125	17.355
	74.793	149.935
	60.729	12.229
	111.062	15.534
	97.036	107.057
	65.495	41.773
	68.322	13.44
	48.345	11.954
	43.061	15.223
	40.904	13.683
	37.371	39.411
	48.069	13.162
	72.067	10.361
	45.635	49.982
	48.151	95.364
	74.656	130.096
	99.148	160.382
	139.941	129.351
	36.771	76.622
	30.054	89.522
	54.758	87.781
	55.875	98.693
	10.965	81.188
	11.283	40.877
	45.741	41.681
	142.441	18.293
	40.182	59.026
	81.564	144.687
	122.082	8.983
	47.081	8.984
	53.675	14.243
	91.465	10.325
	80.348	21.58
	162.756	12.407
	91.331	33.521
	16.905	21.363
	59.095	18.414
	83.904	55.416
	100.343	194.919
	30.127	16.074
	255.12	14.627
	150.533	66.119
	99.875	36.828
	77.317	82.914
	94.839	33.861
	51.358	132.151
	52.317	62.349
	64.706	35.422
	14.728	24.639
	80.089	59.214
	43.236	42.222
	65.841	78.907
	93.887	14.853
	43.694	29.669
	96.065	36.025
	128.434	72.979
	115.455	81.429
	54.28	27.921
	41.686	34.403
	81.963	39.181
	116.162	25.8
	128.019	119.972
	23.443	39.603
	47.845	10.198
	60.726	10.42
	96.418	18.949
	172.121	11.484
	92.423	37.527
	208.447	47.104
	32.877	6.937
	195.167	47.999
	128.761	35.403
	31.493	62.084
	27.49	61.36
	59.256	25.418
	52.002	15.002
	91.683	39.603
	235.08	24.237
	142.722	20.821
	17.399	25.687
	120.837	25.047
	69.961	34.452
	113.108	31.509
	97.192	99.312
	74.887	14.803
	43.114	20.397
	45.727	24.28
	108.898	43.249
	68.507	57.1
	215.767	63.445
	40.977	12.077
	112.702	13.924
	9.302	75.685
	13.104	54.291
	54.261	40.696
	29.712	13.385
	32.328	10.361
	85.449	21.939
	155.643	10.034
	71.758	20.252
	73.092	56.586
	36.753	77.628
	136.487	69.349
	79.001	77.52
	112.949	12.32
	86.277	17.463
	20.088	16.618
	47.161	9.735
	65.858	61.098
	126.864	47.441
	14.278	58.978
	29.204	12.916
	59.468	136.397
	102.273	10.071
	63.223	158.341
	86.848	176.011
	118.889	105.641
	39.631	7.095
	31.281
	30.123
	33.597
	44.547
	20.088
	10.638
	79.615
	23.292
	44.346
	64.793
	53.453
	20.791
	138.895
	115.935
	82.608
	62.522
	64.655
	87.824
	109.111
	120.941
	2.92234e-17
	shSCR	shMACF1.mix
	60.249	42.16
	60.4361	45.0183
	1.8651	1.40958
