# Supplementary material for: MACF1 controls skeletal muscle function through the microtubule-dependent localization of extra-synaptic myonuclei and mitochondria biogenesis
Source: eLife. 2021 Aug 27;10:e70490. doi: 10.7554/eLife.70490 (PMC8500715; doi:10.7554/eLife.70490)
Supplement: Figure 2—source data 1. [file elife-70490-fig2-data1.xlsx]

## Sheet: 2C
EB3 comets speed	1st day of late maturation		5th day of late maturation		10th day of late maturation
	siSCR	siMACF1.mix	siSCR	siMACF1.mix	siSCR	siMACF1.mix
pooled data from 3 individal sets of experiments per condition	22.428	19.7426	12.7971	29.185	16.6345	8.196
	34.2194	21.0635	18.458	31.08	21.3429	16.1718
	28.4979	22.891	24.1105	27.6918	25.1063	16.08
	10.3954	52.9768	22.2	23.4873	15.4671	28.236
	30.4476	21.6988	16.92	26.9067	16.3872	17.1757
	13.455	34.6371	14.9455	35.09	18.2708	36.96
	37.696	20.3844	21.6952	31.904	17.472	14.9876
	34.2194	21.9	16.17	28.7057	19.7712	29.8171
	37.7778	26.3382	13.91	23.4873	28.716	43.68
	34.8	22.44	21.51	19.845	17.7408	19.1945
	9.534	26.7525	19.68	31.5467	9.15428	25.1261
	29.576	22.5032	32.72	26.4409	13.3323	17.8674
	28.0871	23.5964	23.784	22.7859	21.888	25.1349
	13.4463	32.652	12.2471	20.5248	9.38545	18.7333
	30.536	21.5182	29.3486	31.27	18.4632	18.9086
	19.5867	19.49	16.085	24.42	16.896	17.4139
	19.7571	18.1482	14.71	22.0473	14.6434	29.7474
	25.0114	19.2862	17.49	24.06	43.47	17.2875
	23.1855	24.5314	25.07	31.5467	16.5943	15.2471
	22.26	26.496	18.65	19.116	13.1229	13.5433
	33.9339	22.2923	19.6674	26.29	23.188	15.6571
	37.5086	31.4933	15.246	25.531	18.96	16.7226
	19.185	29.4771	20.92	21.7005	16.614	16.344
	47.18	15.9393	21.108	25.0286	31.5675	16.968
	34.38	23.6016	18.341	23.5457	20.4444	15.6756
	22.176	14.5263	20.9224	25.531	25.705	19.6044
	38.1554	26.1551	19.8686	23.6564	16.12	17.57
	50.715	18.2832	16.5164	14.8	16.9477	18.1074
	23.816	23.4514	25.2533	20.3727	7.88333	17.2114
	33.936	17.5733	19.1446	19.7245	24.8333	15.7371
	40.8568	23.7339	28.36	20.74	23.8926	17.688
	21.7475	26.6475	13.59	22.6629	24.9561	14.76
	25.89	28.7328	32.5985	24.904	27.7395	13.7564
	35.6229	25.62	34.0061	20.9451	30.1125	12.3508
	16.032	15.912	24.0868	32.6909	21.5491	29.1111
	16.9867	23.1158	11.1267	19.7245	22.6473	33
	23.6693	43.2075	11.4	20.5629	16.7633	32.94
	45.8571	33.1347	24.132	25.1354	22.21	27.764
	13.6418	33.5265	7.74369	21.6185	18.63	14.3836
	21.5908	32.4083	16.8436	20.7675	23.2387	25.392
	28.77	31.215	17.5139	17.8526	21.864	22.6296
	16.272	35.927	25.9145	14.5943	16.47	31.4914
	50.54	23.2023	24.8218	36.0867	24.2632	22.0964
	26.7333	22.6067	17.9033	21.8784	16.3547	20.8852
	22.0748	16.0577	24.8218	23.688	15.0862	26.8909
	25.0691	20.81	19.3	22.9126	18.5829	18.4938
	19.0547	22.755	17.7277	15.8708	16.3547	16.0717
	14.2926	36.0712	19.3662	25.925	35.76	16.845
	15.6429	32.6123	22.4073	21.918	17.6	14.52
	13.1333	45.1835	18.6	20.2176	35.2243	17.7379
	21.6	34.0527	21.784	29.184	18.7263	18.5189
	24.4906	47.412	20.91	22.5533	16.655	13.1647
	30.1611	14.718	32.8691	20.9412	18.3663	25.065
	25.7314	43.9784	13.16	23.9657	13.56	25.26
	24.924	27.9892	28.6691	24.5922	33.15	13.6178
	11.3376	31.536	23.75	22.0529	26.664	16.48
	11.7086	24.5782	12.2587	16.5965	14.12	25.6518
	22.7952	33.03	20.3346	38.136	16.9412	15.7309
	21.2544	40.6133	53.0914	24.7958	22.4865	23.4733
	11.2246	21.552	14.3165	16.26	10.8126	23.91
	19.94	22.1495	15.504	18.4	11.2171	11.953
	34.472	20.3645	16.6743	16.6708	12.6	14.97
	43.8	30.976	42.6189	19.0344	11.6471	38.4
	24.1304	19.8692	9.312	20.0657	12.708	21.8533
	17.3184	16.3104	19.864	30.75	10.6964	25.518
	13.8764	18.2471	15.98	19.0344	27.4029	27.5298
	14.8714	31.32	11.4771	25.65	11.7709	20.69
	25.245	21.48	17.48	31.4154	16.3015	18.525
	9.67	23.9073	47.0133	18.1086	17.832	14.694
	9.195	35.556	30.645	27.0282	23.28	18.9764
	24.9771	20.3645	20.8733	27.9825	12.156	23.1648
	18.372	15.324	15.1059	30.4333	17.832	48.51
	23.0467	20.172	7.104	25.3371	15.64	16.161
	12.5263	23.8029	17.1491	27.6273	17.6753	22.24
	11.7669	18.9321	19.53	26.3905	12.8564	29.337
	16.105	20.7771	15.2433	34.15	15.2	36.7667
	18.8492	25.0255	26.04	20.1145	17.1168	26.145
	15.1636	26.94	14.4629	29.12	13.016	17.4083
	17.8416	20.6021	17.5577	35.46	12.6514	36.0655
	17.9184	22.512	24.288	26.8452	15.7006	18.5929
	15.928	21.485	24.7125	25.3892	20.0166	28.8071
	10.332	24.26	17.3018	19.1373	14.5895	17.769
	23.22	21.3067	22.1564	24.1822	20.6767	25.95
	23.4923	19.8847	25.63	28.6094	16.8663	21.9741
	15.2035	22.72	29.56	20.44	13.5982	16.58
	10.8855	28.6338	22.48	26.832	21.468	17.8516
	20.36	17.7092	16.34	36.0772	11.0451	16.7333
	19.884	20.764	18.9862	26.715	17.9829	22.607
	24.5657	21.0756	12.6947	24.56	12.1364	21.6218
	24.96	34.0094	18.5946	18.1875	17.3908	16.3608
	20.2748	28.33	17.58	30.2298	12.1862	23.08
	18.12	29.71	21.372	25.68	12.1776	23.9123
	21.944	22.3344	23.0329	33.2954	14.52	30.285
	52.96	17.424	20.7382	20.9509	12.4933	18.4567
	36.9	22.8467	14.9305	28.596	15.536	53.46
	19.4957	29.94	27.7543	20.64	11.0622	25.32
	13.76	24.9073	13.7564	16.68	12.1862	20.8691
	24.8571	18.8109	18.5946	21.5612	21.2073	24.9511
	25.065	35.848	18.9943	20.8985	25.475	44.9867
	28.635	32.1648	23.56	24.1105	17.9829	24.552
	42.288	30.195	15.48	19.1867	17.9845	20.4343
	27.7371	19.26	18.5905	19.6091	12.976	16.7815
	21.1992	25.4215	19.9418	18.6632	14.664	28.52
	27.5539	20.01	16.3667	30.0993	12.976	29.016
	21.24	18.12	22.9846	17.2421	10.338	15.5111
	26.4	20.5368	18.1461	21.46	17.8212	14.3454
	23.76	21.8308	16.0667	21.912	17.2928	17.3471
	36.5	20.6188	14.96	20.505	17.5958	21.84
	13.5075	25.8375	15.2509	30.0993	12.8	24.9267
	25.0371	28.32	20.76	17.9169	11.4432	21.0554
	12.4229	24.0933	25.6593	19.7662	16.2741	25.316
	15.6823	50.32	22.44	29.3657	20.8389	17.7785
	15.9371	23.1097	21.8513	23.6844	18.7371	19.6607
	15.3463	24.2486	20.3	19.2619	16.4035	18.7086
	20.4	19	25.81	19.9644	16.2741	15.9663
	13.0629	55.1733	15.032	26.8933	16.56	17.4379
	13.6586	27.1543	26.655	22.5183	41.66	18.7586
	13.8212	40.44	25.68	20.0229	15.2914	18.38
	27.64	55.82	12.5107	26.8933	7.18909	26.6188
	19.84	40.44	26.4643	24.7768	11.892	17.112
	32.544	19.7236	17.184	25.7529	17.5513	18.8965
	36.8057	23.52	13.77	20.6765	18.024	23.152
	17.6673	21.1309	17.8527	19	18.15	28.8225
	19.518	17.5575	19.4716	23.1368	22.7492	42.36
	13.7115	19.6989	24.87	18.5215	14.96	21.7395
	20.04	20.1415	18.4667	26.1938	16.3886	24.7407
	5.733	31.14	17.752	18.8753	30.945	16.3992
	18.735	31.4688	25.6737	35.37	7.5108	21.4518
	18.264	20.06	14.2286	24.2673	15.345	18.572
	19.4133	16.9431	23.7456	22.2141	12.6063	17.04
	22.47	24.8346	35.616	16.2109	17.2267	16.8164
	14.536	15.6	22.8144	15.2782	17.968	16.3464
	28.6933	28.0168	32.61	17.7017	14.0477	18.8084
	17.4	19.1805	19.1429	23.8543	12.5652	20.736
	16.7077	20.4923	22.4817	18.9938	12.848	23.2839
	7.21044	16.69	27.8914	21.8152	15.04	14.5691
	17.34	23.5971	20.9314	29.0109	52.8	38.2608
	37.248	16.5548	19.1673	22.0843	16.9148	20.2575
	30.2182	20.1474	12.8133	17.7029	10.73	24.0075
	11.4353	16.16	38.6267	22.92	21.654	22.4836
	13.275	16.046	19.935	24.1322	16.56	18.2182
	28.84	19.416	20.8473	20.992	16.0094	20.6568
	27.9257	20.1525	21.08	21.7624	20.8759	15.8175
	29.595	25.224	23.424	20.7785	12.767	15.918
	26.52	19.9974	19.6457	12.9069	16.0848	27.8564
	13.04	21.04	23.0133	23.0175	19.7414	20.9664
	30.4178	25.6114	24.9829	19.6933	13.7012	22.0914
	17.312	19.96	28.115	20.2933	14.3715	16.88
	9.552	21.7145	15.7733	32.89	32.2457	20.75
	12.6514	19.635	18.9733	22.5927	12.2618	20.9943
	18.792	17.896	14.3933	25.9022	29.07	23.3432
	11.245	24.7516	27.3767	29.7916	17.6779	28.3778
	16.2343	23.5467	26.3378	17.92	14.76	19.0756
	26.9833	22.8533	17.7462	22.5927	16.8144	21.5432
	16.2073	27.576	17.3236	19.5764	12.7661	25.92
	35.68	23.9257	20.54	23.59	14.8512	29.9616
	8.49091	20.7953	20.616	13.398	19.8632	33.3733
	19.5576	21.4582	22.1379	17.0047	11.5822	18.2743
	27.0667	19.92	15.12	23.136	13.968	26.12
	13.0756	20.7953	17.232	16.38	17.9788	25.152
	17.6889	15.1165	20.66	22.68	19.1088	17.4273
	23.0867	17.9771	14.6118	21.474	12.9352	22.74
	26.8964	14.8286	20.66	18.282	18.424	33.0857
	14.112	28.6933	14.4764	26.9867	13.7791	25.456
	10.1143	20.4525	24.0695	11.868	12.276	24.9436
	18.312	16.5733	20.6585	22.71	14.9333	30.9171
	24.608	23.4	22.4812	17.8295	20.968	33.8657
	18.8933	22.44	19.2533	14.9067	33.816	25.1116
	14.5406	25.518	19.9267	14.8	17.6439	17.4273
	17.304	19.1673	16.6731	31.13	14.2636	22.1908
	23.1867	29.58	14.6497	28.513	17.6439	27.3086
	18.7938	15.8727	30.784	22.86	20.2	27.8514
	17.04	19.1684	15.2308	39.0277	18.216	37.665
	19.936	30.6162	19.2	19.2943	20.968	20.3357
	18.24	48.6933	10.632	38.415	13.968	30.9086
	19.5724	11.832	18.1714	27.0109	14.544	19.0023
	19.0886	31.6091	16.725	31.4836	17.0541	53.46
	25.41	17.088	13.4914	24.94	20.3376	21.0247
	36.345	26.6	19.2231	23.826	16.326	20.64
	22.784	17.088	14.7338	29.1857	16.155	16.9513
	27.0267	27.1745	15.3046	23.66	28.4857	22.8736
	23.9657	24.18	19.24	31.48	9.4272	39.2544
	18.93	38.3314	26.4642	21.3046	25.0611	16.7184
	24.7015	28.62	21.2016	18.5667	11.2737	26.37
	34.2622	25.7533	23.944	17.8133	15.63	23.2254
	11.2851	30.66	19.216	28.6267	11.453	20.28
	10.9092	20.496	19.4222	22.6457	24.53	18.3969
	23.2343	19.19	15.39	21.5127	22.2316	31.005
	8.57684	12.7418	18.51	17.8629	7.65382	22.056
	7.42435	24.18	11.9647	24.3975	20.5131	23.2254
	13.2707	17.6945	19.851	22.62	23.64	19.062
	19.5382	27.2509	18.8688	20.1269	18.8576	22.1891
	22.4	16.6431	32.664	39.0776	16.175	21.9067
	16.0145	13.7486	12.6408	24.12	21.7232	26.04
	22.58	18.9368	19.4631	14.16	14.8457	30.3077
	15.9029	17.6688	13.52	16.7242	16.92	31.25
	15	19.9344	11.7323	9.52571	17.6018	31.044
	23.0784	29.1857	22.09	21.6	29.4741	23.145
	23	23.1388	12.9969	12.3967	21.8922	36.5513
	35.5029	26.39	11.012	22.152	26.9775	23.5056
	11.8253	22.3486	18.7776	22.9108	18.212	24.24
	21.0758	23.8017	16.4909	16.26	14.38	23.5056
	17.7456	18.2526	19.9482	15.167	15.8653	20.8985
	34.4	26.6661	17.55	14.392	20.3707	46.008
	17.1554	21.6695	8.7024	16.1135	25.68	33.8667
	13.044	16.6431	11.2114	17.2992	18.7392	30.78
	16.032	11.8518	13.3055	19.2971	29.7021	18.4
	8.10655	19.2379	16.0425	15.167	12.2267	27.6
	22.2	14.7491	21.7385	20.5297	18.0429	45.8035
	30.7239	21.5782	13.7747	21.9908	14.0286	31.0232
	13.041	19.37	17.9478	21.0908	24.12	16.5867
	17.81	30.684	25.84	32.4114	15.9347	21.6253
	10.3527	25.17	20.904	12.312	14.385	19.8075
	9.38118	26.415	17.5964	15.576	18.1333	18.24
	13.512	31.236	18.3641	17.1943	16.6133	21.9156
	18.8435	22.4682	13.1647	18.9912	16.476	16.4
	14.8275	29.64	20.5137	14.2547	16.77	37.37
	21.2571	17.2145	21.6818	14.9053	25.1462	16.688
	12.3323	20.22	11.744	15.7084	15.95	22.2975
	17.24	28.368	24.5357	12.5833	16.7165	27.4643
	8.025	20.507	21.7488	18.96	16.6218	21.7243
	14.268	30.5929	18.3873	25.7273	21.1094	24.0533
	15.7385	17.6229	23.8543	18.072	17.1154	53.5333
	17.3143	19.2333	19.736	27.816	12.0726	17.9891
	13.152	27.9257	28.6128	16.3394	16.12	19.137
	12.4857	26.025	24.576	8.60842	16.9776	24.0063
	24.584	28.0683	20.6047	10.761	19.536	22.1673
	34.56	18.8057	17.94	14.6712	18.947	22.3333
	15.1714	26.085	38.49	20.2971	14.0909	17.4
	17.16	21.6327	17.5385	23.0424	8.59111	21.8182
	35.3486	26.3859	16.695	29.8015	14.4697	23.754
	13.6989	23.4873	20.4171	26.688	8.97366	14.824
	33.3035	30.18	14.3937	8.63478	16.4576	13.6728
	21.2308	41.784	13.05	25.7009	15.4086	25.0775
	9.96923	23.4	21.68	15.384	19.024	17.1384
	16.6473	29.2846	24.5116	31.29	12.936	15.2928
	9.436	19.68	17.7692	19.0933	10.602	18.36
	12.0133	20.3229	21.5822	13.5943	12.1409	18.8541
	28.3569	27.2087	22.1018	19.5936	28.7143	19.765
	15.4662	19.368	33.6494	18.9407	14.4	21.1067
	10.0224	20.4	18.7104	31.422	18.6	19.1916
	20.0229	37.5733	13.8286	36.8571	12.615	14.2686
	8.18057	40.8923	24.492	33.944	13.8735	13.518
	18.2775	19.32	20.3533	20.244	18.6192	15.2928
	28.6473	28.65	21.7569	37.92	18.0709	18.3573
	22.6852	27.86	16.2063	19.5343	13.8735	21.07
	16.6743	19.1061	17.655	26.3859	13.932	28.52
	12.16	28.6029	26.12	22.4667	8.81379	21.8274
	17.5533	20.3945	18.242	28.128	19.4538	32.0842
	18.44	24.8308	23.0369	16.408	13.5467	20.3964
	32.632	22.8092	19.004	31.44	27.1569	22.0339
	23.9467	29.2267	20.369	23.2674	13.7506	30.7102
	9.63467	25.2545	13.5526	21.5114	16.38	20.4261
	33.0982	20.556	27.885	34.6145	16.1429	26.0533
	20.8714	25.7657	25.8267	14.56	15.018	14.6346
	26.9788	17.104	14.52	30.3686	10.856	18.499
	12.1114	18	11.9172	23.6571	15.24	16.98
	20.58	19.5467	16.5316	15.2178	18.6384	24.3867
	29.2543	21.8021	18.3323	18.8673	13.36	28.7082
	22.6105	19.56	19.2686	49.572	10.92	12.4848
	15.9405	25.7082	14.328	27.2618	9.85895	16.7492
	28.62	22.7538	13.0694	22.7294	20.055	11.355
	39.09	22.65	17.72	14.4733	15.6821	13.9971
	16.5075	21.2256	16.02	26.12	20.4975	17.6
	17.52	21.1903	18.1015	15.6164	17.272	17.5543
	17.8333	19.4484	16.17	18.2133	14.04	23.945
	17.5486	22.6142	15.2057	20.84	12.2629	16
	12.1834	15.7689	16.17	30.2	17.7911	17.35
	13.9746	21.7091	18.0171	13.19	8.98	17.4032
	21.0455	23.2867	13.0694	20.8368	13.0032	25.9867
	35.0862	19.9579	20.292	25.01	9.74769	30.69
	17.9432	22.2144	20.6727	16.1383	13.1424	18.06
	19.5055	19.8914	16.9148	13.3537	11.4648	29.4052
	22.965	22.5982	17.5145	19.6886	12.1059	43.3745
	10.7486	20.78	16.8873	19.1314	8.9736	27.2139
	10.5576	16.884	13.1165	27.425	13.58	24.9652
	29.46	21.6133	16.28	15.0126	15.3	20.9314
	17.3568	19.9309	19.5135	18.84	11.4248	27.8677
	20.4343	25.0123	18.3	13.3418	8.83125	20.256
	15.0993	14.8588	19.7426	17.3267	20.8146	26.7158
	12.9	21.5416	21.3982	32.848	9.36	22.5657
	15.5345	20.52	20.5	13.856	11.6571	25.393
	8.91231	16.995	16.6061	22.164	24.582	26.79
	22.2133	23.8752	18.6675	17.82	21.16	27.3982
	12.3809	21.1692	12.12	29.8306	17.0073	22.1217
	26.604	29.2343	14.0267	15.368	14.7287	14.589
	13.7486	25.3371	19.5135	13.472	33.1902	29.1652
	16.5333	27.6041	18.5908	27.045	26.2433	42.2817
	5.748	21.21	12.9737	25.8739	25.65	23.4424
	13.8336	22.7914	16.94	17.28	10.8812	20.46
	14.4	19.5943	23.3325	24.3154	23.832	21.96
	16.614	16.7888	14.1391	24.468	29.016	26.5091
	18.8457	22.6146	16.94	14.6829	20.94	37.18
	19.1874	13.9111	30.0565	25.2282	23.022	25.5867
	20.5425	22.9086	21.4233	22.4613	36.124	21.7832
	6.78286	13.5933	19.8533	19.66	48.255	30.7694
	13.2686	27.9514	18.27	15.2304	20.89	28.3569
	24.1939	9.64	16.2333	19.674	19.72	26.669
	17.76	21.03	24.3323	17.8512	19.14	21.7137
	14.0067	25.2554	20.112	25.788		31.602
	19.6133	16.592	28.4533	25.056		28.1
	26.9829	15.68	14.6091	24.1008		30.673
	13.5046	22.87	19.5257	21.7056		25.152
	20.5782	19.661	24.4667	22.7631		25.4463
	13.1	15.68	11.5787	29.8377		42.84
	36.528	18.6171	18.72	22.6061		21.3333
	10.84	26.4733	14.1333	19.0992		32.7347
	30.84	32.5371	17.6682	21.3225		28.0271
	16.41	19.212	21.6655	16.1891		20.544
	13.6909	23.8267	22.752	15.972		21.6365
	12.48	30.9225	20.1133	26.1067		23.944
	12.0737	14.8146	16.6364	18.3145		27.966
	10.1169	15.388	20.1133	19.667		22.5789
	24.2871	21.14	19.6154	18.3145		34.864
	12.4768	23.9346	23.268	23.5413		18.1371
	18.46	20.48	24.3525	29.184		30.136
	14.8091	22.7467	13.8771	23.8105		23.54
	6.924	28.5046	22.8	24.9021		29.8
	9.2064	22.0008	20.1	18.0183		24.8073
	31.71	29.312	22.86	19.8194		32.8923
	17.6844	23.1525	17.1908	21.1646		21.821
	14.09	27.225	20.1877	23.228		24.4105
	26.265	18.6	19.4529	22.0909		29.8229
	13.3253	24.5925	18.64	21		20.9723
	15.708	20.44	25.5103	25.7419		28.4727
	47.04	19.5343	22.2071	15.4611		22.6125
	23.1508	33.07	22.92	21.525		25.8086
	15.6194	21.21	18.1543	20.295		16.424
	21.4062	26.94	32.424	17.7113		20.336
	12.855	24.96	14.1927	19.9139		20.3867
	16.6578	27.48	20.849	38.0031		27.3353
	17.2871	16.08	25.5103	31.6165		15.7286
	21.824	34.66	16.788	29.9948		22.8818
	27.5743	21.2067	27.5381	24.2933		24.7636
	14.604	31.64	25.672	22.873		24.66
	32.6274	55.005	12.114	30.7938		25.8
	30.73	22.5771	12.1107	25.9636
	29.2	26.7733	22.512	28.9543
	21.33	18.4418	32.685	27.3213
	15.336	30.0277	14.86	33.285
	18.5506	19.672	18.6975	36.6686
	25.7891	21.9456	16.8576	20.412
	18.49	20.5909	25.0343	36.285
	20.8011	16.8831	19.9579	19.44
	18.9247	20.8659	13.68	23.6471
	19.973	19.672	14.86	26.9337
	10.0128	31.6246	27.96	23.4889
	24.795	17.6667	21.8182	23.8588
	19.1217	17.08	15.84	26.1111
	22.34	22.1647	22.8646	23.0873
	16.56	29.7176	21.5829	26.5021
	29.6769	20.3684	20.5046	20.6533
	14.576	29.23	16.2246	26.5067
	14.5886	19.8417	18.6	13.2487
	18.4055	23.288	19.005	19.3114
	21.64	21.94	17.9495	17.4581
	17.9354	22.42	14.51	23.808
	19.6957	26.9365	23.895	20.07
	26.088	19.9964	22.224	20.6533
	16.7077	23.4982	15.2486	22.2092
	23.67	19.9448	18.4888	20.52
	22.44	26.248	17.196	30.3024
	15.2436	29.3267	16.2037	20.1979
	22.5456	24.1129	12.8031	24.9231
	24.1582	28.7143	9.51385	20.4327
	27.1867	25.4571	17.316	23.392
	38.6229	21.16	13.0541	21.7157
	30.3323	26.8729	12.066	24.552
	18.324	23.9031	10.2754	29.075
	13.455	25.5914	19.515	29.305
	34.6255	26.478	14.28	13.9536
	26.7	11.7827	22.824	20.2267
	22.2	32.736	18.6	30.0497
	21.1771	19.7874	15.6424	20.7106
	14.34	16.77	14.3625	20.7491
	17.9486	37.096	24.3486	16.332
	20.5855	23.73	18.3035	13.6421
	25.544	29.76	27.51	25.5953
	15.9689	15.1467	29.4867	24.28
	11.5488	26.25	26.53	21.691
	9.5535	42.07	25.247	34.2
	14.9509	26.0483	17.1143	32.38
	18.6867	30.3552	24.1588	28.2043
	16.1422	16.908	21.5082	32.5473
	22.3745	27.0554	13.1153	24.2571
	24.0533	16.41	17.3	27.03
	25.2338	24.6786	11.6726	19.7486
	16.5312	27.978	18.5314	22.36
	16.3867	24.9853	12.5143	27.924
	20.13	17.106	18.1338	32.244
	23.2311	24.315	12.5782	32.5867
	10.875	23.8	14.7375	22.264
	17.74	23.16	20.8029	25.2533
	23.29	28.7475	21.18	23.7525
	21.1911	32.5964	18.7263	15.4361
	33.18	33.9861	18.16	19.086
	22.9314	16.88	14.8146	31.7867
	20.5341	25.448	17.9333	22.36
	22.06	21.1029	17.015	35.1733
	19.5659	36.69	22.1018	21.8
	26.232	23.7877	13.68	22.45
	26.4333	22.695	19.25	24.8469
	14.7874	23.9067	22.1314	30.18
	20.88	41.1415	17.3933	17.8272
	22.2988	13.9067	20.04	21.9231
	17.7	24.42	17.39	17.0779
	13.704	18.48	25.7018	21.96
	17.0123	21.8769	22.3867	24.54
	21.16	26.57	17.7766	24.72
	20.7867	32.36	26.742	22.9346
	25.26	25.32	28.588	25.2311
	44.02	24.795	22.96	22.8416
	12.1166	29.9244	27.552	13.752
	18.045	20.8091	30.1059	26.8662
	14.1067	33.96	18.8486	22.1486
	14.328	10.3035	26.9067	17.8708
	10.6114	32.68	30.2618	18.3807
	16.2288	27.68	11.262	21.736
	20.13	16.335	22.62	18.504
	16.9108	27.36	22.608	25.824
	14.328	20.5333	13.216	21.3867
	7.76836	39.7867	14.3673	18.3818
	16.4343	32.748	21.2775	19.34
	19.1784	25.5771	21.7964	30.356
	14.87	22.1743	24.288	15.9273
	17.4104	31.392	17.9684	25.992
	17.3048	26.64	20.2909	12.484
	14.68	35.92	20	12.887
	10.35	25.3409	18.028	17.11
	18.1146	17.0933	21.4309	17.0618
	19.4057	18.26	25.8316	24.6286
	30.4484	20.7257	14.7975	22.668
	19.62	20.142	19.19	29.0546
	14.964	22.9329	9.792	26.3749
	21.7615	18.828	19.44	29.0139
	31.8282	27.288	24.0367	20.7176
	14.9664	11.2092	21.7556	20.1024
	17.7	26.7078	18.3236	23.0073
	23.4857	9.98526	21.0171	20.4788
	17.856	25.3569	26.8985	25.8375
	18.8	34.1933	24.6429	26.728
	24.06	19.23	11.9657	19.525
	34.0582	20.08	23.98	20.2584
	13.4229	19.5382	23.0779	24.1636
	12.5143	19.26	21.2743	26.2309
	11.4343	18.2533	29.0733	23.4141
	46.4829	22.5072	17.508	22.3296
	22.296	22.8327	27.7036	22.7867
	24.06	31.0421	24.1011	24.87
	24.576	25.7952	19.98	21.6
	20.4873	20.815	22.668	16.2736
	18.7644	27.495	22.5081	17.9304
	17.88	16.11	13.176	20.8708
	19.2426	16.734	19.3248	26.4141
	27.4217	27.672	27.84	25.5236
	10.4314	25.11	23.7924	32.4261
	20.4873	23.376	22.08	29.1127
	27.5123	18.0758	19.9835	17.9304
	10.4314	30.72	23.1771	13.4914
	23.676	30.852	16.589	20.832
	15.2057	23.8087	19.2655	19.0185
	19.4267	35.39	22.108	19.6487
	9.67902	21.195	19.81	26.271
	12.1267	18.1067	23.3424	17.448
	19.5086	17.412	19.2655	25.1455
	11.9927	25.4329	17.8286	20.31
	12.9075	21.7029	23.8622	18.46
	16.76	25.53	16.4727	17.283
	33	36.4	15.1636	20.12
	19.4267	18.92	16.1775	22.6267
	16.4743	23.6333	13.6725	18.4618
	21.7778	28.0696	16.912	16.411
	13.4297	27.5179	21.8229	21.0024
	11.4686	23.8518	19.9067	24.7143
	12.6887	21.84	32.3867	16.146
	24.8118	27.4	9.87	16.9457
	16.452	38.7086	29.7766	16.411
	16.86	27.4	26.04	24.72
	20.12	17.13	17.3378	23.8114
	19.248	15.15	22.6514	20.3904
	14.8629	29.0657	18.0065	18.4776
	33.2933	24.54	20.985	19.0017
	21.4	23.2691	17.5774	19.7449
	16.23	25.6014	15.6667	21.6528
	10.7381	35.34	27.6	19.7693
	19.8986	27.54	20.712	21.0581
	29.38	19.2286	22.8978	17.295
	27.24	19.9304	15.4691	18.5461
	14.376	20.6259	21.4667	16.315
	23.4384	28.41	23.3682	19.9516
	19.732	19.76	18.8057	23.6727
	13.956	27.028	27.208	17.25
	13.7891	16.968	15.744	27.4229
	16.818	30.9533	24.6367	35.8457
	21.2178	17.4764	22.5016	28.7564
	15.944	20.6	43.0643	23.4988
	25.5333	18.1705	15.4667	24.6109
	18.7933	20.424	22.5016	16.4929
	43.344	17.0657	11.438	25.644
	18.2686	16.068	21.8692	33.1569
	13.8267	26.1209	21.2229	41.7086
	28.8533	26.3073	16.7357	25.4914
	19.007	19.352	16.64	21.0873
	28.965	19.53	20.4686	25.9644
	23.625	25.56	20.052	25.4029
	27.0528	18.24	14.9571	20.0967
	21.1733	17.1704	27.48	31.9341
	31.752	23.2026	23.009	19.6907
	19.8943	21.405	19.9754
	21.1341	22.6275	17.2421
	17.3631	24.4364	14.4554
	20.4	17.9172	27.3988
	19.64	16.5382	16.4541
	20.9136	14.3025	22.8565
	27.23	19.2048	16.302
	25.8933	29.3116	20.0914
	21.1341	16.9768	18.94
	18.2031	20.2157	14.39
	14.712	20.805	15.8538
	10.6708	25.5471	21.8743
	23.5822	32.88	28.5086
	12.0926	31.7733	16.847
	35.26	18.825	16.9725
	19.072	32.5371	11.8094
	19.7829	24.044	22.5188
	16.7032	25.5471	13.0944
	9.7185	23	23.0885
		26.35	20.3786
		31.7733	12.8632
		26.2926	17.8272
		33.6057	14.9867
		23.384	17.2533
		26.34	17.6829
		33.93	20.7873
		23.384	19.185
		27.99	17.2533
		16.922	14.7158
		33.7467	19.3344
		26.4857	14.7158
		28.098	12.3058
		31.968	25.8436
		23.13	19.52
		21.2667	16.4691
		26.01	14.0922
		25.98	14.6
		24.2743	16.6533
		29.98	14.6
		21.1826	30.8133
		23.136	12.3445
		28.1718
		22.746
		21.6667
		25.005
		18.6225
		15.544
		17.3467
		20.7432
		44.175
		18.7385
		19.0747
		22.2711
		24.7371
		24.1722
		24.7714
		15.6873
		19.696
		22.2738
		17.2909
		33.42
		23.9371
		19.77
		17.4528
		14.7367
		17.2941
		19.77
		18.43
		29.3127
		26.484
		16.7074
		25.32
		26.92
		21.5111
		22.4614
		21.56
		15.6
		21.0686
		30.015
		15.6
		29.52
		24.8
		28.3347
		24.354
		19.704
		30.9491
		18.108
		35.8714
		52.12
		24.8
		23.9829
		18.9729
		24.6831
		19.904
		39.075
		19.6667
		24.1629
		16.6
		17.1026
		18.6353
		14.5371
		30.6327
		19.32
		25.1733
		21.6313
		27.12
		28.314
		30.36
		33.4533
		15.6914
		27.6933
		36.1
		24.4414
		15.12
		23.312
		20.5243
		54.72
		26.0222
		25.9733
		25.6489
		18.9323
		16.812
		27.0057
		25.0852
		21.3491
		18.4444
		21.5475
		24.0833
		24.8667
		20.34
		25.6913
		28.84
		36.0857
		19.4829
		26.604
		23.4655
		19.9324
		18.767
		23.0133
		20.6229
		23.345
		29.112
		16.24
		21.376
		19.6235
		13.7914
		18.3533
		20.2029
		22.08
		24.1867
		27.4291
		20.565
		17.5114
		16.54
		26.208
		15.312
		13.704
		21.8274
		17.6588
		16.656
		23.5333
		19.15
		17.16
		28.92
		14.5746
		15.12
		20.5071
		19.7448
		19.1031
		16

## Sheet: 2E-H
parapmeters corresponding to myonuclei movement analysis	Myonuclei Speed			Time in motion			Duration of Pauses			Distance			Persistence
	shSCR	shMACF1.mix		shSCR	shMACF1.mix		shSCR	shMACF1.mix		shSCR	shMACF1.mix		shSCR	shMACF1.mix
	0.0876578951058858	0.155854790662175		75.3846153846154	84.6153846153846		240	150		63.5363992299281	90.6730004433159		0.991022617749607	0.546257347312709
	0.347343130060175	0.15074551402944		73.8461538461539	96.9230769230769		255	30		211.763230612703	112.535060234231		0.995360848406392	0.256322579378449
pooled data from 3 individal sets of experiments per condition	0.313903691012803	0.255871233683511		69.2307692307692	64.6153846153846		300	345		119.630913331092	99.9091577208813		0.321692766234636	0.561697326394275
	0.0547675897670227			47.6923076923077	0		510	975		24.6454153951602	0		1
		0.0666027244374758		0	33.8461538461538		975	645		0	20.9798581978049			1
	0.0545340770640203			44.6153846153846	0		540	975		22.9043123668885	0		1
	0.758403697558062	0.0860419819405037		96.9230769230769	26.1538461538462		30	720		369.241389012114	20.6500756657209		0.996226273542809	1
	0.0862642118429783			63.0769230769231	0		360	975		45.7617513977171	0		0.179396755561795
	0.298160896161788			86.1538461538462	0		135	870		152.479870634293	0		0.406174505425672
		0.220544826301057		0	12.3076923076923		832.5	810		0	23.1572067616109			0.990612598292044
	0.0564201949659871			40	0		577.5	975		21.1575731122452	0		0.275298813824379
	0.182433549546129	0.109712917830349		90.7692307692308	73.8461538461539		90	255		120.677438717867	57.3188226633576		0.988792944793691	0.980484094726017
	0.254057634027168			96.9230769230769	0		30	975		150.41120735008	0		0.998728318936764
	0.549053819482737			41.5384615384615	0		570	975		160.127169838058	0		0.994862736127407
	1.09481242685676			90.7692307692308	0		90	975		449.334285843689	0		0.899913562797243
	0.294165259675577			27.6923076923077	0		667.5	885		66.2157010054905	0		0.994097037830405
				0	0		975	975		0	0
	0.818568424055692			100	0			975		581.642785381164	0		0.537309685358497
				0	0		772.5	937.5		0	0
	0.406941104461075	0.528587215551458		27.6923076923077	66.1538461538461		352.5	330		65.8622307620978	130.128169378756		0.991163952375271	0.995411159740363
	0.180608253670484	0.150192543090527		98.4615384615385	95.3846153846154		15	45		133.063723668191	117.957695201457		0.658127189836745	0.928234743106671
	0.107959822259147			80	0		195	937.5		86.2453644735834	0		0.509043742143042
	0.110741932032109			100	0			975		109.15279841786	0		0.981576835131719
	0.0914789362550033	0.137708789638867		52.3076923076923	96.9230769230769		465	30		43.3423191105781	115.27763413123		0.021045660833317	0.202666317993641
		0.475727010791536		0	92.3076923076923		922.5	75		0	312.923843996674			0.133660800611851
		0.666846684028646		0	81.5384615384615		975	180		0	231.268611630086			0.13143689793895
	0.0752607059952271			66.1538461538461	0		330	975		44.9402235695936	0		0.998497925322964
		0.137855790356848		0	98.4615384615385		975	15		0	161.850860574935			0.989738364315486
	0.207099419650186	0.483524330078412		36.9230769230769	90.7692307692308		547.5	90		46.0875865518575	262.209151730838		0.335332071754245	0.231724301270567
		0.195760805426602		0	100		975			0	172.204825759243			0.990955404216074
	0.0978453428176894	0.712425785608577		23.0769230769231	98.4615384615385		375	15		22.0152021339801	419.743616152457		0.996655603401434	0.215268481654923
	0.0645563394149101	0.9675		72.3076923076923	12.3076923076923		270	427.5		43.3285296629192	88.3705599316648		0.983958508063814	0.608801041132853
		0.932107910835973		0	7.69230769230769		975	765		0	41.3001710056521			0.997305027233175
	0.209938377742088			46.1538461538462	0		525	832.5		64.5660973115531	0		0.997665354514452
	0.165100646972566	0.2774710016904		66.1538461538461	89.2307692307692		330	105		95.905876706754	189.837868549762		0.99870790360465	0.314001141206844
				0	0		787.5	975		0	0
				0	0		975	975		0	0
	0.0726255578658698			90.7692307692308	0		90	697.5		65.9771482569714	0		0.983265010249285
	0.173220380313695	0.315515704838919		81.5384615384615	47.6923076923077		180	495		96.7021585991832	111.875224875141		0.566043886991343	0.602240683313018
		0.496728072266686		0	83.0769230769231		975	165		0	271.280677535782			0.0761207021941221
	0.0917781140698708	0.117898531395153		69.2307692307692	72.3076923076923		300	270		62.823213391874	83.3297222765448		0.995201614741322	0.470698954476872
		0.176067148057211		0	40		780	547.5		0	62.5795073635242			0.996076646997066
	0.201534847175204	0.282697521900863		66.1538461538461	26.1538461538462		330	360		103.924910350062	69.1860323773718		0.94679708077949	0.992139644458794
	0.334806847301545	0.545797072586913		6.15384615384615	83.0769230769231		457.5	165		20.0884108380927	384.14898041536		0.985473700373829	0.103788335882205
	0.190527624008184	0.463124173413567		98.4615384615385	86.1538461538462		15	135		119.583854696845	351.155966674786		0.887588151524419	0.172931670283391
	0.194254199124629	0.450982052721213		72.3076923076923	52.3076923076923		270	465		111.420512264942	138.004719021293		0.998393052963647	0.112946350070334
		0.203790916136232		0	43.0769230769231		975	277.5		0	91.3249113033434			0.592928665640191
	0.227184518843744			92.3076923076923	0		75	975		134.520351315727	0		0.990845633840538
	0.202587201406119	0.131114895044306		23.0769230769231	16.9230769230769		375	405		44.2533274718997	21.6339576823105		0.383341418946452	0.864023833902283
	0.202807337950407			98.4615384615385	0		15	975		169.812260333091	0		0.73426397447681
	0.528587215551459			100	0			975		367.729988688555	0		0.147430300023771
	0.597904365823245	0.0655557957641936		90.7692307692308	33.8461538461538		90	562.5		209.457296163727	20.650075665721		0.554366574987194	0.561870672069124
	0.127598872339148	0.191232383215343		20	95.3846153846154		780	45		22.9677970210467	168.755199529861		1	0.926188263268359
		0.119694421881073		0	56.9230769230769		817.5	420		0	49.4561432621557			0.111429684003418
	0.0848959610289028			56.9230769230769	0		420	975		45.4439602203284	0		0.117040993594293
	0.0736519451678604			61.5384615384615	0		375	975		40.6454005208594	0		0.180933916203267
	0.282343400041967			58.4615384615385	0		405	975		107.094029317182	0		0.0269345332262314
		0.0566097717512889		0	83.0769230769231		930	165		0	44.879697632412			0.913596059183242
	0.0757398343013765			90.7692307692308	0		90	975		65.355586541692	0		0.6474602778983
	0.342707572136946			90.7692307692308	0		90	975		127.308850604497	0		0.136417510805767
	0.0963889414062702	0.111505595275653		46.1538461538462	24.6153846153846		525	735		41.8892647049209	25.088758937022		0.263566850923152	1
		0.363917068581273		0	13.8461538461538		937.5	840		0	43.6700482297528			0.119078326185811
		0.13979593262244		0	64.6153846153846		945	345		0	69.4165953439389			0.998547195295115
	0.126812302660176	0.0964448134469466		76.9230769230769	66.1538461538461		225	330		100.718463875355	64.9973532537881		0.996473959269167	0.999467468103512
	0.777502280330011	0.0814633634125224		83.0769230769231	64.6153846153846		165	345		322.028980249569	49.4426254827289		0.426322079110448	0.107575319981839
	0.970076211748575	0.159967730141144		55.3846153846154	40		435	585		266.791407885043	54.9421337838005		0.192561501162081	0.152615113803102
		0.0512142337713333		0	46.1538461538462		975	525		0	22.27819169053			1
		0.219773538359979		0	100		832.5			0	206.532669688988			0.673756251301142
				0	0		832.5	975		0	0
	0.130616734594514	0.118709899898833		90.7692307692308	73.8461538461539		90	255		106.208487517437	85.2017109989008		0.500789191275655	0.905430936919919
	0.175184885404903			64.6153846153846	0		345	705		100.625441676111	0		0.13152035211531
		0.0599276807750554		0	41.5384615384615		975	570		0	23.3717955022716			1
	0.0636081577506086	0.176720999926866		33.8461538461538	63.0769230769231		645	360		20.0365696914417	87.9712133584768		1	0.997386940187545
				0	0		795	975		0	0
		0.193824473880102		0	29.2307692307692		975	345		0	47.5359984488956			0.987135853408606
	0.136726774267614			92.3076923076923	0		75	975		131.130900776245	0		0.962379375547987
		0.12883769548458		0	46.1538461538462		810	525		0	46.2759163793644			0.987347465069555
	0.0760771222632399	0.0529543146379548		100	44.6153846153846			532.5		69.9592095524312	22.240812147941		0.322028816616271	0.931686153151511
				0	0		697.5	975		0	0
	0.114274067486897	0.13893725202407		81.4814814814815	58.4615384615385		150	405		62.1462422867586	73.4790915769071		0.991428221896344	0.117769325766186
	0.131175409291407	0.116897795849863		48.1481481481481	47.6923076923077		420	510		44.5044990685915	70.6020842098614		0.9983295034442	0.222281360441445
	0.103434648443588	0.13685894198042		96.2962962962963	38.4615384615385		30	300		95.4853054180181	67.6261915249445		0.571663325549983	0.0959723772054108
		0.159969247044549		0	16.9230769230769		810	787.5		0	23.9953870566824			0.997111852147709
	0.0593688154673814			46.2962962962963	0		435	975		21.3727735682573	0		1
				0	0		705	885		0	0
				0	0		810	975		0	0
	0.152513671518326			20.3703703703704	0		645	975		22.877050727749	0		1
	0.0911040918705388	0.299522085997009		27.7777777777778	98.4615384615385		292.5	15		20.4984206708712	176.739376033473		0.999191519457348	0.484648019449344
	0.292020341757214	0.0861486604393923		83.3333333333333	87.6923076923077		135	120		111.081650605734	73.6592128780961		0.235290269164569	0.367878998766249
	0.1659840807553	0.495070926456223		35.1851851851852	95.3846153846154		487.5	45		44.2843418108602	220.16381331728		0.976469652519629	0.985268680869946
		0.317152329330876		0	9.23076923076923		712.5	727.5		0	23.7864246998157			0.963141008598632
		0.114890406716817		0	20		810	780		0	20.680273209027			1
	0.162614508042462	0.202727808419963		48.1481481481481	53.8461538461538		420	442.5		46.0464172293646	95.2111106153386		0.996116988890437	0.638159136994547
				0	0		757.5	975		0	0
	0.149099834995878	0.324666744468728		42.5925925925926	96.9230769230769		465	30		46.6108248844935	149.976145984105		0.987422510641646	0.682929107511909
	0.11475804182394	0.146143823168078		25.9259259259259	96.9230769230769		300	30		24.0991887830275	141.666889990356		0.178386610863446	0.0389002851414677
	0.234318219047896	0.152963523449785		100	84.6153846153846			150		194.245260031805	110.111631300061		0.975906797073447	0.96067931422135
		0.221228158151678		0	73.8461538461539		810	255		0	170.965061187594			0.996450167624682
	0.089051420850852	0.0959597160068228		27.7777777777778	100		585			20.0365696914417	84.5989431675258		0.994693962915925	0.259223096399366
	0.551096393604564	0.949769920847135		16.6666666666667	98.4615384615385		337.5	15		48.1648465011022	438.898093868456		0.33761144942609	0.506443631629636
				0	0		810	712.5		0	0
		0.241645549914257		0	78.4615384615385		697.5	210		0	148.017603534375			0.971351632481617
	0.306035000699036			88.8888888888889	0		90	975		129.201108086238	0		0.994504307620085
	0.285877246383828	0.236608560942141		57.4074074074074	40		345	525		71.5218438507361	107.474415707112		0.396904317210583	0.677030602064376
	0.122685683188806			20.3703703703704	0		645	975		20.243137726153	0		0.99838919682989
		0.207289681231306		0	26.1538461538462		637.5	622.5		0	42.1351636716885			0.37452878551411
		0.39528128156021		0	78.4615384615385		810	210		0	144.879238293248			0.669279896711222
	0.191356645139084	0.0896736156331405		33.3333333333333	83.0769230769231		540	165		40.837194682052	72.1132716921509		0.0960737352942291	0.998597918876298
	0.10715585505774			70.3703703703704	0		240	975		46.5679902298074	0		0.991560355110846
				0	0		810	915		0	0
	0.0886467709507796			100	0			975		64.5572161131052	0		0.295034744285303
				0	0		652.5	975		0	0
				0	0		810	975		0	0
	0.0655787015221774	0.0691449343616276		88.8888888888889	43.0769230769231		90	555		44.5377053742107	28.0036984164592		0	1
	0.0836218114169271			79.6296296296296	0		165	727.5		50.2803833328584	0		0.9977892529789
	0.0663970339375373			42.5925925925926	0		465	975		21.9110211993873	0		1
	0.112715058641002	0.136684917160415		62.962962962963	96.9230769230769		300	30		72.6097429136403	90.5301897256876		0.418166938831301	0.968984728268912
		0.128838680054362		0	43.0769230769231		810	555		0	44.5498727348781			0.364822753442502
	0.0673547948058412	0.0953490945263226		79.6296296296296	87.6923076923077		165	120		42.1210666878142	122.313083609089		0.0342409145565318	0.997263312712057
	0.2365	0.138349261903759		94.4444444444444	98.4615384615385		45	15		116.623328788152	153.554837381334		0.995512657771046	0.997596723324044
		1.08803595988368		0	100		637.5			0	339.670633722092			0.98522817030769
		0.222981536511434		0	64.6153846153846		787.5	345		0	113.959068688541			0.993716190729097
				0	0		697.5	870		0	0
		0.15407870363415		0	96.9230769230769		652.5	30		0	123.23096648155			0.992668045552767
		0.150687680481061		0	98.4615384615385		810	15		0	172.057709106914			0.290400521482372
		0.0533477347222916		0	40		810	585		0	20.0054005208594			1
	0.298532745272608			51.8518518518518	0		390	975		118.528069180158	0		0.996672333563267
	0.182949073796112			75.9259259259259	0		195	975		95.8771578678851	0		0.991686557298321
	0.0547305282911039			51.8518518518518	0		390	975		22.1658639578971	0		1
	0.300385086181056	0.219234040469455		11.1111111111111	75.3846153846154		720	240		22.5288814635792	138.960805256539		1	0.0697784972255277
	0.0950549031411365	0.102440725408512		61.1111111111111	83.0769230769231		315	165		44.7251699789987	65.1400323614233		0.999664824775459	0.351616533436859
				0	0		810	772.5		0	0
		0.251753075673588		0	81.5384615384615		810	180		0	110.543545333847			0.997768667683725
	0.310491232654893	0.131553730783452		24.0740740740741	96.9230769230769		592.5	30		77.3018923466139	138.616696224373		0.0528644103679385	0.589901000562176
		0.131247991056054		0	93.8461538461538		810	60		0	117.843037187302			0.293375336345535
		0.308249988735694		0	95.3846153846154		667.5	45		0	232.674267015319			0.589105578336001
		0.230397549396596		0	96.9230769230769		810	30		0	190.601730215544			0.582208754450227
	0.0900151592171501	0.197542087017529		88.8888888888889	69.2307692307692		90	300		61.5132299377646	94.1027394940961		0.996954638439734	0.985887131117187
	0.0585565017238897	0.1639375		44.4444444444444	90.7692307692308		450	90		20.2019930947419	132.940560245735		1	0.684532716863614
		0.087855831372884		0	92.3076923076923		727.5	75		0	84.2996913000683			0.988466371241395
	0.0845743510863549	0.396066427785241		38.8888888888889	35.3846153846154		247.5	562.5		26.6409205922018	100.876108094267		0.998189446907577	0.662078004731465
		0.139534834360456		0	81.5384615384615		742.5	180		0	73.9892338773678			0.37818212145934
	0.121747944473289	0.1028649182484		88.8888888888889	24.6153846153846		90	367.5		65.4864297476446	24.687580379616		0.289846023731625	0.971240138390693
	0.195050752594013	0.173155881787596		77.7777777777778	75.3846153846154		180	240		130.582590916022	90.560527398429		0.195403169709424	0.478521603043724
	0.0528587215551459	0.133146042536329		57.4074074074074	75.3846153846154		345	240		23.7864246998157	84.0350182229125		1	0.49337776406961
	0.119943120022852	0.129		27.7777777777778	20		585	780		25.188055204799	23.22		1	1
	0.0556282926615984	0.141155472816484		46.2962962962963	30.7692307692308		435	585		20.0261853581754	40.1145961962682		1	0.989384554993712
		0.147150145393256		0	43.0769230769231		810	555		0	65.9062524276237			0.457997703486603
		0.0689461585501901		0	83.0769230769231		810	165		0	66.7161032687843			0.995364104852286
				0	0		810	915		0	0
		0.180282980685921		0	84.6153846153846		810	150		0	107.054540617275			0.977475351929166
	0.107303506505736	0.163426413240499		51.8518518518518	70.7692307692308		390	285		40.7064585672024	55.6591188180022		0.986988873273202	0.148403899337637
	0.132975793614344	0.080403821186579		74.0740740740741	53.8461538461538		210	225		57.0925873395186	42.0519697956302		0.960282281024791	0.19925405941813
	0.255800812265239			85.1851851851852	0		120	975		119.419215390591	0		0.221512631762552
		0.0997065758737603		0	93.8461538461538		810	60		0	92.853188749121			0.493246841010741
		0.590978473005198		0	47.6923076923077		810	510		0	120.406107836747			0.628856512788596
				0	0		772.5	832.5		0	0
	0.391170912422439	0.219945169419609		59.2592592592593	75.3846153846154		330	240		96.6564165581437	171.245271166984		0.99740285946065	0.884292072215498
		0.250320905150879		0	80		720	195		0	118.479417859869			0.235857091836755
	0.18658296579538	0.105685710423666		37.037037037037	98.4615384615385		255	15		66.1115847548272	109.433731487725		0.991491181242392	0.997197667964305
	0.241171318647702	0.590978473005198		70.3703703703704	89.2307692307692		240	105		74.48630355234	303.413305537188		0.999578487643035	0.043824761142478
	0.113311759091499	0.210244277567785		50	47.6923076923077		405	255		44.0811008592071	70.4265211776441		0.990238988674427	0.0809719379330881
		0.141836269453118		0	36.9230769230769		810	540		0	47.9433303069382			0.216733879356967
	0.192301846064982	0.209895158305039		12.962962962963	84.6153846153846		352.5	150		20.1916938368231	157.045005511929		0.995142888957477	0.994580573791388
	0.287612054915454			66.6666666666667	0		270	975		92.046759802779	0		0.996048846344765
	0.195454545454545			59.2592592592593	0		330	975		74.8960283523624	0		0.443911814432144
				0	0		810	975		0	0
		0.0706326719820076		0	66.1538461538461		810	330		0	40.8951115789573			0.995765245558794
		0.223446191797239		0	100		810			0	149.481118689162			0.974686345358148
	0.223265605529031			12.962962962963	0		352.5	975		23.4428885805483	0		0.9999767893461
		0.05641375496867		0	78.4615384615385		682.5	210		0	42.305556134649			0.953102444996402
				0	0		810	817.5		0	0
	0.153187208955756	1.6101064155036		18.5185185185185	32.3076923076923		652.5	660		20.680273209027	155.455232839971		0.996963612914517	0.994141360085061
		0.0718886681572155		0	30.7692307692308		652.5	675		0	20.4882704248064			1
	0.0769473684210527			92.5925925925926	0		60	960		66.2089793835399	0		0.395597145498216
	0.207616985095151	0.0693354166353675		59.2592592592593	30.7692307692308		330	337.5		79.7781722984821	20.8006249906102		0.991548559126362	0.992509283995124
	0.139183429373175			48.1481481481481	0		420	877.5		42.3312272942922	0		0.994263927387942
	0.134367686736413	0.30344657433796		40.7407407407407	95.3846153846154		480	45		41.2806255490465	221.68949725979		0.994353842799924	0.989328383456712
		0.153780720447239		0	83.0769230769231		810	165		0	86.6428575649627			0.541138398233724
		0.171747862068207		0	66.1538461538461		810	330		0	107.512433736305			0.458348556863129
	0.181303919182987	0.10324752307154		18.5185185185185	84.6153846153846		660	150		24.4760290897033	65.0459395350702		1	0.333333333333334
		0.0239247885635903		0	61.1111111111111		832.5	315		0	11.4838985105233			1
	0.0711776650361613	0.0477802153573196		32.3076923076923	81.4814814814815		637.5	150		21.3532995108484	32.4637567083282		0.157255187778078	0.325864521816379
	0.247626487983455			98.4615384615385	0		15	810		228.599027483348	0		0.750787960484646
	0.159717785872378			70.7692307692308	0		285	810		92.8367891377948	0		0.499315176034156
	0.286849824164872			98.4615384615385	0		15	810		243.439850494157	0		0.404970186251652
		0.122043935622473		0	85.1851851851852		975	120		0	55.9578212813648			0.995562045824515
	0.274304538044555	0.0141643686861709		89.2307692307692	90.7407407407407		105	75		167.025274889519	10.198345454043		0.755254356708064	1
				0	0		810	810		0	0
	0.167523452729525	0.0550509715396161		73.8461538461539	90.7407407407407		255	75		86.05211603292	33.8925925319225		0.993508716902142	0.987031616616743
	0.0727132941111588	0.0214627705348387		33.8461538461538	64.8148148148148		322.5	285		23.9953870566824	10.9460129727678		0.999939378533371	1
	0.169611111111111	0.0722914212688884		53.8461538461538	90.7407407407407		450	75		90.348987834112	43.890461232186		0.528333067735151	0.999414022072402
	0.0966305664750868	0.119277105002502		47.6923076923077	85.1851851851852		510	120		43.4837549137891	81.1817452762937		0.992490189451886	0.984235278993251
		0.0183575597506859		0	81.4814814814815		975	150		0	11.8406260391924			1
		0.0734451501642188		0	96.2962962962963		975	30		0	55.6266821863719			0.231031825915442
		0.0864203651945008		0	96.2962962962963		825	30		0	72.198685797508			0.969335223406287
				0	0		975	810		0	0
	0.742613270646936	0.0818130796388939		33.8461538461538	98.1481481481482		645	15		44.8838078162594	54.3057384126363		0.996649742037847	0.357304331384596
		0.167209269689946		0	87.037037037037		975	105		0	109.150783971293			0.751242944939127
	0.351477328571844	0.133784603000495		6.15384615384615	53.7037037037037		457.5	375		21.0886397143106	31.2686239597466		0.99988095964296	0.940768164452229
		0.0410577382169523			79.6296296296296			165			25.9299625403688			0.0994987939524896
		0.804374229825315			100						300.6782804795			0.183657912629693
		0.102550509604316			94.4444444444444			45			70.0136543322466			0.0979300982730739
		0.112782872684168			31.4814814814815			555			25.6197233401971			0.984761348634461
		0.649997307686731		SEM	92.5925925925926			60			374.002556877565			0.919754837193094
		0.298150507043111		#REF!	75.9259259259259			195			144.508935876609			0.0910356876221301
		0.143501138370946		1.90525	85.1851851851852			120			67.5762387837731			0.981999191075853
		0.0887306043688667		#REF!	100						64.8089801792436			0.347619749628378
		0.0579484658240235		1.89295	100						69.844046414689			0.994533156553202
		0.372677996249965		#DIV/0!	85.1851851851852			120			219.705840667475			0.0688773038734323
		0.384717432893243		#REF!	100						149.113591572648			0.817178155315615
		0.103216699190104		#DIV/0!	96.2962962962963			30			42.1158133388325			0.504805438622895
		0.198781007364609		#DIV/0!	98.1481481481482			15			114.761026220312			0.796344196983065
		0.778886790013674			94.4444444444444			45			671.073957811946			0.222631410661074
		0.351996323529595			98.1481481481482			15			221.705981170053			0.0545003157326938
		0.0706011329583298			92.5925925925926			60			46.0928051254989			0.598493156863793
		0.287711275027201			83.3333333333333			135			104.893426025536			0.79357323180923
		0.306013671522253			98.1481481481482			15			141.529986113316			0.259223318416171
					0			810			0
		0.215			96.2962962962963			30			58.8729190180127			0.515388652386529
		0.0995989246336774			68.5185185185185			255			43.2453538977269			0.980420519820378
		0.358333333333334			98.1481481481482			15			416.85446070423			0.41845311151851
		0.104363622134343			90.7407407407407			75			104.974461497196			0.369938954320261
		0.187097019101138			72.2222222222222			225			84.5184316913965			0.992472791103622
		1.0580410827592			90.7407407407407			75			794.591413991622			0.0447119524670441
		0.0718388506091666			98.1481481481482			15			44.1519926973373			0.529348599563459
		0.0600676123676941			87.037037037037			105			45.9588486502763			0.310662343704608
		0.415014677181527			98.1481481481482			15			124.050919195293			0.517994305826275
		0.108813999847598			68.5185185185185			255			53.1930876812572			0.952923764851928
		0.584863231875623			18.5185185185185			660			44.3356405842154			0.994393195742717
		0.0900316791992794			70.3703703703704			240			27.4143523209538			0.989288259528625
		0.256402461419977			85.1851851851852			120			84.2460275439284			0.993766745531346
		0.1548			79.6296296296296			165			98.3165730765344			0.994290934805583
		0.107347385417688			83.3333333333333			135			49.3962919486888			0.982453362285385
		0.0504887436134398			55.5555555555556			360			21.571955988936			0.174345060508379
		0.0790718011612309			62.962962962963			300			44.2501389418841			0.974320091325815
		0.13289031843853			94.4444444444444			45			92.158526855604			0.981132288621181
		0.0549433845899947			98.1481481481482			15			40.4779464242519			0.96348362272246
		0.0339944848468101			100						39.8601327462597			0.924618474622002
		0.0470120496521901			98.1481481481482			15			37.5217676695679			0.38972474728992
		0.0636316273225746			92.5925925925926			60			50.0409139231795			0.118834883473209
		0.0768014505717005			88.8888888888889			90			36.8312863920709			0.322910588115332
		0.124651323003213			25.9259259259259			600			23.1576530816974			0.224554544854223
		0.108678236936718			68.5185185185185			255			56.3340633270941			0.991031642746342
		0.0165084325322303			79.6296296296296			165			10.4003124953051			1
					0			810			0
		0.0452232161389717			85.1851851851852			120			21.2347787347095			0.99636418992499
		0.0318176948014676			42.5925925925926			465			10.4998392844843			1
		0.124923131005603			85.1851851851852			120			74.6717084580251			0.993686047502357
		0.0471826181416729			55.5555555555556			360			20.2941923724546			0.860478313090231
		0.0209900460039991			61.1111111111111			315			10.0752220819196			1
					0			810			0
		0.0775020185879936			90.7407407407407			75			51.8038592658555			0.0634869222655587
		0.0456875			88.8888888888889			90			33.5770985503476			0.384190432078487
		0.0534859356291521			53.7037037037037			375			22.3614403262746			0.981130147413076
		0.110741932032108			90.7407407407407			75			56.7071138437667			0.965135785514057
		0.20956477328809			88.8888888888889			90			24.9620330795871			0.868598313923155
					0			810			0
		0.0696843485131369			75.9259259259259			195			29.9990093023511			0.961540983537965
		0.036303514183913			87.037037037037			105			22.0057190374822			0.817549296972412
		0.0755432996595779			51.8518518518518			390			31.6481281943215			0.987764000242668
		0.083010703267631			37.037037037037			510			20.5956862028959			0.990338010938337
		0.0590978473005198			87.037037037037			105			31.4683988827303			0.37682821946833
		0.0864267055139143			92.5925925925926			60			43.511470399334			0.521363717462102
		0.0913750000000004			94.4444444444444			45			57.8113006905571			0.479231282232075
					0			810			0
		0.10297304977319			92.5925925925926			60			56.2356072094407			0.0834999586844973
		0.045327747638849			66.6666666666667			270			23.4886346561212			0.906598906090237
		0.0677626487983456			42.5925925925926			465			20.7203124953052			0.96650016078247
		0.0302722748567068			75.9259259259259			195			18.1633649140241			1
		0.0378340608576369			72.2222222222222			225			20.0883147610073			0.953024716633622
		0.0895496982491575			38.8888888888889			495			26.8649094747473			0.998613389254035
		0.0416360609811682			72.2222222222222			225			21.7364562179419			0.968834456922787
		0.339944848468101			53.7037037037037			375			67.5417960788204			0.320304743703645
		0.0182461622724652			72.2222222222222			225			10.4003124953051			1
		0.283785521516201			100						162.378913902818			0.154251982047576
		0.0427337435699959			77.7777777777778			180			33.6147217218734			0.995190758231023
		0.0197567567567566			70.3703703703704			240			10.9649999999999			1
		0.144162269682466			81.4814814814815			150			59.5299447998298			0.664470801168708
		0.0429255410696775			100						34.0876953601118			0.385930178209214
														Persistence
													0.0254254
