# Supplementary material for: MACF1 controls skeletal muscle function through the microtubule-dependent localization of extra-synaptic myonuclei and mitochondria biogenesis
Source: eLife. 2021 Aug 27;10:e70490. doi: 10.7554/eLife.70490 (PMC8500715; doi:10.7554/eLife.70490)
Supplement: Figure 3—figure supplement 1—source data 1. [file elife-70490-fig3-figsupp1-data1.xlsx]

## Sheet: 3A
MACF1 relative gene expression (normalized)	2M - MACF1 Cre-	2M - MACF1 Cre+	3M - MACF1 Cre-	3M - MACF1 Cre+	6M - MACF1 Cre-	6M - MACF1 Cre+	9M - MACF1 Cre-	9M - MACF1 Cre+	12M - MACF1 Cre-	12M - MACF1 Cre+
	1.15262	0.551692	1.09757	0.417002	0.926472	0.353531	1.08463	0.384669	0.972562	0.35391
	0.811392	0.587278	1.01671	0.357598	0.981526	0.357903	1.00565	0.283055	1.16526	0.252648
	1.03599	0.434298	0.885722	0.386219	1.092	0.333409	0.916599	0.413961	0.862176	0.284537
							0.874521
							1.1186

## Sheet: 3C
MACF1 mice weight	2M - MACF1 Cre-	2M - MACF1 Cre+	3M - MACF1 Cre-	3M - MACF1 Cre+	6M - MACF1 Cre-	6M - MACF1 Cre+	9M - MACF1 Cre-	9M - MACF1 Cre+	12M - MACF1 Cre-	12M - MACF1 Cre+
	23.3	22.35	20.32	22	29.34	31.7	31.3	30.7	40.8	39.3
	25.8	24.6	26	23.7	32.5	32	28	31	36.71	35.7
	23.2	22.5	24.45	23.9	33.9	30.6	31.6	33	44.7	36.9
	25.1		25.2	24.2	31.1		31.35	32.7	34.9	35.5
	28.4			26	32.4		30.62		36.8	40.8
					32.3				37.7	30.8
										32.63
										33.74
										42.91
										34.44
										41.28
										30.58

## Sheet: 3D
MACF1 mice TA weight	2M - MACF1 Cre-	2M - MACF1 Cre+	3M - MACF1 Cre-	3M - MACF1 Cre+	6M - MACF1 Cre-	6M - MACF1 Cre+	9M - MACF1 Cre-	9M - MACF1 Cre+	12M - MACF1 Cre-	12M - MACF1 Cre+
	37.6	34.5	43.79	48.94	48	52.15	56	54	62.44	46.28
	41.5	45	46.48	48.22	48.1	53.7	50	28	46.36	71.37
	48.2	42.5	45.37	49.39	51.9	51.7	50	60	58.53	97.72
	49		48.24	47.43	54.3		51.7	58.8	95.2	88.53
	47.3			44.3	60.3		52.7		74.5	84.45
					57.8				65.8	71.6
										56.89
										57.19
										54.7
										69.41
										44.1
										35.83

## Sheet: 3E
MACF1 mice G weight	2M - MACF1 Cre-	2M - MACF1 Cre+	3M - MACF1 Cre-	3M - MACF1 Cre+	6M - MACF1 Cre-	6M - MACF1 Cre+	9M - MACF1 Cre-	9M - MACF1 Cre+	12M - MACF1 Cre-	12M - MACF1 Cre+
	124.2	119.5	121.82	147.69	179.6	210	154	149	157.7	200
	151.4	134.7	163.82	151.19	186.5	178.1	136	179	222.23	207.2
	143.1	133.7	164.45	163.56	170.5	151.2	220	200	161	189.87
	140.8		153.8	163.74	188.3		191.2	185.27	173.83	209
	165			154.26	195.4		185.5		212	253.81
					162.4				224.5	201.4
									203.2	241.58
										201.43
										193.87
										184.94
										205.06
										198.01
										191.75
										167.35

## Sheet: 3F
mean distance between adjacent alpha-actinin sarcomers (um)	2M - MACF1 Cre-	2M - MACF1 Cre+	6M - MACF1 Cre-	6M - MACF1 Cre+	12M - MACF1 Cre-	12M - MACF1 Cre+
	1.83841	2.0116	1.88567	1.88567	1.88	2.03099
each value is the mean distance for sarcomeric length obtained from one myofiber, myofibers are obtained from 3 individual mouse per condition	1.78169	1.81644	1.6924	1.87649	2.12138	1.99436
	1.86298	1.70135	1.81477	1.96656	2.11724	1.84171
	1.84313	1.87621	1.89039	1.92466	1.89651	1.86648
	1.90929	1.89039	1.87622	1.70561	1.90551	1.85022
	1.90457	1.92465	1.85648	1.84785	1.9282	1.97157
	1.80433	2.03631	2.11073	1.91178	1.77791	1.77366
	1.87148	2.16315	2.00382	2.05757	1.96601	1.84786
	1.92521	2.0216	2.15859	1.7909	1.89387	2.06164

## Sheet: 3G-H
microtubules alignment score		M.13 2month old HO neg		degree	0	4	8	12	16	20	24	28	32	36	40	44	48	52	56	60	64	68	72	76	80	84	88	92	96	100	104	108	112	116	120	124	128	132	136	140	144	148	152	156	160	164	168	172	176
each point is one myofiber - myofibers from 3 individual mouse per condition		P.1		score	0.0317352	0.0298858	0.0271441	0.0259624	0.0239438	0.0225218	0.0224685	0.021121	0.0195292	0.0183536	0.0178419	0.0171035	0.0168389	0.0155167	0.0160659	0.0157274	0.0171005	0.0172034	0.0176701	0.0181864	0.0198096	0.0222355	0.0241813	0.024239	0.0226213	0.0208502	0.0197364	0.0199251	0.0204195	0.0210321	0.0208756	0.0202846	0.0197506	0.0209769	0.0212158	0.0218092	0.0223896	0.0237717	0.0252122	0.0263022	0.0265791	0.0284381	0.0307869	0.032009	0.0326286
		P.2			0.0312	0.0255624	0.0196573	0.0176007	0.0121632	0.0121113	0.013928	0.0164016	0.0135393	0.0120855	0.0102277	0.0117961	0.018236	0.019585	0.0259097	0.0219118	0.0253741	0.0382846	0.0565513	0.0753027	0.0776234	0.0600885	0.0408505	0.0290535	0.0210221	0.0236832	0.0195871	0.0143445	0.0101012	0.00772979	0.012793	0.013065	0.00955636	0.00908467	0.00692892	0.0057985	0.00642382	0.00936358	0.0110534	0.0115468	0.0137623	0.018566	0.0268613	0.0295615	0.0341226
		P.3			0.0706237	0.0749986	0.0626157	0.0507323	0.0373097	0.0294568	0.026982	0.0231886	0.0188225	0.0157503	0.0137147	0.0118212	0.0124091	0.011199	0.0143117	0.0145768	0.0145719	0.0128046	0.0158526	0.0214728	0.0271744	0.0286567	0.0240679	0.0173662	0.0117207	0.0101262	0.00986699	0.00912933	0.00742745	0.00737333	0.00822712	0.00887168	0.0083272	0.0102979	0.00999847	0.0102332	0.0109916	0.014242	0.0173207	0.0204481	0.0204658	0.0252701	0.0329385	0.0396124	0.0566316
		M.14 2month old HO neg
		P.1			0.0500312	0.0500288	0.0425169	0.0372549	0.0288963	0.0231056	0.0221131	0.0189947	0.0158407	0.0137656	0.0142048	0.01373	0.0137279	0.0110502	0.012616	0.0128035	0.0154369	0.0144589	0.0136878	0.0138026	0.0158924	0.021704	0.0286398	0.0316108	0.0291789	0.0226631	0.0174834	0.0151164	0.015597	0.0175348	0.017379	0.0148819	0.0133843	0.0161468	0.0162608	0.0172042	0.017401	0.0195192	0.0224468	0.0251499	0.0247208	0.0277145	0.0327097	0.0368035	0.0447906
		P.2			0.031805	0.0300111	0.0279058	0.0262805	0.0242644	0.0226147	0.0224371	0.0207089	0.019926	0.0189557	0.018456	0.0186591	0.0183586	0.0181232	0.0185266	0.0189139	0.0194282	0.0196762	0.020248	0.021795	0.0235735	0.0245918	0.0246604	0.0239151	0.0215767	0.0213133	0.0206521	0.0205201	0.0193159	0.0193529	0.0187638	0.0182725	0.0173243	0.0190852	0.0179928	0.0185173	0.0197308	0.0207626	0.0225982	0.0245016	0.0251773	0.0271163	0.0293335	0.0315715	0.0326866
		P.3			0.0479856	0.0422148	0.0349395	0.0314652	0.027374	0.0236102	0.0242318	0.0216771	0.0187278	0.017036	0.0166321	0.0159643	0.0156123	0.0144398	0.0149178	0.0142399	0.0153823	0.0146955	0.0143415	0.0143475	0.0142712	0.0142983	0.014438	0.0139951	0.0134602	0.0134204	0.0126356	0.0125267	0.0127047	0.0149667	0.0159165	0.0160508	0.0156446	0.0178563	0.0193867	0.0209366	0.0220154	0.0245494	0.0277674	0.0313305	0.0328919	0.0386544	0.0439	0.0468555	0.0496922
		M.19 2month old HO neg
		P.1			0.0414124	0.0355065	0.0278145	0.0250335	0.0205145	0.0175848	0.0184599	0.0170402	0.0154758	0.0144313	0.0146404	0.0146828	0.0153016	0.0136368	0.0145096	0.0140897	0.015968	0.0167515	0.0166813	0.0177719	0.0197767	0.0236608	0.030188	0.0335462	0.0327945	0.0279412	0.022873	0.0199489	0.0194459	0.0209576	0.0210855	0.0194004	0.0168499	0.0183358	0.0177827	0.0189141	0.0188499	0.0205754	0.0222316	0.0238239	0.0237712	0.0275185	0.0330865	0.0372637	0.0420712
		P.2			0.0398284	0.0361968	0.0292412	0.0260461	0.0205681	0.0181559	0.0187724	0.018097	0.0157813	0.0143943	0.0145646	0.0134479	0.0138703	0.012364	0.0162879	0.0173229	0.0189657	0.0182688	0.0205477	0.027474	0.0378711	0.0457611	0.0454262	0.0376898	0.0269607	0.0207441	0.020087	0.0194263	0.018176	0.01555	0.01494	0.0133282	0.0120787	0.0148211	0.0147283	0.0143653	0.0138289	0.0162992	0.0187874	0.0205203	0.0212225	0.024683	0.0304667	0.0330701	0.0389727
		P.3			0.0355977	0.0324243	0.0288245	0.0266625	0.0233992	0.0212153	0.0210713	0.0203339	0.0183524	0.0178201	0.0179043	0.0176052	0.0189997	0.0184064	0.0198082	0.0198207	0.0206784	0.0200034	0.0206217	0.0212718	0.0241798	0.0274631	0.0287325	0.0269416	0.0237621	0.0205297	0.0186418	0.0180079	0.0176944	0.0176735	0.0171027	0.0159881	0.0150433	0.0163463	0.0163023	0.0166868	0.0175544	0.018806	0.0208131	0.0231245	0.0242152	0.0276906	0.0328235	0.0358654	0.0371906
		P.4			0.0481862	0.0470368	0.0423175	0.0387817	0.0338935	0.0291093	0.0273953	0.0238843	0.0205096	0.0180857	0.0173277	0.016687	0.0159967	0.0143991	0.0149625	0.0144592	0.0154491	0.0145128	0.014531	0.0144806	0.0148852	0.0162838	0.0184981	0.0200994	0.0203725	0.0189814	0.0170007	0.0156553	0.0151167	0.0163041	0.0161287	0.0151059	0.0138031	0.0149407	0.0153433	0.0162542	0.016624	0.0185153	0.0213535	0.0243145	0.0251665	0.0294685	0.0343815	0.0382948	0.0451029
		P.5			0.047922	0.0481874	0.0438493	0.0402695	0.0350265	0.0303734	0.0289699	0.0251515	0.0213173	0.0184107	0.0175643	0.0165045	0.0158956	0.0145453	0.0155422	0.0155223	0.0165995	0.0154383	0.015606	0.0166133	0.018128	0.020242	0.0215947	0.0209514	0.0187038	0.0167792	0.0154874	0.0144631	0.0143198	0.0152178	0.0148837	0.0137031	0.012867	0.014115	0.0140947	0.0147665	0.0154115	0.0176566	0.0204764	0.0230398	0.0232658	0.027449	0.0326042	0.0367126	0.0437581
		M.15 2month old HO pos
		P.1			0.0530005	0.0506813	0.0446799	0.040459	0.0356029	0.0305612	0.0296342	0.0262707	0.0230075	0.02064	0.0193204	0.0178662	0.0167073	0.0146779	0.0143784	0.0140669	0.0149149	0.0127261	0.0118101	0.0111942	0.0112192	0.0116558	0.0117427	0.0119258	0.0115697	0.0113788	0.0109898	0.0107442	0.010926	0.0130467	0.0131904	0.0131789	0.0135788	0.01529	0.0167168	0.0178147	0.0187645	0.0212654	0.0240757	0.0277569	0.0289013	0.0346924	0.040594	0.0452672	0.0515146
		P.2			0.0354491	0.0332823	0.0291864	0.026974	0.0238142	0.0210019	0.0214754	0.0206348	0.0185302	0.0176165	0.0176821	0.0178902	0.0185699	0.0176346	0.0193538	0.0194842	0.0214698	0.0200323	0.0206791	0.0224718	0.0242802	0.024834	0.0244854	0.0232835	0.0215748	0.0211326	0.0207481	0.0198853	0.0195885	0.0199898	0.0191037	0.0178038	0.016857	0.0180627	0.017504	0.017098	0.0170376	0.0187975	0.0208873	0.0229229	0.0236823	0.0273588	0.0314545	0.0330201	0.0353752
		P.3			0.0420851	0.0406133	0.0363749	0.0324676	0.0278094	0.0232784	0.0216096	0.0204904	0.0181565	0.0170022	0.0159749	0.0153479	0.0156191	0.0142395	0.015648	0.0160642	0.0173164	0.0171775	0.0173102	0.018977	0.0219061	0.026323	0.0286929	0.0272854	0.0234576	0.0195401	0.0185944	0.0180578	0.0177078	0.0175094	0.0170418	0.0154277	0.0149657	0.0161641	0.0165998	0.0163784	0.0171972	0.0190758	0.021099	0.0230831	0.0240795	0.0278387	0.0326263	0.0357758	0.0400104
		M.16 2month old HO pos
		P.1			0.0432321	0.0392438	0.0332772	0.0307637	0.027643	0.0244091	0.0245497	0.0219415	0.0201976	0.0185563	0.017965	0.0175321	0.0169785	0.0157747	0.0160764	0.0154737	0.0160939	0.0155861	0.0158012	0.0165113	0.0167746	0.017425	0.018927	0.0194906	0.0193611	0.0186734	0.0182359	0.0179028	0.0176354	0.0179139	0.0176769	0.0167073	0.0158993	0.0170086	0.0172169	0.0175677	0.018257	0.0203877	0.0232392	0.0263331	0.0274153	0.031975	0.0362269	0.0402027	0.0439398
		P.2			0.0370356	0.0345234	0.0298857	0.0274576	0.0242683	0.0213625	0.0213416	0.0195499	0.0176901	0.0166016	0.0163964	0.0159791	0.0159985	0.0151545	0.0159205	0.0157674	0.0167582	0.0170022	0.017697	0.0186439	0.0199792	0.0211727	0.0236304	0.0252353	0.0265606	0.0262936	0.0245469	0.0223322	0.0206745	0.0202088	0.0200107	0.0190687	0.01771	0.0184762	0.01815	0.0185027	0.0190103	0.0204938	0.0228511	0.0251039	0.0251336	0.0281524	0.0314011	0.0336967	0.0365707
		P.3			0.0370012	0.035643	0.032651	0.0308677	0.0288069	0.0263339	0.0262095	0.02421	0.0220988	0.0205679	0.0197339	0.0189373	0.0186358	0.0172849	0.0173948	0.0170537	0.0177848	0.0165261	0.0163783	0.016325	0.0165869	0.0167917	0.0169343	0.0170378	0.0170553	0.0169933	0.0170024	0.0170023	0.0172315	0.0184802	0.018168	0.0180046	0.0179595	0.0193457	0.0198283	0.0205587	0.0209878	0.0225773	0.0248953	0.0270754	0.0273337	0.0296654	0.0318967	0.0337858	0.0363576
		M.17 2month old HO pos
		P.1			0.0381378	0.0362551	0.0318961	0.0294106	0.0259745	0.0226665	0.0222782	0.020479	0.0189435	0.0181515	0.0181676	0.0179318	0.0183542	0.017341	0.0186672	0.018468	0.0193653	0.0186305	0.0188786	0.0196508	0.0216714	0.0233092	0.0238829	0.0227863	0.0205602	0.0194834	0.0190333	0.0189894	0.018652	0.0188906	0.0189631	0.0180185	0.0169048	0.0177386	0.01724	0.0173234	0.01785	0.0197215	0.022298	0.0246006	0.024726	0.0277258	0.0305398	0.0326744	0.0367687
		P.2			0.0361899	0.0350582	0.0318737	0.0298877	0.0268683	0.0239475	0.023385	0.0216515	0.0196475	0.0181362	0.0175268	0.01701	0.0167871	0.015377	0.0157842	0.0151519	0.0159997	0.0157329	0.016222	0.0168576	0.0175868	0.018273	0.0202524	0.0218	0.0227877	0.0224269	0.0213951	0.0205577	0.0200313	0.0204614	0.0205402	0.0198966	0.0190612	0.0199937	0.0197985	0.0204199	0.02119	0.0223167	0.024186	0.0255884	0.0258414	0.0280804	0.0306967	0.0325103	0.0352132
		P.3			0.0425708	0.0405818	0.036408	0.0333192	0.0284656	0.0247875	0.023745	0.0216618	0.0190698	0.0177027	0.0170103	0.0163632	0.0166916	0.0158628	0.0174706	0.0168522	0.0174735	0.0175667	0.0196014	0.0230805	0.0267012	0.0284937	0.0274442	0.0243378	0.0199103	0.017612	0.0166954	0.0161044	0.0155261	0.0150929	0.014615	0.0138391	0.0131508	0.0146774	0.014557	0.015105	0.0158227	0.0178067	0.0206392	0.0232158	0.0243237	0.0277047	0.0326724	0.0363008	0.0413668
		M.63 6month old HO neg
		P.1			0.0407516	0.0378073	0.0312788	0.027918	0.0233763	0.0204464	0.0204286	0.0194622	0.0180094	0.0170116	0.0169969	0.0163677	0.0158464	0.0146119	0.0164929	0.0167578	0.0180628	0.0182077	0.0184559	0.0204595	0.0251912	0.0309343	0.0338554	0.0318167	0.0262406	0.0211148	0.0184218	0.0177348	0.0176766	0.017302	0.0171845	0.0164929	0.0157974	0.0175862	0.0178937	0.0178736	0.0174523	0.0185227	0.0199565	0.0212651	0.0220384	0.0256864	0.0304052	0.0337788	0.0390281
		P.2			0.0295617	0.0270952	0.0233083	0.0218095	0.0192068	0.0171675	0.0175182	0.0170215	0.0155591	0.0147297	0.0147824	0.0150398	0.0158195	0.0145608	0.0161915	0.0161725	0.0184394	0.0200787	0.0212786	0.0227102	0.0254297	0.0299266	0.0353088	0.0373906	0.0346366	0.0294609	0.0254015	0.0233775	0.0224535	0.02178	0.021063	0.0190713	0.0172294	0.018423	0.0181616	0.018553	0.0188893	0.0202964	0.022234	0.0232198	0.0235142	0.0259949	0.0289803	0.0301766	0.030977
		P.3			0.0397739	0.0377258	0.0333274	0.0302788	0.0262174	0.0227981	0.0215056	0.0196761	0.0174959	0.0161302	0.0154546	0.0152628	0.0156193	0.0145925	0.0157334	0.0155886	0.0172388	0.017865	0.0192206	0.0215686	0.0243956	0.0259146	0.0265048	0.0253207	0.0232451	0.0214037	0.0199071	0.0189242	0.0180438	0.0175868	0.017562	0.0169319	0.0159091	0.0168552	0.0164766	0.016808	0.0180082	0.0196781	0.0221435	0.0238964	0.0252043	0.0287345	0.0326081	0.0357203	0.0391437
		M.64 6month old HO neg
		P.1			0.04397	0.0430363	0.0390003	0.0356919	0.0311389	0.0271344	0.0255692	0.0230299	0.0201798	0.0183666	0.017471	0.0167907	0.0166896	0.0156998	0.0164753	0.0161991	0.0173951	0.0171787	0.0182149	0.0190399	0.0199066	0.0202353	0.0199727	0.0192591	0.0177955	0.0168851	0.0162488	0.0157787	0.0155996	0.0162369	0.0161645	0.0158093	0.0154287	0.0165204	0.016632	0.0171411	0.0177265	0.0192385	0.0216369	0.0239084	0.0249948	0.0286198	0.0326926	0.0359409	0.0413558
		P.2			0.0328856	0.0341598	0.0329744	0.0322117	0.0278928	0.0234358	0.0225856	0.021855	0.0198834	0.0184665	0.0184568	0.0189913	0.0201722	0.0182329	0.0198489	0.0193072	0.0219346	0.023599	0.0250443	0.0270087	0.0298763	0.0368022	0.0437815	0.0447697	0.0384227	0.0292953	0.0226047	0.0192297	0.0174839	0.0162919	0.0158788	0.012854	0.0101807	0.0118321	0.0102163	0.00919595	0.00902623	0.0099882	0.0119171	0.013276	0.01389	0.0175353	0.0218768	0.0248303	0.0299978
		P.3			0.0435272	0.0432694	0.0392688	0.0357897	0.0304139	0.0260512	0.0243579	0.0220534	0.0190691	0.0171203	0.0165163	0.0160357	0.0158147	0.0141618	0.0149999	0.0144648	0.0159809	0.0163463	0.0169009	0.0180686	0.0203152	0.0245464	0.0288308	0.0300421	0.0264492	0.0214776	0.0178377	0.016034	0.0154933	0.0152509	0.015076	0.0139701	0.0127595	0.0143845	0.0147505	0.0155961	0.016275	0.0179943	0.0204706	0.0225025	0.023616	0.0273382	0.0322101	0.0355551	0.0410133
		M.66 6month old HO neg
		P.1			0.0356843	0.035208	0.0320501	0.0292972	0.0254126	0.0227838	0.0221078	0.0207149	0.0187571	0.0175513	0.0170218	0.01632	0.0159875	0.014546	0.0155161	0.0154698	0.0167806	0.0172292	0.0174003	0.0175085	0.0183261	0.0210284	0.025919	0.0306436	0.033132	0.0309417	0.0262602	0.0222086	0.0195779	0.0189592	0.0199719	0.0197473	0.0182411	0.018653	0.0176404	0.0176266	0.0181926	0.0190968	0.021053	0.0223442	0.0223324	0.0243208	0.027277	0.0296976	0.0334616
		P.2			0.0404515	0.0379057	0.0327586	0.0293906	0.0249174	0.0221835	0.0218835	0.020115	0.0175132	0.0158245	0.014819	0.0139261	0.0139611	0.0127065	0.0146388	0.0147476	0.0159918	0.0158786	0.0163331	0.0181436	0.0220807	0.0281357	0.0337832	0.0352389	0.0319301	0.0262553	0.0216329	0.0190024	0.0178925	0.0178817	0.0180569	0.0167949	0.0147983	0.0158497	0.015284	0.0162819	0.0173467	0.0189226	0.0214289	0.0231053	0.0233789	0.0262229	0.0309599	0.0344754	0.0391703
		P.3			0.0355412	0.035132	0.0328976	0.0307455	0.0280507	0.0259422	0.025289	0.0236265	0.0213943	0.0202037	0.0194649	0.0191068	0.019523	0.0186319	0.0191264	0.0184592	0.0185695	0.0177227	0.017665	0.018495	0.0206724	0.0229434	0.0239985	0.0231573	0.0207571	0.0185475	0.0171071	0.0168196	0.0171215	0.0177269	0.0182073	0.0179926	0.0172766	0.0185059	0.0183639	0.0191488	0.0198516	0.0208154	0.0222349	0.023034	0.0229738	0.0248899	0.027907	0.0304805	0.0338795
		M.61 6month old HO pos
		P.1			0.0372598	0.0363469	0.032998	0.0305308	0.0268157	0.0246921	0.0242611	0.0230501	0.0208316	0.0194026	0.0183181	0.0178473	0.0187924	0.018301	0.0196476	0.0189618	0.0197809	0.0210545	0.024189	0.0281032	0.0306112	0.0292254	0.0257383	0.0222971	0.0189629	0.0180304	0.0173382	0.0163751	0.0153024	0.0147445	0.0152695	0.0151362	0.0143913	0.0154538	0.0153689	0.0157449	0.0162531	0.0180507	0.0200664	0.0218365	0.0225583	0.0249478	0.0285684	0.0310882	0.0354557
		P.2			0.0358465	0.0350711	0.0318985	0.0297517	0.0263713	0.0238644	0.0232417	0.0218627	0.0201345	0.018849	0.0183485	0.0179053	0.0176675	0.0161757	0.0166656	0.0162591	0.0173662	0.0176676	0.0179307	0.0178933	0.0189117	0.0218725	0.025629	0.0275993	0.0267836	0.0236119	0.0204763	0.0190936	0.0187254	0.0189619	0.0189233	0.0181544	0.0170843	0.0183731	0.0184445	0.0189908	0.0192069	0.0201614	0.021751	0.0228152	0.0232279	0.025751	0.029124	0.0312051	0.034351
		P.3			0.0456469	0.0419805	0.0359153	0.0328211	0.0276351	0.0234009	0.0219753	0.0198053	0.0170944	0.0156855	0.0154427	0.0151086	0.0149033	0.0135165	0.0145057	0.0147306	0.0163748	0.016413	0.0164864	0.0173866	0.0198372	0.0237524	0.0275476	0.0281835	0.0257978	0.0219822	0.0189348	0.0175819	0.0169692	0.0170412	0.0168814	0.0158179	0.0146543	0.0162003	0.0162524	0.016796	0.0170625	0.0186145	0.0212922	0.0231605	0.024115	0.028321	0.0340383	0.0380703	0.0442672
		P.4			0.0428389	0.0426178	0.0384327	0.0351429	0.0303067	0.0264267	0.0249082	0.0226568	0.0201023	0.0181901	0.0175484	0.0170064	0.0165854	0.0149658	0.0153394	0.0143928	0.0153992	0.0157123	0.0162009	0.0163369	0.0165754	0.0180327	0.0219658	0.025438	0.027221	0.0254154	0.021695	0.0186483	0.0168986	0.0168007	0.0170617	0.0161355	0.0146907	0.0158038	0.0155036	0.0162284	0.0172902	0.018868	0.0211022	0.0226233	0.0232771	0.0263101	0.0310015	0.0345215	0.0397812
		M.62 6month old HO pos
		P.1			0.0457692	0.0463792	0.0418285	0.0375586	0.0324969	0.0283711	0.0266922	0.0243103	0.0214017	0.0191969	0.0179294	0.0171036	0.0167238	0.0155579	0.0154512	0.0144932	0.0147511	0.0139123	0.0137359	0.0136184	0.0141837	0.0142101	0.0143403	0.0156315	0.0165438	0.0177578	0.0178655	0.0172225	0.0163116	0.0171796	0.0171503	0.017234	0.0171261	0.017918	0.0180737	0.0188155	0.0195826	0.0211276	0.0231655	0.0249954	0.0261776	0.0290237	0.0330081	0.03632	0.0417541
		P.2			0.0310956	0.0303216	0.0281922	0.026557	0.0244004	0.0221984	0.0224958	0.0212781	0.019817	0.0187862	0.0185781	0.0181366	0.0180172	0.016953	0.0171984	0.016762	0.0175058	0.0165571	0.0165763	0.0171162	0.0178481	0.0182407	0.0190633	0.0192803	0.0198254	0.0203341	0.0209132	0.0212385	0.0211772	0.0218892	0.0217805	0.0216587	0.0215156	0.0224997	0.0224345	0.0227745	0.0230454	0.0240009	0.0258485	0.0272726	0.0275021	0.0289611	0.0303557	0.0308267	0.0311705
		P.3			0.0408969	0.0377021	0.0319009	0.0287748	0.0244791	0.0209171	0.0210537	0.019074	0.0170246	0.0155181	0.0155432	0.0150636	0.0150509	0.0138539	0.0155299	0.0156426	0.0170126	0.0167919	0.0172553	0.0190382	0.0214422	0.0248323	0.0267817	0.0254985	0.0216889	0.0178894	0.0158277	0.0148634	0.0146715	0.0154437	0.0158857	0.0154545	0.0154076	0.0178023	0.0188219	0.020063	0.0208465	0.0230322	0.0265815	0.0295941	0.0295542	0.0328873	0.0366331	0.0389004	0.0414727
		M.67 6month old HO pos
		P.1			0.0354511	0.0336495	0.029854	0.0271975	0.0232639	0.0205404	0.0198689	0.0188793	0.0168801	0.0156746	0.0149692	0.0144896	0.0146774	0.0137971	0.015591	0.0154226	0.016351	0.0165584	0.0182896	0.0217427	0.0257382	0.0277502	0.0272839	0.0248061	0.0219794	0.0204745	0.0200585	0.0196734	0.0192242	0.0194596	0.019886	0.0196867	0.0195749	0.0212003	0.0210296	0.0210514	0.0213772	0.0227661	0.0244079	0.0251879	0.0257812	0.0282374	0.0314276	0.0331952	0.0355945
		P.2			0.0397702	0.0379703	0.0342629	0.0324163	0.0293612	0.0266398	0.0260692	0.0246309	0.0228728	0.0213102	0.0202292	0.0192569	0.0188749	0.0178691	0.017858	0.0172948	0.0175211	0.0167658	0.0170285	0.0176904	0.0186051	0.0194135	0.0198493	0.0190919	0.0178081	0.0167679	0.0159931	0.0157281	0.015601	0.016063	0.0160954	0.015877	0.0156081	0.0167506	0.0175341	0.018573	0.019821	0.0215294	0.0236698	0.0251579	0.0257508	0.0286162	0.0318058	0.034279	0.0383184
		P.3			0.0318966	0.0299761	0.0260486	0.0239832	0.0200527	0.0182617	0.0186685	0.0185039	0.0172844	0.0164377	0.0168527	0.0166663	0.0171325	0.0153638	0.0170763	0.0172564	0.0195072	0.0200944	0.0202174	0.0220571	0.0260811	0.032704	0.0393577	0.0403196	0.0354072	0.0284369	0.0233841	0.0210976	0.020551	0.0202065	0.0197898	0.0177571	0.0153492	0.0171516	0.0171519	0.0179221	0.0180072	0.0188168	0.0201567	0.0207911	0.0205296	0.0220254	0.0253624	0.0272811	0.0310249
		P.4			0.0405229	0.0362213	0.0307649	0.0277738	0.0245114	0.021874	0.0222862	0.0203216	0.0178398	0.0160137	0.0147733	0.0142523	0.014113	0.0125508	0.0138859	0.0135731	0.0155687	0.0157257	0.0175979	0.0208531	0.0244498	0.0266567	0.0276362	0.0254336	0.0211368	0.0191868	0.0177323	0.0163516	0.0158232	0.016147	0.0165391	0.0157919	0.0157011	0.0177954	0.0183529	0.018615	0.0194083	0.0213335	0.0238865	0.0263987	0.0276173	0.0326535	0.0383103	0.0424272	0.0435919

## Sheet: 3I
percentage of myonnuclei with complete stable microtubules staining		2M - MACF1 Cre-	2M - MACF1 Cre+	6M - MACF1 Cre-	6M - MACF1 Cre+	12M - MACF1 Cre-	12M - MACF1 Cre+
		100	100	60	47	100	85
		66	69	66	57	100	72
		77	100	75	100	100	28
each point is one myofiber - myofibers from 3 individual mouse per condition		81	100	50	100	75	60
		78	66	64	86	100	35
		60	40	85	77	100	45
		50	66	80	40	80	88
		66	75	100	37	85	25
		66	100	90	60	100	46
		50	87	73	85	100	52
		66	100	83	100	75	57
		100		69	100	100	37
		85		100	50	85
				100		80
						71
