# Supplementary material for: MACF1 controls skeletal muscle function through the microtubule-dependent localization of extra-synaptic myonuclei and mitochondria biogenesis
Source: eLife. 2021 Aug 27;10:e70490. doi: 10.7554/eLife.70490 (PMC8500715; doi:10.7554/eLife.70490)
Supplement: Figure 3—source data 1. [file elife-70490-fig3-data1.xlsx]

## Sheet: 3C
MACF1 relative gene expression level (normalized)	MACF1 Cre-	MACF1 Cre+
	0.972562	0.35391
	1.16526	0.252648
	0.862176	0.284537

## Sheet: 3E
mean distance between adjacent alpha-actinin sarcomers (um)	MACF1 Cre-	MACF1 Cre+
	1.88	2.03099
each value is the mean distance for sarcomeric length obtained from one myofiber, myofibers are obtained from 3 individual mouse per condition	2.12138	1.99436
	2.11724	1.84171
	1.89651	1.86648
	1.90551	1.85022
	1.9282	1.97157
	1.77791	1.77366
	1.96601	1.84786
	1.89387	2.06164

## Sheet: 3F
microtubules alignment score			degree	0	4	8	12	16	20	24	28	32	36	40	44	48	52	56	60	64	68	72	76	80	84	88	92	96	100	104	108	112	116	120	124	128	132	136	140	144	148	152	156	160	164	168	172	176
	M.7e 12month old HO neg
each point is one myofiber - myofibers from 3 individual mouse per condition	P.1		score	0.0271235	0.0268853	0.0238555	0.0221868	0.0186834	0.0171612	0.0172717	0.0170526	0.0161828	0.0156908	0.0160698	0.0158846	0.0169218	0.0157711	0.0180981	0.018461	0.0209742	0.0232172	0.0242692	0.0263227	0.0306996	0.0379632	0.0451223	0.0464354	0.041144	0.0334353	0.0273431	0.0241993	0.0227997	0.0210723	0.0206573	0.0182767	0.0157144	0.0168936	0.0162273	0.0164573	0.016202	0.0164888	0.0169433	0.0169275	0.0164364	0.0174311	0.0202732	0.0216137	0.0251601
	P.2			0.0246609	0.0255037	0.0243045	0.0236023	0.0200668	0.0180863	0.0176817	0.0171059	0.0157463	0.0144602	0.0149267	0.0151891	0.0160712	0.0143728	0.0171343	0.017593	0.0207171	0.0228177	0.0235877	0.025512	0.0307344	0.0398414	0.0485793	0.0498336	0.0432468	0.0340067	0.0278572	0.0255675	0.0247791	0.0227044	0.0220127	0.0192037	0.0163387	0.0179203	0.0169589	0.0166304	0.0155935	0.0159885	0.0164015	0.0154852	0.0146491	0.0155683	0.0186746	0.0195664	0.022718
	P.3			0.0425003	0.0374742	0.0308211	0.0276352	0.0230585	0.020183	0.0200133	0.0188569	0.017063	0.0159687	0.0154427	0.0147931	0.0154295	0.0147544	0.0168906	0.0169629	0.0177249	0.0178086	0.0196788	0.0239411	0.0299205	0.0330069	0.0307495	0.0251473	0.0195429	0.017106	0.0168102	0.0167902	0.0159454	0.0151545	0.0154007	0.0151678	0.0148417	0.0166797	0.0166404	0.0169036	0.0173335	0.0193931	0.0218011	0.0241116	0.0255933	0.0300927	0.0356306	0.0392924	0.0439434
	P.4			0.0427016	0.0382125	0.0308028	0.027517	0.02176	0.0185289	0.0181926	0.0173101	0.0152816	0.0139983	0.0137976	0.0128429	0.0131257	0.0118972	0.0158151	0.0169936	0.0183151	0.0185681	0.0208782	0.0273093	0.0382447	0.0473794	0.0461644	0.0369065	0.0260294	0.0202241	0.0189948	0.0186852	0.0173914	0.0145849	0.0144451	0.0136602	0.0125328	0.0145464	0.0141348	0.0136646	0.0133439	0.0153546	0.0178236	0.0195448	0.0205336	0.0245245	0.0306424	0.034941	0.0418547
	M.15 12month old HO neg
	P.1			0.0414999	0.0404055	0.0363488	0.0333095	0.0298667	0.0266436	0.0258393	0.0239561	0.0217104	0.0200124	0.0188254	0.0179178	0.0172649	0.0157269	0.0160613	0.0154205	0.0161354	0.015081	0.0154905	0.0159068	0.0169045	0.0177756	0.0184156	0.0184001	0.0176199	0.01691	0.0163382	0.0161656	0.0161779	0.0169093	0.0167987	0.0167884	0.016946	0.0183932	0.0190276	0.0200108	0.0206208	0.022423	0.0243262	0.0261571	0.0266089	0.0296524	0.0328792	0.0351503	0.0391777
	P.2			0.0484333	0.0446702	0.0382911	0.034203	0.029187	0.025156	0.0232478	0.0207347	0.0176901	0.0158558	0.014658	0.0137427	0.0133849	0.0119631	0.0125298	0.0118599	0.0127658	0.0125501	0.0135336	0.015227	0.017571	0.0197712	0.0211694	0.0205014	0.0186435	0.0171218	0.0161494	0.0153484	0.0146674	0.014677	0.0146423	0.0144499	0.0141115	0.01579	0.0163086	0.0174012	0.0189509	0.0214148	0.0253327	0.0287347	0.0318543	0.0369762	0.042849	0.0463975	0.0494819
	P.3			0.0381003	0.0356095	0.0314046	0.0289831	0.0251694	0.0227431	0.0220704	0.0207217	0.0187016	0.0172737	0.0165322	0.0156079	0.0154621	0.0139256	0.0151863	0.0151553	0.0166134	0.0168791	0.0173296	0.0191633	0.0233105	0.0285622	0.0328536	0.032174	0.027602	0.0231505	0.0203459	0.0189915	0.0187856	0.0182427	0.0178418	0.0167133	0.0156489	0.0172219	0.0171788	0.017574	0.0178471	0.019202	0.0212256	0.0226378	0.0236677	0.0264059	0.0304673	0.0328628	0.0368542
	P.4			0.0369493	0.035484	0.0318473	0.0296261	0.0265873	0.024098	0.0237861	0.0221934	0.0204195	0.0190617	0.0182865	0.0173927	0.0176005	0.0166778	0.0175478	0.0170973	0.0179257	0.0174303	0.0184297	0.0201293	0.022017	0.0227036	0.0220277	0.0206057	0.0189331	0.0181531	0.0177154	0.0173802	0.0171751	0.0179744	0.018056	0.0178872	0.0177114	0.0190178	0.0190311	0.0194787	0.0199298	0.0215645	0.0237483	0.0255824	0.0259597	0.0284576	0.0311424	0.0331202	0.0360574
	M.25 12month old HO neg
	P.1			0.0273349	0.026732	0.0240503	0.0227437	0.019092	0.0178542	0.0181829	0.0189272	0.0178844	0.0174656	0.0174719	0.0166434	0.0176391	0.016819	0.0208286	0.0215615	0.0226269	0.0241328	0.0281	0.0359047	0.0455878	0.0495117	0.0439152	0.0342295	0.0253598	0.0229014	0.022526	0.0214122	0.0190719	0.0161945	0.0170921	0.0169456	0.0154829	0.0164938	0.0145866	0.0136835	0.0139363	0.0153515	0.0166822	0.0172145	0.0176912	0.0197337	0.0226416	0.0233975	0.0263623
	P.2			0.0387541	0.0371175	0.0331836	0.0301685	0.0262616	0.0235056	0.022421	0.0210805	0.0194829	0.0183639	0.0177968	0.0173468	0.0173584	0.0163021	0.0166361	0.0161299	0.017249	0.0177332	0.018127	0.018655	0.0200181	0.0222892	0.024967	0.0257517	0.0241284	0.0216336	0.0195601	0.0185049	0.0180554	0.0176297	0.0176295	0.0171661	0.0165304	0.0176218	0.0177428	0.0183091	0.0188413	0.0201006	0.0218413	0.0232951	0.0245848	0.0274108	0.0310713	0.0339088	0.0377346
	P.3			0.042834	0.0400906	0.0347144	0.0320157	0.0277806	0.0243647	0.0236992	0.0219891	0.0199432	0.0182702	0.0174712	0.0170558	0.0170926	0.0154335	0.0164144	0.0161194	0.0174445	0.0172149	0.0174226	0.0179344	0.019667	0.0224838	0.0245644	0.0244442	0.0215088	0.0189118	0.0177152	0.0173883	0.0172561	0.0171824	0.0168617	0.0160772	0.0152719	0.0168545	0.0169068	0.017385	0.0179258	0.0194555	0.0215067	0.0232309	0.0239011	0.0275792	0.032388	0.0363979	0.0418305
	P.4			0.0336981	0.0314846	0.0287022	0.0273179	0.0245002	0.0225447	0.0219962	0.0213385	0.0201239	0.0193616	0.019398	0.0189999	0.0189361	0.0178801	0.0189465	0.0188468	0.0201827	0.0200007	0.0200862	0.0210598	0.0235592	0.0264379	0.0271008	0.025001	0.0212201	0.0185302	0.0179051	0.0179607	0.0178632	0.0176627	0.0176619	0.0174607	0.0172056	0.0184702	0.0184188	0.0185877	0.0186346	0.0199324	0.0219007	0.0236237	0.0245901	0.0272808	0.0306985	0.0325241	0.0343646
	M.13 12month old HO pos
	P.1			0.0586564	0.0555171	0.0477762	0.0413001	0.0331718	0.0265933	0.0258468	0.0216276	0.0172332	0.013805	0.012759	0.0112054	0.0106138	0.00881149	0.0100662	0.0100997	0.0113037	0.00885532	0.00832712	0.00908947	0.0100062	0.0107801	0.0112283	0.0109744	0.0103203	0.0100427	0.00996482	0.0102744	0.0111149	0.0138102	0.0140854	0.0141987	0.014759	0.016787	0.018081	0.0199272	0.0206629	0.0239788	0.028963	0.0343932	0.0362731	0.043529	0.0503405	0.0543993	0.0584469
	P.2			0.0422528	0.0380682	0.032601	0.0300838	0.0261463	0.0231952	0.0233456	0.0212526	0.0186529	0.0168524	0.0166837	0.0159392	0.0159306	0.014781	0.0161295	0.0159957	0.0171281	0.0172032	0.0184655	0.0208939	0.0241389	0.0266289	0.0261911	0.0232461	0.0182558	0.015622	0.0143668	0.0139662	0.0137948	0.0141809	0.0146406	0.0146381	0.0150033	0.0170733	0.0179122	0.0186441	0.0195223	0.021955	0.0245782	0.0270908	0.0276399	0.0315025	0.0358828	0.0387573	0.0431669
	P.3			0.0350344	0.0351547	0.0338492	0.0328379	0.0307699	0.0285259	0.0279102	0.0264627	0.0243277	0.0227097	0.021398	0.0203969	0.0198088	0.0186826	0.0186253	0.0176532	0.0175727	0.0165511	0.0168643	0.0171967	0.0173503	0.0168256	0.0168655	0.0171552	0.0173751	0.0175404	0.0172836	0.0166531	0.0159607	0.0167191	0.0169701	0.0167818	0.0167903	0.0178529	0.0182376	0.0190022	0.0200845	0.0216184	0.0235553	0.0252357	0.025932	0.0285019	0.030819	0.032404	0.0341536
	M.5 12month old HO pos
	P.1			0.0416378	0.0423536	0.0408921	0.0387368	0.0352182	0.0323854	0.0310279	0.0288933	0.0262872	0.0246241	0.0230105	0.0217281	0.0214279	0.0200202	0.0198314	0.0193557	0.0208546	0.0212365	0.0220191	0.0218344	0.020578	0.0189011	0.0168495	0.0157104	0.01395	0.0134042	0.0125295	0.0117621	0.011531	0.0122207	0.0124806	0.0123378	0.0119619	0.0129527	0.0130039	0.0136342	0.0144946	0.0162738	0.0187583	0.0210307	0.0224921	0.0263205	0.0306716	0.0339366	0.0388396
	P.2			0.040477	0.038485	0.0340322	0.0312828	0.0264821	0.0236791	0.0236414	0.022289	0.0203813	0.0186579	0.0183206	0.0176315	0.017135	0.0151336	0.0154723	0.0148352	0.0165473	0.0169024	0.0168387	0.0173662	0.0192284	0.0232337	0.028748	0.0311487	0.0285135	0.0227508	0.0183421	0.0165431	0.0168495	0.0175945	0.0175565	0.0156176	0.0143314	0.0161694	0.0167901	0.017542	0.0173312	0.0186397	0.0209306	0.0227679	0.0234676	0.0265802	0.030875	0.0338146	0.039043
	P.3			0.035188	0.0335666	0.0287906	0.0262465	0.0221336	0.0200113	0.0197208	0.0192103	0.0178407	0.0165881	0.0166	0.016703	0.0170282	0.0151487	0.015876	0.0149016	0.0164334	0.0180188	0.0187256	0.0190818	0.0207287	0.0251681	0.0327258	0.0382614	0.0372533	0.0313952	0.0246128	0.0203832	0.0187365	0.0187421	0.019615	0.0187068	0.0164813	0.0176393	0.0171375	0.017826	0.0182105	0.0192974	0.0211533	0.0214603	0.0216387	0.0236901	0.0276805	0.0299103	0.0337327
	P.4			0.0451264	0.0427723	0.0372539	0.0338688	0.0292506	0.0250213	0.0238677	0.0212792	0.01847	0.0161349	0.0148509	0.0136636	0.0134409	0.0120955	0.0132466	0.0132111	0.0143791	0.0139132	0.0147067	0.0167348	0.0198038	0.0226426	0.0238596	0.0223844	0.0193821	0.0173999	0.0167742	0.01634	0.0162449	0.0170356	0.0173459	0.0170936	0.0167726	0.0183089	0.0184219	0.0192081	0.0199984	0.0221204	0.0251331	0.0275219	0.0276176	0.030609	0.0342877	0.0374151	0.0429912
	M.14 12month old HO pos
	P.1			0.0693543	0.0616044	0.0494579	0.0427106	0.035065	0.0284553	0.0268152	0.0233749	0.0204627	0.0177744	0.0165289	0.0148238	0.0130101	0.0112456	0.0111681	0.0105277	0.0104147	0.00785857	0.00725372	0.00708008	0.00699485	0.00693078	0.00709957	0.00707834	0.00702404	0.0070633	0.0070231	0.00730124	0.00789312	0.0106294	0.0109257	0.0113195	0.0119796	0.0139614	0.0159182	0.0174028	0.0189322	0.0218858	0.0257991	0.0301065	0.0336119	0.0425769	0.0531638	0.062064	0.0703291
	P.2			0.0456272	0.04098	0.0342225	0.0312458	0.0273135	0.0235289	0.0232001	0.0203341	0.017614	0.0157312	0.0154402	0.0148323	0.0141416	0.0128838	0.0136193	0.0134744	0.0142573	0.0134976	0.0140193	0.0148289	0.0159821	0.0169536	0.0178202	0.017731	0.0173275	0.0169165	0.0164633	0.0163681	0.0163329	0.0177241	0.0175014	0.0170129	0.0168484	0.0182207	0.0190145	0.0201687	0.0211193	0.0235361	0.0267932	0.0299803	0.0312284	0.0357635	0.0409691	0.0443355	0.0470962
	P.3			0.0671646	0.0657813	0.0589298	0.0519947	0.0414659	0.0318225	0.0297903	0.0250402	0.0207179	0.0173599	0.0158779	0.0146395	0.0129821	0.0100621	0.0100029	0.00961785	0.0103325	0.00843656	0.007899	0.00768819	0.00865233	0.00984951	0.011993	0.0129145	0.0123965	0.0106359	0.00838614	0.00811492	0.00861572	0.010726	0.0107719	0.0103948	0.0103036	0.0132691	0.0141117	0.0150365	0.0154654	0.0185069	0.0222521	0.0266358	0.02754	0.0353435	0.0445707	0.0527612	0.0631468
	P.4			0.04583	0.0437433	0.038017	0.0338798	0.0296544	0.0261429	0.0259744	0.0238265	0.0218778	0.0201316	0.0193881	0.0186931	0.0181133	0.0164627	0.0165145	0.0160759	0.0164814	0.014838	0.0144284	0.0148486	0.0160376	0.0171135	0.0175473	0.0170844	0.0155378	0.0143789	0.0136019	0.0133407	0.0132863	0.0145336	0.0148633	0.0148323	0.0150693	0.0169204	0.0180898	0.0194238	0.020411	0.0225052	0.0251051	0.027795	0.0282667	0.031807	0.0355321	0.0384161	0.0435796

## Sheet: 3H
percentage of myonnuclei with complete stable microtubules staining	MACF1 Cre-	MACF1 Cre+
	75	85
	100	72
	100	28
each point is one myofiber - myofibers from 3 individual mouse per condition	80	60
	85	35
	100	45
	100	88
	75	25
	100	46
	85	52
	80	57
	71	37
