# Supplementary material for: MACF1 controls skeletal muscle function through the microtubule-dependent localization of extra-synaptic myonuclei and mitochondria biogenesis
Source: eLife. 2021 Aug 27;10:e70490. doi: 10.7554/eLife.70490 (PMC8500715; doi:10.7554/eLife.70490)
Supplement: Figure 4—figure supplement 1—source data 1. [file elife-70490-fig4-figsupp1-data1.xlsx]

## Sheet: 4B
percentage of myonuclei delocalization		Tibialis Anterior								Soleus								Gastrocnemius
	Genotype	Macf1 Cre-	Macf1 Cre+	Macf1 Cre-	Macf1 Cre+	Macf1 Cre-	Macf1 Cre+		Genotype	Macf1 Cre-	Macf1 Cre+	Macf1 Cre-	Macf1 Cre+	Macf1 Cre-	Macf1 Cre+		Genotype	Macf1 Cre-	Macf1 Cre+	Macf1 Cre-	Macf1 Cre+	Macf1 Cre-	Macf1 Cre+
	Age	3	3	8	8	12	12		Age	3	3	8	8	12	12		Age	3	3	8	8	12	12
		1.2012	1.79475	2.90298	3.9356	11.236	16.7719			4.95283	1.01523	0	7.11462	13.7931	25.9843			2.17066	2.77234	4.32268	13.3413	11.9517	33.5068
		6.48216	1.52772	3.13808	3.07692	12.127	14.8551			3.27869	3.90764	1.0989	4.29448	24.6032	37.0079			2.21135	4.78533	1.09658	5.59883	12.3158	37.5916
		1.36197	1.69492	1.85547	3.24748	6.25	14.1844			3.4632	4.73373	0	3.1746	27.7457	28.75			1.34702	4.19217	2.19412	5.42942	10.1215	14.6203
		3.91608	2.98742	1.16959	5.23466	4.31755	17.4444			3.16742	2.57732		2.47253	2.33645	25.641			1.29817	2.25006	2.25006	4.21172	5.33842	16.2242
				0.671141		3.20233	11.0831							4.70085	34.1667							3.07434	41.0473
				1.20614		2.04271	10.3627								50.3759
				4.6729		2.49716									33.5135
				3.88548		1.94986
				4.66472

## Sheet: 4C
number of muscle fibers per muscle			Tibialis Anterior							Soleus							Gastrocnemius
		Tibialis Anterior							Soleus							Gastrocnemius
	Genotype	Macf1 Cre-	Macf1 Cre+	Macf1 Cre-	Macf1 Cre+	Macf1 Cre-	Macf1 Cre+	Genotype	Macf1 Cre-	Macf1 Cre+	Macf1 Cre-	Macf1 Cre+	Macf1 Cre-	Macf1 Cre+	Genotype	Macf1 Cre-	Macf1 Cre+	Macf1 Cre-	Macf1 Cre+	Macf1 Cre-	Macf1 Cre+
	Age	3	3	8	8	12	12	Age	3	3	8	8	12	12	Age	3	3	8	8	12	12
		1665	2173	1309	559	687	397		424	394	109	253	133	185		4008	3066	3285	1679	988	1184
		1373	2291	1912	650	1077	579		183	563	82	163	214	127		4703	2236	2371	2054	1049	961
		1909	2006	1024	893	881	1109		231	169	67	315	234	127		3118	3268	2689	3039	1789	955
		1430	1272	684	554	718	1104		221	194	182	364	116	160		2465	3911		1757	1573	1580
				894		752	564				175		126	117						950	1017
				912		718	900				372		173	120
				321		1691					333			133
				489		1575					398

## Sheet: 4D
MACF1 mice myogenin relative gene expression level	2M - MACF1 Cre-	2M - MACF1 Cre+	3M - MACF1 Cre-	3M - MACF1 Cre+	6M - MACF1 Cre-	6M - MACF1 Cre+	9M - MACF1 Cre-	9M - MACF1 Cre+	12M - MACF1 Cre-	12M - MACF1 Cre+
	0.00752423	0.00904756	0.00652552	0.00748122	0.0243209	0.00721072	0.00289637	0.00334052	0.00608935	0.00504259
	0.0124559	0.00771074	0.00551871	0.00774451	0.00720271	0.00893694	0.00464121	0.00587524	0.0049498	0.00616757
	0.0079217	0.00675741	0.00749649	0.00906421	0.00832772	0.00607304	0.0045039	0.00588095	0.00836414	0.00624501
							0.00719234
							0.00586932

## Sheet: 4E
MACF1 mice myoD relative gene expression level	2M - MACF1 Cre-	2M - MACF1 Cre+	3M - MACF1 Cre-	3M - MACF1 Cre+	6M - MACF1 Cre-	6M - MACF1 Cre+	9M - MACF1 Cre-	9M - MACF1 Cre+	12M - MACF1 Cre-	12M - MACF1 Cre+
	0.494404	0.453036	0.570787	0.532083	0.260645	0.498847	0.569315	0.679172	0.729062	0.730715
	0.580303	0.50765	0.64007	0.545195	0.335556	0.669674	0.682383	0.598802	0.67646	0.553746
	0.395717	0.373296	0.402241	0.654618	0.579149	0.50861	0.763322	0.552996	0.506736	0.619706
							0.510581
							0.684836
