# Supplementary material for: MACF1 controls skeletal muscle function through the microtubule-dependent localization of extra-synaptic myonuclei and mitochondria biogenesis
Source: eLife. 2021 Aug 27;10:e70490. doi: 10.7554/eLife.70490 (PMC8500715; doi:10.7554/eLife.70490)
Supplement: Figure 4—source data 1. [file elife-70490-fig4-data1.xlsx]

## Sheet: 4B
distance between myonuclei (um)	2month - Cre -	2month - Cre +	6month - Cre -	6month - Cre +	12month - Cre -	12month - Cre +
	98.086	13.454	24.295	9.552	44.921	3.88
	57.587	2.406	10.57	39.042	57.111	23.028
	28.841	2.042	4.727	10.332	22.212	39.678
	40.481	8.447	5.943	21.547	21.947	4.764
	24.84	9.687	9.411	17.437	26.148	10.349
	23.782	3.507	32.274	46.581	22.118	21.713
	11.162	2.049	57.38	50.566	34.696	3.681
	9.294	18.823	20.145	25.217	39.718	12.813
	11.357	17.711	54.341	26.438	24.542	8.906
	20.731	11.739	3.081	17.044	40.584	21.547
	16.618	26.443	35.074	11.753	38.752	10.482
	35.488	7.555	48.844	18.261	28.39	6.274
	9.256	2.907	22.084	14.247	12.269	7.007
	17.166	3.609	19.659	13.734	15.675	25.961
	49.052	2.388	46.258	28.651	11.718	37.202
	36.296	1.94	36.487	11.929	33.374	7.936
	40.228	3.015	84.609	29.984	25.863	24.711
	34.515	4.693	65.264	17.25	44.746	27.094
	21.788	7.05	18.519	31.062	18.616	22.622
	50.601	10.446	56.013	27.679	51.91	11.326
	46.696	3.445	4.304	15.615	62.362	3.758
	29.713	17.688	11.569	18.823	88.473	4.304
	13.88	25.861	9.162	26.68	46.737	27.696
	18.528	20.309	4.776	20.782	48.549	8.425
	15.429	2.77	18.528	1.832	36.522	2.927
	17.566	11.793	13.236	3.507	40.949	14.536
	21.655	32.44	10.416	2.971	42.611	4.578
	32.256	6.882	9.75	1.701	12.935	5.058
	14.695	25.395	24.295	2.314	12.174	14.054
	41.535	25.402	12.59	1.464	12.292	20.079
	56.908	33.263	13.024	2.37	35.245	8.675
	8.181	14.773	28.086	1.227	31.632	21.296
	6.087	6.501	12.773	1.296	30.813	7.699
	2.658	4.578	18.188	1.569	32.625	4.739
	33.487	13.405	6.087	1.879	34.98	7.856
	2.806	7.647	10.236	2.575	39.344	4.304
	7.677	17.684	18.191	1.531	26.043	37.431
	10.685	19.249	12.254	2.603	36.147	1.522
	7.463	12.59	7.494	2.418	11.885	8.23
	12.297	21.875	15.007	2.364	23.298	18.06
	5.785	16.351	34.842	1.329	41.016	29.307
	9.624	9.256	13.551	2.049	36.075	32.232
	12.198	11.479	25.97	6.134	41.965	29.549
	24.181	19.747	20.473	37.389	5.785	47.141
	13.271	12.325	6.256	26.572	9.343	45.957
	13.818	16.39	33.251	30.626	3.88	48.787
	23.899	42.579	15.847	3.137	17.007	53.092
	12.59	5.952	31.321	28.923	16.849	29.313
	12.198	31.321	14.691	6.882	15.887	20.445
	4.907	27.595	16.133	26.838	4.954	29.122
	4.476	1.569	34.22	43.92	12.935	1.94
	8.534	10.76	24.197	41.868	15.582	9.438
	24.061	16.316	46.657	23.131	20.087	31.469
	21.195	5.277	43.218	23.143	30.813	14.326
	26.965	5.479	7.361	5.487	32.445	32.098
	12.461	4.143	4.628	28.764	29.829	9.75
	13.002	3.062	62.108	23.459	20.087	33.486
	2.743	13.824	72.049	13.024	3.21	29.975
	8.279	7.865	19.037	5.183	15.7	35.127
	10.388	6.393	2.806	2.658	33.006	5.854
	6.545	5.78	50.682	16.265	60.384	6.274
	67.962	8.873	30.994	2.743	65.482	10.287
	86.278	13.951	49.885	7.609	32.338	9.411
	31.778	1.925	27.577	9.436	22.707	15.388
	19.158	8.507	39.005	3.968	35.395	6.03
	73.735	12.213	21.426	2.512	19.082	5.795
	60.745	7.828	37.103	1.614	29.496	6.274
	69.948	14.992	34.382	1.454	43.582	7.33
	7.767	22.353	30.025	2.436	19.562	12.479
	50.362	21.335	37.146	2.152	21.154	23.974
	17.566	11.847	28.923	2.179	15.7	16.506
	19.082	3.747	36.299	1.776	23.29	42.657
	51.972	19.866	44.712	2.436	23.792	17.746
	18.038	54.923	29.605	2.477	26.552	29.564
	48.182	98.497	35.89	2.382	39.618	12.083
	37.057	8.133	33.353	2.69	26.907	4.776
	18.159	6.536	28.754	2.152	36.28	21.705
	10.894	2.892	31.806	2.07	45.179	17.098
	3.137	5.785	41.443	1.239	18.569	6.209
	12.912	23.754	47.948	1.676	22.222	10.685
	21.788	14.581	41.548	1.984	38.13	11.25
	28.536	2.971	3.804	2.388	51.453	12.16
	18.086	3.747	18.063	1.372	52.505	4.437
	4.358	4.209	17.35	1.372	52.116	4.437
	18.838	10.881	11.193	1.902	50.828	5.815
	23.191	19.327	7.893	2.238	61.593	4.424
	5.282	22.69	5.38	2.477	57.248	8.99
	52.549	4.842	34.266	1.372	49.142	5.455
	28.094	6.514	26.05	1.541	37.698	1.361
	6.572	8.873	33.962	7.694	30.981	2.382
	3.403	11.4	34.849	9.816	25.099	1.984
	23.138	9.371	20.989	10.969	39.113	3.137
	42.568	14.51	29.635	28.693	26.227	6.607
	3.081	3.407	18.503	24.801	8.99	3.081
	30.161	20.951	14.883	23.223	7.007	4.437
	14.087	8.888	36.415	21.907	20.756	2.042
	20.263	8.047	30.586	61.453	42.337	4.209
	40.528	6.976	35.924	20.801	29.619	2.07
	26.379	12.94	28.746	14.198	16.333	3.47
	41.185	6.942	33.597	47.455	25.572	3.403
	48.401	35.249	31.037	37.984	24.511	4.764
	72.138	41.201	29.18	21.825	19.164	2.722
	33.055	29.059	36.939	14.03	12.791	0.761
	11.569	49.105	3.681	22.826	26.068	0.761
	17.54	37.47	43.983	26.855	15.354	1.522
	6.465	37.406	38.511	52.31	23.841	1.076
	24.954	92.584	17.648	63.721	38.834	0.481
	6.501	66.514	22.055	8.568	25.253	1.701
	7.33	58.472	39.6	15.686	27.222	21.426
	17.516	52.3	17.97	22.078	53.735	22.491
	18.047	14.762	17.831	29.635	40.126	21.609
	15.293	23.741	14.392	23.34	18.353	17.723
	22.266	24.896	57.506	49.791	34.042	17.068
	9.672	32.966	22.432	32.283	39.319	19.082
	4.154	25.914	46.393	13.885	44.736	17.027
	5.38	29.37	11.125	23.697	38.342	41.061
	15.068	31.577	8.195	36.371	38.33	62.766
	31.52	22.821	43.246	24.972	43.556	41.387
	18.216	26.296	30.353	26.221	30.717	34.027
	17.516	30.123	15.675	31.513	28.762	23.892
		3.758	29.643	22.118	33.069	13.818
		23.821	32.504	43.978	7.463	36.333
		33.699	35.743	40.749	3.351	25.097
		26.368	27.863	38.028	37.351	22.622
		17.017	5.024	25.577	41.903	12.059
		41.342	8.873	49.958	15.656	23.599
		35.213	33.376	48.318	16.687	10.438
		34.413	3.743	32.843	3.983	3.88
		51.761	33.623	34.266	4.437	6.607
			12.97	20.965	11.234	2.927
			48.735	20.354	30.351	9.162
			27.57	32.809	13.955	23.323
			26.619	49.611	6.572	34.45
			43.937	2.406	21.873	24.558
			41.109	3.21	7.432	9.162
			25.97	5.943	47.716	18.575
			44.341	11.614	16.836	15.996
			17.957	4.154	53.188	23.343
			53.061	26.519	37.166	31.279
			50.135	26.708	10.438	20.394
			23.587	4.872	31.938	4.954
			34.571	6.711		5.38
			48.32	2.283		15.996
			45.755	37.943		2.743
			31.129	32.779		27.648
			5.815	19.249		22.432
			43.022	30.246		2.152
				20.007		12.33
				14.328		11.433
				4.628		3.665
				4.111		3.403
				18.277		1.522
				17.566		0.681
				25.869		1.735
				30.206		4.836
				31.528		5.581
				32.47		6.805
				1.701		5.487
				40.359		10.857
				35.629		3.403
				32.627		2.152
				14.218		4.111
				26.359		2.927
				29.672		3.85
				3.743		3.743
				37.984		1.361
				11.909		2.722
				3.062		2.382
				4.264		2.743
				4.812		16.435
				5.952		21.628
				19.821		38.342
				32.331		19.488
				21.045		23.278
				20.557		15.418
				23.143		19.249
				23.58		4.358
				33.981		1.076
				26.438		2.743
				17.437		3.88
				25.427		3.081
				5.539		7.015
				23.343		17.407
				3.88		3.137
				16.233		3.665
				5.104		3.983
				31.828		1.403
				10.482		29.547
				5.058		2.658
				4.836		6.087
				2.179		1.076
				13.042		3.043
						1.021
						21.992
						28.797
						18.743
						16.122
						2.406
						3.21
						16.904
						8.534
						20.419
						18.114
						4.437
						6.572
						2.927
						3.21
						4.358
						16.061
						3.137
						2.591
						4.437
						5.058
						2.477
						0.681
						2.152
						2.152
						1.021
						0.34
						0.681
						1.361
						1.021
						1.076
						2.152
						15.217
						25.327
						70.528
						42.354
						56.956
						1.403
						1.701
						69.065
						17.863
						18.419
						17.97
						31.334
						26.619
						30.83
						27.374
						26.362
						3.553
						33.894
						18.528
						37.732
						57.37

## Sheet: 4C
myonuclei feret	2month - Cre -	2month - Cre +	6month - Cre -	6month - Cre +	12month - Cre -	12month - Cre +
	12.864	12.76	12.386	16.826	17.581	10.954
3 individual mice per condition	11.41	10.524	18.382	18.872	16.387	17.909
	12.873	12.069	13.949	14.228	18.14	14.155
	9.259	7.776	14.312	15.385	18.131	12.138
	12.434	11.033	17.516	16.063	15.848	15.602
	14.321	12.957	17.805	15.765	13.763	17.504
	13.63	11.829	20.474	16.897	16.826	13.763
	12.11	10.658	15.491	12.918	17.425	13.88
	15.385	8.881	20.419	15.961	22.526	20.83
	12.887	8.758	14.161	17.305	14.696	13.14
	13.79	9.017	11.671	17.196	12.981	13.409
	14.537	10.13	15.772	19.417	15.52	21.703
	15.358	10.873	19.696	13.402	18.198	16.712
	16.023	8.881	14.477	14.794	16.398	15.188
	13.734	12.912	15.826	11.525	16.591	16.847
	17.339	13.722	18.734	13.941	19.739	12.715
	9.387	9.326	21.788	10.446	17.652	12.484
	14.454	5.573	19.923	14.138	16.719	8.154
	12.521	15.074	14.748	10.821	16.377	7.557
	16.687	9.511	13.655	11.206	17.191	12.486
	8.827	6.134	15.713	14.007	17.832	16.464
	13.957	6.058	14.842	10.762	17.177	14.054
	15.896	11.705	14.01	10.522	11.946	16.313
	15.059	14.748	12.663	10.279	11.195	9.511
	15.175	14.162	14.015	9.92	18.789	13.013
	10.611	12.462	16.897	10.428	8.175	17.832
	15.757	14.122	15.961	10.243	14.236	12.056
	10.522	14.015	14.223	8.549	20.352	15.452
	8.827	15.986	10.473	10.332	16.376	14.125
	15.175	12.43	14.44	9.343	19.105	16.39
	20.039	12.882	13.611	6.357	17.292	10.679
	11.039	9.505	8.73	10.21	17.225	17.218
	11.137	13.402	15.088	10.181	16.925	7.716
	14.81	16.037	6.848	9.411	18.338	16.899
	10.98	15.549	16.517	9.245	15.705	8.563
	16.537	15.174	11.206	10.108	21.154	7.595
	10.74	14.373	19.619	12.392	20.292	16.572
	17.945	8.583	15.931	15.217	18.255	13.324
	10.55	9.119	21.223	15.11	14.561	14.915
	12.646	8.142	18.575	14.373	15.196	17.354
	14.534	12.957	14.659	9.541	15.452	17.606
	13.848	8.068	13.763	6.793	13.788	15.28
	10.361	7.345	11.438	13.7	16.469	17.809
	6.741	8.399	17.098	13.154	16.739	15.482
	9.91	13.206	15.195	15.713	16.517	14.312
	13.493	10.311	17.563	11.847	15.068	16.608
	14.155	17.642	13.833	18.128	15.068	13.422
	12.513	12.392	17.718	11.419	15.415	10.767
	12.788	8.715	18.227	10.504	14.223	16.665
	13.065	10.767	18.823	10.664	13.968	17.452
	15.909	11.65	16.665	18.243	11.705	17.917
	11.261	7.699	16.665	13.731	19.906	18.038
	10.577	10.923	14.441	21.47	15.713	15.531
	14.087	9.912	16.351	16.299	17.809	10.078
	11.505	18.473	14.907	17.042	14.63	13.585
	8.61	9.938	14.398	13.62	16.591	9.467
	12.297	8.23	15.713	11.792	18.719	15.76
	11.849	10.778	14.01	20.905	13.952	12.319
	9.579	13.34	15.564	11.491	13.083	7.658
	9.45	12.788	16.351	11.849	20.687	7.362
	10.473	9.863	16.166	14.756	19.374	12.755
	12.461	10.913	16.299	12.041	15.388	11.011
	15.376	8.406	13.522	12.056	20.857	15.193
	8.888	14.198	20.179	11.11	19.24	7.597
	13.951	8.447	14.545	13.696	16.867	19.101
	13.135	11.72	14.914	12.751	16.961	15.721
	14.548	9.08	16.713	11.413	13.907	11.114
	11.275	11.311	13.562	11.808	16.921	15.675
	15.624	13.253	16.019	9.745	18.419	9.94
	12.752	14.312	13.547	12.683	15.954	13.237
	14.461	11.888	13.392	10.434	18.657	8.73
	16.085	7.58	15.142	10.089	20.12	14.548
	14.653	11.018	12.935	9.518	16.475	11.72
	12.56	11.998	13.62	11.118	14.735	13.262
	11.357	14.966	17.35	13.95	18.566	11.546
	8.449	9.384	17.537	13.053	11.278	12.251
	15.11	10.26	16.377	12.976	18.545	13.356
	13.65	8.406	15.242	13.886	12.632	12.55
	12.224	10.598	20.149	11.896	15.831	10.576
	15.486	10.21	15.119	10.824	15.527	9.592
	12.788	9.638	18.734	12.334	13.974	10.814
	13.075	9.534	17.537	14.502	13.701	12.401
	12.43	11.671	15.723	13.966	17.741	10.546
	17.587	14.668	20.007	12.796	19.186	10.954
	14.798	11.574	18.074	14.301	17.421	10.251
	11.65	4.597	20.149	13.118	13.562	9.886
	16.087	9.162	21.705	14.508	11.681	10.633
	10.287	14.312	16.817	17.098	12.725	10.327
	15.426	14.3	21.321	17.042	17.206	9.761
	16.843	10.335	17.204	13.901	16.593	9.191
	14.773	13.118	23.271	11.505	12.334	10.335
	13.999	15.598	17.993	13.782	18.042	9.61
	14.63	12.052	18.419	17.65	20.965	9.573
	12.761	13.885	11.193	13.321	21.093	10.98
	14.88	12.809	11.946	13.882	20.355	12.429
	11.505	13.56	22.661	13.988	20.015	11.429
	12.536	13.717	20.391	15.068	15.336	10.427
	10.708	18.111	20.096	14.461	18.385	11.084
	13.461	6.165	15.174	11.234	12.326	8.627
	9.523	6.909	14.497	13.415	11.554	8.825
	14.056	13.114	13.37	14.381	11.357	8.874
	8.563	13.965	12.461	12.138	16.878	9.778
	14.677	12.374	17.167	11.505	18.463	9.462
	14.056	14.436	17.805	14.824	9.751	12.176
	6.942	11.993	16.517	12.505	13.628	18.734
	14.007	6.607	17.734	14.915	19.026	17.945
	12.479	10.131	17.007	15.52	17.705	19.654
	13.398	13.311	15.598	17.579	10.048	17.098
	12.406	11.885	13.889	16.295	16.795	16.973
		12.494	16.313	15.279	12.669	15.582
		17.036	15.904	15.206	18.752	13.509
		17.287	16.897	14.949	14.414	13.743
			16.52	15.16	20.519	12.878
			16.97	14.88	13.214	14.748
			14.597	12.725	14.853	12.09
			16.665	16.238	17.017	16.894
			15.388	17.787	17.331	13.047
			15.772	16.973		12.041
			13.952	14.301		13.965
				15.491		8.406
				19.105		10.198
				9.794		18.861
				9.456		10.583
				10.287		13.655
				17.124		10.151
				13.242		16.265
				17.566		5.058
				13.495		10.3
				8.827		17.587
				11.091		12.897
				14.941		19.488
				15.068		11.282
				12.167		14.191
				19.374		11.349
				17.812		11.039
				15.833		10.361
				10.922		10.1
				15.862		9.541
				17.967		11.515
				13.977		11.8
				8.983		10.416
				18.502		12.284
				11.589		14.941
				16.739		11.46
				16.398		11.614
				24.594		9.541
				10.438		10.143
				14.253		11.137
				16.08		10.349
				18.038		10.744
				11.849		12.715
				12.03		10.208
				13.288		12.402
				14.393		11.206
				19.406		11.261
				14.223		12.309
				11.059		14.015
				13.021		13.548
				16.601		13.743
				15.088		11.983
				10.287		9.865
				16.464		9.722
				16.99		12.517
				15.686		15.26
				18.787		10.357
				14.709		16.252
				14.035		13.782
				10.583		13.172
				11.46		11.235
				15.698		13.454
				15.114		13.551
				13.105		13.877
				8.608		12.728
				9.751		13.885
				13.233		16.233
				12.86		14.536
				12.967		12.505
						14.486
						16.061
						10.482
						9.494
						9.763
						8.344
						12.751
						7.47
						8.544
						8.983
						10.366
						11.862
						9.364
						10.131
						9.156
						7.973
						8.309
						8.507
						8.67
						12.322
						8.232
						8.025
						8.253
						17.909
						18.823
						17.33
						13.483
						15.406
						13.24
						17.516
						12.03
						10.349
						6.02
						14.925
						10.658
						13.666
						10.366

## Sheet: 4D
myonuclei roundness	2month - Cre -	2month - Cre +	6month - Cre -	6month - Cre +	12month - Cre -	12month - Cre +
	0.298	0.266	0.419	0.381	0.431	0.35
3 individual mice per condition	0.302	0.39	0.527	0.223	0.308	0.249
	0.252	0.527	0.385	0.392	0.373	0.471
	0.477	0.65	0.484	0.465	0.364	0.376
	0.466	0.448	0.174	0.436	0.448	0.286
	0.764	0.528	0.419	0.476	0.531	0.494
	0.543	0.388	0.176	0.358	0.347	0.645
	0.291	0.686	0.468	0.47	0.49	0.357
	0.351	0.574	0.284	0.409	0.266	0.3
	0.178	0.81	0.34	0.419	0.722	0.289
	0.604	0.781	0.31	0.413	0.883	0.261
	0.379	0.585	0.303	0.28	0.521	0.319
	0.311	0.279	0.291	0.341	0.282	0.356
	0.426	0.543	0.354	0.362	0.338	0.418
	0.216	0.428	0.442	0.689	0.177	0.273
	0.336	0.586	0.318	0.492	0.292	0.667
	0.495	0.752	0.192	0.596	0.412	0.541
	0.222	0.836	0.313	0.296	0.458	0.671
	0.508	0.254	0.254	0.493	0.515	0.639
	0.297	0.907	0.295	0.513	0.485	0.577
	0.398	0.68	0.418	0.229	0.376	0.348
	0.291	0.906	0.327	0.319	0.252	0.446
	0.333	0.331	0.526	0.329	0.777	0.293
	0.406	0.46	0.369	0.409	0.954	0.716
	0.402	0.312	0.304	0.36	0.446	0.383
	0.226	0.747	0.475	0.307	0.776	0.393
	0.287	0.431	0.417	0.458	0.221	0.547
	0.626	0.561	0.305	0.572	0.287	0.485
	0.425	0.336	0.508	0.492	0.219	0.348
	0.451	0.438	0.52	0.433	0.334	0.344
	0.197	0.396	0.27	0.709	0.345	0.318
	0.52	0.741	0.51	0.336	0.337	0.28
	0.671	0.396	0.403	0.423	0.345	0.908
	0.239	0.294	0.749	0.377	0.37	0.264
	0.564	0.311	0.356	0.481	0.402	0.517
	0.332	0.56	0.407	0.484	0.232	0.834
	0.464	0.334	0.327	0.365	0.173	0.265
	0.437	0.732	0.356	0.438	0.504	0.373
	0.619	0.561	0.354	0.262	0.375	0.389
	0.287	0.77	0.396	0.418	0.226	0.413
	0.322	0.346	0.434	0.9	0.576	0.392
	0.555	0.637	0.587	0.945	0.626	0.443
	0.644	0.481	0.69	0.599	0.281	0.438
	0.357	0.639	0.252	0.36	0.53	0.445
	0.743	0.294	0.397	0.568	0.307	0.436
	0.463	0.869	0.321	0.81	0.585	0.383
	0.368	0.33	0.503	0.307	0.206	0.337
	0.357	0.287	0.352	0.394	0.428	0.316
	0.371	0.762	0.373	0.502	0.559	0.437
	0.234	0.67	0.341	0.53	0.256	0.36
	0.213	0.612	0.367	0.433	0.313	0.334
	0.471	0.666	0.446	0.57	0.284	0.239
	0.468	0.8	0.426	0.175	0.405	0.226
	0.223	0.531	0.486	0.259	0.359	0.343
	0.351	0.371	0.374	0.274	0.582	0.61
	0.717	0.508	0.668	0.422	0.339	0.336
	0.246	0.427	0.532	0.517	0.37	0.412
	0.284	0.381	0.68	0.242	0.77	0.75
	0.288	0.592	0.557	0.477	0.43	0.659
	0.648	0.446	0.414	0.501	0.352	0.674
	0.569	0.519	0.524	0.184	0.292	0.362
	0.313	0.377	0.456	0.27	0.596	0.408
	0.381	0.687	0.371	0.274	0.205	0.373
	0.543	0.507	0.225	0.347	0.298	0.827
	0.207	0.378	0.381	0.301	0.515	0.196
	0.265	0.329	0.451	0.395	0.189	0.321
	0.242	0.499	0.369	0.451	0.698	0.304
	0.513	0.527	0.262	0.549	0.311	0.533
	0.53	0.48	0.355	0.642	0.283	0.607
	0.756	0.667	0.568	0.557	0.327	0.492
	0.374	0.431	0.484	0.629	0.345	0.698
	0.21	0.833	0.392	0.622	0.254	0.212
	0.61	0.334	0.48	0.587	0.201	0.472
	0.448	0.281	0.517	0.488	0.535	0.462
	0.587	0.208	0.394	0.412	0.403	0.413
	0.641	0.782	0.222	0.348	0.347	0.228
	0.238	0.614	0.317	0.322	0.287	0.334
	0.553	0.834	0.231	0.343	0.292	0.386
	0.441	0.441	0.29	0.455	0.263	0.487
	0.531	0.721	0.331	0.479	0.328	0.459
	0.304	0.502	0.274	0.387	0.418	0.434
	0.451	0.634	0.35	0.296	0.382	0.39
	0.698	0.66	0.424	0.36	0.345	0.603
	0.377	0.298	0.309	0.447	0.342	0.467
	0.603	0.616	0.236	0.647	0.394	0.258
	0.741	0.718	0.152	0.677	0.288	0.391
	0.165	0.713	0.216	0.319	0.494	0.413
	0.531	0.504	0.207	0.169	0.525	0.363
	0.336	0.35	0.251	0.295	0.39	0.377
	0.367	0.539	0.232	0.643	0.293	0.426
	0.319	0.238	0.194	0.712	0.63	0.388
	0.529	0.22	0.356	0.493	0.252	0.426
	0.203	0.335	0.293	0.367	0.268	0.383
	0.523	0.337	0.449	0.284	0.235	0.31
	0.296	0.352	0.434	0.49	0.319	0.261
	0.251	0.303	0.202	0.469	0.282	0.417
	0.347	0.237	0.222	0.5	0.322	0.528
	0.323	0.338	0.197	0.369	0.375	0.525
	0.326	0.643	0.58	0.624	0.3	0.682
	0.547	0.724	0.527	0.657	0.328	0.686
	0.505	0.33	0.396	0.522	0.283	0.659
	0.588	0.242	0.374	0.329	0.418	0.6
	0.244	0.277	0.341	0.707	0.327	0.765
	0.243	0.464	0.5	0.345	0.469	0.465
	0.87	0.626	0.363	0.664	0.272	0.327
	0.461	0.779	0.264	0.415	0.343	0.371
	0.569	0.456	0.183	0.535	0.383	0.245
	0.56	0.561	0.516	0.333	0.45	0.395
	0.311	0.465	0.654	0.288	0.346	0.283
		0.224	0.218	0.417	0.287	0.556
		0.175	0.275	0.273	0.313	0.301
		0.316	0.479	0.393	0.341	0.7
			0.284	0.374	0.266	0.559
			0.232	0.393	0.264	0.413
			0.406	0.338	0.416	0.337
			0.403	0.396	0.383	0.366
			0.258	0.323	0.283	0.307
			0.224	0.318		0.336
			0.32	0.465		0.391
				0.461		0.654
				0.282		0.76
				0.901		0.362
				0.754		0.402
				0.361		0.257
				0.235		0.41
				0.277		0.486
				0.332		0.909
				0.366		0.369
				0.492		0.225
				0.392		0.297
				0.241		0.189
				0.281		0.336
				0.36		0.494
				0.27		0.468
				0.196		0.532
				0.351		0.545
				0.331		0.66
				0.228		0.767
				0.266		0.514
				0.578		0.639
				0.437		0.706
				0.289		0.549
				0.432		0.2
				0.264		0.481
				0.36		0.59
				0.255		0.667
				0.367		0.733
				0.24		0.66
				0.397		0.769
				0.275		0.782
				0.326		0.611
				0.346		0.959
				0.663		0.819
				0.519		0.399
				0.164		0.405
				0.363		0.546
				0.36		0.486
				0.363		0.514
				0.192		0.5
				0.338		0.631
				0.384		0.394
				0.215		0.466
				0.373		0.356
				0.418		0.406
				0.33		0.499
				0.326		0.332
				0.439		0.314
				0.608		0.427
				0.57		0.586
				0.545		0.394
				0.441		0.371
				0.622		0.268
				0.458		0.35
				0.424		0.229
				0.367		0.221
				0.571		0.258
				0.778		0.379
						0.275
						0.279
						0.522
						0.588
						0.632
						0.928
						0.2
						0.422
						0.463
						0.476
						0.563
						0.559
						0.757
						0.64
						0.754
						0.882
						0.842
						0.817
						0.893
						0.658
						0.533
						0.734
						0.628
						0.479
						0.314
						0.372
						0.306
						0.275
						0.767
						0.296
						0.828
						0.476
						0.797
						0.455
						0.403
						0.365
						0.433

## Sheet: 4F
percentage of myonuclei delocalization		Tibialis Anterior
	Genotype	Macf1 Cre-	Macf1 Cre+	Macf1 Cre-	Macf1 Cre+	Macf1 Cre-	Macf1 Cre+
	Age	3	3	8	8	12	12
		1.2012	1.79475	2.90298	3.9356	11.236	16.7719
		6.48216	1.52772	3.13808	3.07692	12.127	14.8551
		1.36197	1.69492	1.85547	3.24748	6.25	14.1844
		3.91608	2.98742	1.16959	5.23466	4.31755	17.4444
				0.671141		3.20233	11.0831
				1.20614		2.04271	10.3627
				4.6729		2.49716
				3.88548		1.94986
				4.66472

## Sheet: 4G
CSA analysis
mice of 3 month old
	Macf1 Cre-				Macf1 Cre-				Macf1 Cre+				Macf1 Cre+
	Area	Number of fibers	%		Area	Number of fibers	%		Area	Number of fibers	%		Area	Number of fibers	%
	0-500	14	0.903226		0-500	44	3.27138		0-500	45	4.36893		0-500	156	6.75032
	500-750	111	7.16129		500-750	165	12.2677		500-750	56	5.43689		500-750	343	14.8421
	750-1000	184	11.871		750-1000	197	14.6468		750-1000	95	9.2233		750-1000	400	17.3085
	1000-1500	316	20.3871		1000-1500	286	21.2639		1000-1500	207	20.0971		1000-1500	445	19.2557
	1500-2000	183	11.8065		1500-2000	160	11.8959		1500-2000	157	15.2427		1500-2000	321	13.8901
	2000-2500	161	10.3871		2000-2500	137	10.1859		2000-2500	132	12.8155		2000-2500	319	13.8035
	2500-3000	150	9.67742		2500-3000	132	9.81413		2500-3000	116	11.2621		2500-3000	212	9.17352
	3000-3500	123	7.93548		3000-3500	121	8.99628		3000-3500	116	11.2621		3000-3500	84	3.63479
	3500-4000	118	7.6129		3500-4000	56	4.16357		3500-4000	66	6.40777		3500-4000	21	0.908698
	4000-4500	100	6.45161		4000-4500	28	2.08178		4000-4500	32	3.1068		4000-4500	9	0.389442
	4500-5000	59	3.80645		4500-5000	16	1.18959		4500-5000	6	0.582524		4500-5000	1	0.0432713
	5000-5500	31	2		5000-5500	3	0.223048		5000-5500	2	0.194175		5000-5500	0	0
		1550	100			1345	100			1030	100			2311	100
	Macf1 Cre+				Macf1 Cre-				Macf1 Cre+				Macf1 Cre-
	Area	Number of fibers	%		Area	Number of fibers	%		Area	Number of fibers	%		Area	Number of fibers	%
	0-500	55	2.82631		0-500	48	3.23887		0-500	11	0.981267		0-500	5	0.553097
	500-750	146	7.50257		500-750	81	5.46559		500-750	39	3.47904		500-750	15	1.65929
	750-1000	198	10.1747		750-1000	95	6.41026		750-1000	88	7.85013		750-1000	25	2.76549
	1000-1500	435	22.3535		1000-1500	283	19.0958		1000-1500	254	22.6583		1000-1500	119	13.1637
	1500-2000	314	16.1357		1500-2000	261	17.6113		1500-2000	171	15.2542		1500-2000	130	14.3805
	2000-2500	224	11.5108		2000-2500	184	12.4157		2000-2500	110	9.81267		2000-2500	114	12.6106
	2500-3000	162	8.32477		2500-3000	144	9.7166		2500-3000	109	9.72346		2500-3000	110	12.1681
	3000-3500	153	7.86228		3000-3500	123	8.2996		3000-3500	116	10.3479		3000-3500	96	10.6195
	3500-4000	134	6.88592		3500-4000	97	6.54521		3500-4000	91	8.11775		3500-4000	97	10.7301
	4000-4500	71	3.64851		4000-4500	74	4.99325		4000-4500	77	6.86887		4000-4500	86	9.51327
	4500-5000	35	1.79856		4500-5000	58	3.91363		4500-5000	37	3.30062		4500-5000	54	5.97345
	5000-5500	19	0.976362		5000-5500	34	2.2942		5000-5500	18	1.60571		5000-5500	53	5.86283
		1946	100			1482	100			1121	100			904	100
mice of 8 month old
	Macf1 Cre-				Macf1 Cre-								Macf1 Cre-					Macf1 Cre+				Macf1 Cre+				Macf1 Cre+
	Area	Number of fibers	%		Area	Number of fibers	%						Area	Number of fibers	%			Area	Number of fibers	%		Area	Number of fibers	%		Area	Number of fibers	%
	0-500	17	1.50442		0-500	74	3.74115						0-500	1	0.151976			0-500	18	2.91734		0-500	21	4.66667		0-500	25	2.98329
	500-750	69	6.10619		500-750	227	11.4762						500-750	14	2.12766			500-750	54	8.75203		500-750	49	10.8889		500-750	48	5.72792
	750-1000	124	10.9735		750-1000	273	13.8018						750-1000	31	4.71125			750-1000	52	8.42788		750-1000	47	10.4444		750-1000	71	8.47255
	1000-1500	261	23.0973		1000-1500	463	23.4075						1000-1500	97	14.7416			1000-1500	123	19.9352		1000-1500	79	17.5556		1000-1500	125	14.9165
	1500-2000	212	18.7611		1500-2000	392	19.818						1500-2000	79	12.0061			1500-2000	93	15.0729		1500-2000	84	18.6667		1500-2000	137	16.3484
	2000-2500	190	16.8142		2000-2500	272	13.7513						2000-2500	104	15.8055			2000-2500	105	17.0178		2000-2500	62	13.7778		2000-2500	123	14.6778
	2500-3000	126	11.1504		2500-3000	166	8.39232						2500-3000	103	15.6535			2500-3000	89	14.4246		2500-3000	50	11.1111		2500-3000	104	12.4105
	3000-3500	88	7.78761		3000-3500	67	3.38726						3000-3500	91	13.8298			3000-3500	37	5.99676		3000-3500	32	7.11111		3000-3500	111	13.2458
	3500-4000	27	2.38938		3500-4000	31	1.56724						3500-4000	76	11.5502			3500-4000	28	4.53809		3500-4000	12	2.66667		3500-4000	53	6.32458
	4000-4500	12	1.06195		4000-4500	11	0.556117						4000-4500	37	5.6231			4000-4500	10	1.62075		4000-4500	5	1.11111		4000-4500	32	3.81862
	4500-5000	3	0.265487		4500-5000	2	0.101112						4500-5000	18	2.73556			4500-5000	5	0.810373		4500-5000	6	1.33333		4500-5000	9	1.07399
	5000-5500	1	0.0884956		5000-5500	0	0						5000-5500	7	1.06383			5000-5500	3	0.486224		5000-5500	3	0.666667		5000-5500	0	0
		1130	100			1978	100							658	100				617	100			450	100			838	100
																		Macf1 Cre+				Macf1 Cre+				Macf1 Cre+				Macf1 Cre+
	Macf1 Cre-								Macf1 Cre-				Macf1 Cre-					Area	Number of fibers	%		Area	Number of fibers	%		Area	Number of fibers	%		Area	Number of fibers	%
	Area	Number of fibers	%						Area	Number of fibers	%		Area	Number of fibers	%			0-500	14	1.52174		0-500	25	2.85388		0-500	18	2.68256		0-500	14	1.8617
	0-500	47	3.59327						0-500	13	1.51339		0-500	11	1.18153			500-750	51	5.54348		500-750	62	7.07763		500-750	37	5.51416		500-750	65	8.64362
	500-750	104	7.95107						500-750	38	4.42375		500-750	23	2.47046			750-1000	60	6.52174		750-1000	76	8.6758		750-1000	66	9.83607		750-1000	93	12.367
	750-1000	139	10.6269						750-1000	44	5.12224		750-1000	58	6.22986			1000-1500	135	14.6739		1000-1500	136	15.5251		1000-1500	117	17.4367		1000-1500	146	19.4149
	1000-1500	253	19.3425						1000-1500	140	16.298		1000-1500	138	14.8228			1500-2000	110	11.9565		1500-2000	129	14.726		1500-2000	112	16.6915		1500-2000	137	18.2181
	1500-2000	261	19.9541						1500-2000	104	12.1071		1500-2000	127	13.6412			2000-2500	115	12.5		2000-2500	125	14.2694		2000-2500	111	16.5425		2000-2500	152	20.2128
	2000-2500	226	17.2783						2000-2500	108	12.5728		2000-2500	111	11.9227			2500-3000	143	15.5435		2500-3000	122	13.9269		2500-3000	112	16.6915		2500-3000	88	11.7021
	2500-3000	163	12.4618						2500-3000	135	15.7159		2500-3000	116	12.4597			3000-3500	107	11.6304		3000-3500	95	10.8447		3000-3500	58	8.64382		3000-3500	38	5.05319
	3000-3500	83	6.34557						3000-3500	109	12.6892		3000-3500	116	12.4597			3500-4000	120	13.0435		3500-4000	62	7.07763		3500-4000	26	3.87481		3500-4000	18	2.39362
	3500-4000	22	1.68196						3500-4000	90	10.4773		3500-4000	100	10.7411			4000-4500	49	5.32609		4000-4500	30	3.42466		4000-4500	11	1.63934		4000-4500	1	0.132979
	4000-4500	8	0.611621						4000-4500	51	5.93714		4000-4500	78	8.37809			4500-5000	16	1.73913		4500-5000	12	1.36986		4500-5000	0	0		4500-5000	0	0
	4500-5000	1	0.0764526						4500-5000	24	2.79395		4500-5000	39	4.18904			5000-5500	0	0		5000-5500	2	0.228311		5000-5500	3	0.447094		5000-5500	0	0
	5000-5500	1	0.0764526						5000-5500	3	0.349243		5000-5500	14	1.50376				920	100			876	100			671	100			752	100
		1308	100							859	100			931	100
	Macf1 Cre-				Macf1 Cre-
	Area	Number of fibers	%		Area	Number of fibers	%
	0-500	1	0.21692		0-500	1	0.362319
	500-750	6	1.30152		500-750	8	2.89855
	750-1000	15	3.2538		750-1000	10	3.62319
	1000-1500	54	11.7137		1000-1500	31	11.2319
	1500-2000	56	12.1475		1500-2000	49	17.7536
	2000-2500	75	16.269		2000-2500	43	15.5797
	2500-3000	68	14.7505		2500-3000	38	13.7681
	3000-3500	68	14.7505		3000-3500	31	11.2319
	3500-4000	38	8.24295		3500-4000	26	9.42029
	4000-4500	41	8.89371		4000-4500	16	5.7971
	4500-5000	20	4.33839		4500-5000	16	5.7971
	5000-5500	19	4.12148		5000-5500	7	2.53623
		461	100			276	100
mice of 12 month old
	Macf1 Cre-				Macf1 Cre-					Macf1 Cre+				Macf1 Cre+				Macf1 Cre+
	Area	Number of fibers	%		Area	Number of fibers	%			Area	Number of fibers	%		Area	Number of fibers	%		Area	Number of fibers	%
	0-500	53	2.75754		0-500	5	2.03252			0-500	106	7.27522		0-500	26	2.18487		0-500	27	2.49769
	500-750	45	2.34131		500-750	14	5.69106			500-750	188	12.9032		500-750	57	4.78992		500-750	79	7.30805
	750-1000	99	5.15088		750-1000	23	9.34959			750-1000	190	13.0405		750-1000	143	12.0168		750-1000	147	13.5985
	1000-1500	405	21.0718		1000-1500	62	25.2033			1000-1500	313	21.4825		1000-1500	318	26.7227		1000-1500	283	26.1795
	1500-2000	326	16.9615		1500-2000	38	15.4472			1500-2000	212	14.5504		1500-2000	190	15.9664		1500-2000	177	16.3737
	2000-2500	267	13.8918		2000-2500	46	18.6992			2000-2500	166	11.3933		2000-2500	154	12.9412		2000-2500	132	12.2109
	2500-3000	226	11.7586		2500-3000	34	13.8211			2500-3000	144	9.88332		2500-3000	104	8.7395		2500-3000	109	10.0833
	3000-3500	173	9.00104		3000-3500	14	5.69106			3000-3500	78	5.35347		3000-3500	82	6.89076		3000-3500	65	6.01295
	3500-4000	135	7.02393		3500-4000	5	2.03252			3500-4000	44	3.0199		3500-4000	51	4.28571		3500-4000	32	2.96022
	4000-4500	111	5.77523		4000-4500	5	2.03252			4000-4500	13	0.892244		4000-4500	37	3.10924		4000-4500	21	1.94265
	4500-5000	58	3.01769		4500-5000	0	0			4500-5000	3	0.205903		4500-5000	19	1.59664		4500-5000	6	0.555042
	5000-5500	24	1.2487		5000-5500	0	0			5000-5500	0	0		5000-5500	9	0.756303		5000-5500	3	0.277521
		1922	100			246	100				1457	100			1190	100			1081	100
	Macf1 Cre-				Macf1 Cre-					Macf1 Cre+
	Area	Number of fibers	%		Area	Number of fibers	%			Area	Number of fibers	%
	0-500	13	1.79558		0-500	16	2.46154			0-500	4	1.06383
	500-750	33	4.55801		500-750	49	7.53846			500-750	14	3.7234
	750-1000	32	4.41989		750-1000	78	12			750-1000	17	4.52128
	1000-1500	108	14.9171		1000-1500	106	16.3077			1000-1500	51	13.5638
	1500-2000	98	13.5359		1500-2000	100	15.3846			1500-2000	50	13.2979
	2000-2500	111	15.3315		2000-2500	110	16.9231			2000-2500	45	11.9681
	2500-3000	95	13.1215		2500-3000	93	14.3077			2500-3000	54	14.3617
	3000-3500	71	9.80663		3000-3500	57	8.76923			3000-3500	44	11.7021
	3500-4000	73	10.0829		3500-4000	22	3.38462			3500-4000	40	10.6383
	4000-4500	49	6.76796		4000-4500	14	2.15385			4000-4500	26	6.91489
	4500-5000	26	3.59116		4500-5000	4	0.615385			4500-5000	18	4.78723
	5000-5500	15	2.07182		5000-5500	1	0.153846			5000-5500	13	3.45745
		724	100			650	100				376	100
