# Supplementary material for: MACF1 controls skeletal muscle function through the microtubule-dependent localization of extra-synaptic myonuclei and mitochondria biogenesis
Source: eLife. 2021 Aug 27;10:e70490. doi: 10.7554/eLife.70490 (PMC8500715; doi:10.7554/eLife.70490)
Supplement: Figure 5—source data 1. [file elife-70490-fig5-data1.xlsx]

## Sheet: 5B
NMJs area	2month - Cre -	2month - Cre +	6month - Cre -	6month - Cre +	12month - Cre -	12month - Cre +
	359.53	239.094	568.383	132.645	428.733	284.322
obtained from different myofibers from 3 individual mouse per condition	379.944	163.943	223.998	454.705	341.299	312.182
	442.229	619.943	551.073	227.638	342.756	141.35
	455.92	457.02	411.155	180.391	560.842	284.278
	294.793	178.213	677.415	139.686	498.384	330.773
	138.159	442.113	312.204	272.128	394.446	280.373
	139.889		497.313	157.726	481.704	177.294
	227.009		244.449	337.09	332.285	351.013
	337.958			330.628	356.1	154.593
				189.929	346.302	378.873
					662.052
					413.16
					486.654
					316.206

## Sheet: 5C
number of AChR clusters	2month - Cre -	2month - Cre +	6month - Cre -	6month - Cre +	12month - Cre -	12month - Cre +
	1	3	2	2	2	13
obtained from different myofibers from 3 individual mouse per condition	1	1	1	5	2	3
	1	1	4	3	1	1
	3	3	2	10	4	16
	2	2	1	7	1	4
	1	1	1	1	4	3
	1		3	6	3	7
	1		1	8	3	3
	1			9	5	4
				7	2	6
					3
					2
					2
					3

## Sheet: 5D
number of synaptic myonuclei	2month - Cre -	2month - Cre +	6month - Cre -	6month - Cre +	12month - Cre -	12month - Cre +
	5	4	11	5	14	9
obtained from different myofibers from 3 individual mouse per condition	13	4	7	10	9	5
	6	12	16	11	8	4
	8	10	10	4	15	5
	8	6	9	9	18	6
	6	8	7	4	13	6
	9		6	5	17	6
	7		9	8	11	7
	6			9	17	6
				6	8	10
					8
					9
					11
					11

## Sheet: 5F
Ratio of tubulin staining
tub. Tyr. / tub. Tot.			tub. DeTyr. / tub. Tot.			tub. DeTyr. / tub. Tyr.
	MACF1 Cre -	MACF1 Cre +		MACF1 Cre -	MACF1 Cre +		MACF1 Cre -	MACF1 Cre +
obtained from different myofibers from 3 individual mouse per condition	1.08119	0.312067		0.740278	0.413391		0.684691	1.32469
	0.638203	0.998969		0.512067	0.637408		0.802359	0.638066
	0.695638	1.23077		0.644815	0.628409		0.926941	0.510581
	0.92535	0.989554		0.716379	0.77875		0.774171	0.78697
	1.03468	1.51246		0.587808	1.26264		0.568104	0.83483
	1.33339	1.2607		1.22495	1.34073		0.918673	1.06348
	1.39274	0.770133		0.820295	0.596518		0.588978	0.774564
	0.77286	1.16828		0.528999	0.907721		0.684469	0.776974
	0.665973	0.635206		0.519772	0.734926		0.78047	1.15699
	1.43465	1.21105		0.989867	0.718177		0.689973	0.593021
		1.00299			0.80206			0.799671
	1.13387	1.47443		0.693089	1.32563		0.611262	0.899084
	0.59092			0.542529			0.91811
	0.67279	0.817101		1.04165	0.305241		1.54825	1.22384
	1.25929	1.33759		0.936975	0.980489		0.74405	0.733029
	1.63175	0.979597		1.85227	0.845533		1.13514	0.863144
		1.08435			0.925643			0.85364

## Sheet: 5H
CSA analysis	MACF1 Cre -													MACF1 Cre +
	G Souris 41 D Ho/- (41-1)				G Souris 43 D Ho/- (43-2)				G Souris 41 ND Ho/- (41-2)					G Souris 42 D Ho/+ (42-3)				G Souris 44 D Ho/+ (44-3)				G Souris 42 ND Ho/+ (42-3)
	Area	Number of fibers	% of fibers		Area	Number of fibers	% of fibers		Area	Number of fibers	% of fibers			Area	Number of fibers	% of fibers		Area	Number of fibers	% of fibers		Area	Number of fibers	% of fibers
	0-500	94	9.44724		0-500	182	10.3822		0-500	107	5.8089			0-500	519	27.1728		0-500	298	19.1394		0-500	76	6.14887
	500-1000	398	40		500-1000	1105	63.0348		500-1000	557	30.2389			500-1000	828	43.3508		500-1000	568	36.4804		500-1000	203	16.4239
	1000-1500	345	34.6734		1000-1500	424	24.1871		1000-1500	430	23.3442			1000-1500	424	22.199		1000-1500	392	25.1766		1000-1500	196	15.8576
	1500-2000	126	12.6633		1500-2000	38	2.16771		1500-2000	316	17.1553			1500-2000	111	5.81152		1500-2000	168	10.79		1500-2000	214	17.3139
	2000-2500	28	2.81407		2000-2500	4	0.22818		2000-2500	212	11.5092			2000-2500	23	1.20419		2000-2500	73	4.6885		2000-2500	171	13.835
	2500-3000	4	0.40201		2500-3000		0		2500-3000	118	6.40608			2500-3000	3	0.157068		2500-3000	27	1.7341		2500-3000	159	12.8641
	3000-3500		0		3000-3500		0		3000-3500	65	3.52877			3000-3500	2	0.104712		3000-3500	16	1.02762		3000-3500	103	8.33333
	3500-4000		0		3500-4000		0		3500-4000	24	1.30293			3500-4000		0		3500-4000	9	0.578035		3500-4000	65	5.2589
	4000-4500		0		4000-4500		0		4000-4500	10	0.542888			4000-4500		0		4000-4500	4	0.256904		4000-4500	24	1.94175
	4500-5000		0		4500-5000		0		4500-5000	3	0.162866			4500-5000		0		4500-5000	1	0.0642261		4500-5000	18	1.45631
	5000-5500		0		5000-5500		0		5000-5500	0	0			5000-5500		0		5000-5500	1	0.0642261		5000-5500	7	0.566343
		995	100			1753	100			1842	100				1910	100			1557	100			1236	100
	G Souris 35 D Ho/- (35-3)				G Souris 43 ND Ho/- (43-3)				G Souris 35 ND Ho/- (35-2)					G Souris 22 D Ho/+ (22-2)- 10 mois				G Souris 44 ND Ho/+ (44-3)				G Souris 22 ND Ho/+ (22-3)- 10 mois
	Area	Number of fibers	% of fibers		Area	Number of fibers	% of fibers		Area	Number of fibers	% of fibers			Area	Number of fibers	% of fibers		Area	Number of fibers	% of fibers		Area	Number of fibers	% of fibers
	0-500	213	6.35821		0-500	283	14.4314		0-500	74	3.96358			0-500	6	0.793651		0-500	49	3.14708		0-500	33	4.25258
	500-1000	1117	33.3433		500-1000	399	20.3468		500-1000	370	19.8179			500-1000	86	11.3757		500-1000	279	17.9191		500-1000	116	14.9485
	1000-1500	1127	33.6418		1000-1500	408	20.8057		1000-1500	377	20.1928			1000-1500	140	18.5185		1000-1500	421	27.0392		1000-1500	122	15.7216
	1500-2000	582	17.3731		1500-2000	361	18.409		1500-2000	334	17.8897			1500-2000	126	16.6667		1500-2000	337	21.6442		1500-2000	129	16.6237
	2000-2500	193	5.76119		2000-2500	275	14.0235		2000-2500	288	15.4258			2000-2500	104	13.7566		2000-2500	304	19.5247		2000-2500	110	14.1753
	2500-3000	79	2.35821		2500-3000	139	7.08822		2500-3000	210	11.248			2500-3000	95	12.5661		2500-3000	237	15.2216		2500-3000	89	11.4691
	3000-3500	29	0.865672		3000-3500	59	3.00867		3000-3500	119	6.37386			3000-3500	65	8.59788		3000-3500	138	8.8632		3000-3500	55	7.08763
	3500-4000	9	0.268657		3500-4000	20	1.01989		3500-4000	56	2.99946			3500-4000	64	8.46561		3500-4000	64	4.11047		3500-4000	60	7.73196
	4000-4500	1	0.0298507		4000-4500	7	0.356961		4000-4500	25	1.33905			4000-4500	36	4.7619		4000-4500	28	1.79833		4000-4500	31	3.99485
	4500-5000	0	0		4500-5000	7	0.356961		4500-5000	12	0.642742			4500-5000	19	2.51323		4500-5000	14	0.899165		4500-5000	23	2.96392
	5000-5500	0	0		5000-5500	3	0.152983		5000-5500	2	0.107124			5000-5500	15	1.98413		5000-5500	4	0.256904		5000-5500	8	1.03093
		3350	100			1961	100			1867	100				756	100			1875	120.424			776	100
					G Souris 43 D Ho/- (43-3)									G Souris 36 ND Ho/+ (36-3)				G Souris 36 D Ho/+ (36-3)				G Souris 27 D Ho/+ (27-3) - 9 mois				G Souris 27 ND Ho/+ (27-3) - 9 mois
					Area	Number of fibers	% of fibers							Area	Number of fibers	% of fibers		Area	Number of fibers	% of fibers		Area	Number of fibers	% of fibers		Area	Number of fibers	% of fibers
					0-500	287	12.3123							0-500	9	0.868726		0-500	628	19.0418		0-500	291	9.63257		0-500	140	6.01892
					500-1000	1309	56.1562							500-1000	69	6.66023		500-1000	1393	42.2377		500-1000	1192	39.4571		500-1000	464	19.9484
					1000-1500	666	28.5714							1000-1500	125	12.0656		1000-1500	796	24.1358		1000-1500	1125	37.2393		1000-1500	477	20.5073
					1500-2000	62	2.6598							1500-2000	132	12.7413		1500-2000	298	9.03578		1500-2000	360	11.9166		1500-2000	454	19.5185
					2000-2500	7	0.3003							2000-2500	155	14.9614		2000-2500	125	3.79018		2000-2500	45	1.48957		2000-2500	361	15.5202
					2500-3000		0							2500-3000	128	12.3552		2500-3000	37	1.12189		2500-3000	7	0.231711		2500-3000	233	10.0172
					3000-3500		0							3000-3500	152	14.6718		3000-3500	15	0.454821		3000-3500	1	0.0331016		3000-3500	102	4.38521
					3500-4000		0							3500-4000	100	9.65251		3500-4000	4	0.121286		3500-4000		0		3500-4000	44	1.89166
					4000-4500		0							4000-4500	67	6.46718		4000-4500	1	0.0303214		4000-4500		0		4000-4500	32	1.37575
					4500-5000		0							4500-5000	51	4.92278		4500-5000	1	0.0303214		4500-5000		0		4500-5000	14	0.601892
					5000-5500		0							5000-5500	48	4.6332		5000-5500	0	0		5000-5500		0		5000-5500	5	0.214961
						2331	100								1036	100			3298	100			3021	100			2326	100

## Sheet: 5I
NMJs area	Cre- ND	Cre- D	Cre+ ND	Cre+ D
	400.371	283.996	366.245	237.492
obtained from different myofibers from 3 individual mouse per condition	304.352	515.762	744.926	185.61
	441.148	551.054	297.415	130.719
	418.88	275.436	255.481	168.084
	198.277	211.175	301.927	177.57
	257.794	197.004	176.182	430.911
	191.278	455.608	171.786	191.683
	390.538	551.161	250.044	497.774
	172.249	353.876	224.444	243.739
	270.457	371.083	367.05	295.363
	354.132	194.349	313.512	359.46
	458.458	456.066	215.552	328.953
	546.384	238.777	337.12	379.129
	311.003	197.801	280.922	346.616
	330.837	333.512	350.103	172.253
	545.802	318.275	419.614	195.93
	306.878	360.736	248.434	438.919
	356.064	382.433	368.443	199.781
	426.066	365.799	308.866	320.668
	425.998	260.487	239.072	322.244
	557.218	388.299	200.378	182.574
	351.414	232.872	290.391	219.303
	308.376	393.927	288.58	197.437
	345.027	466.586	298.059	291.828
	380.232	344.558	518.443	337.745
	320.051	235.382	261.603	169.131
	613.325	283.009	564.521	462.791
	275.311	321.059	280.339	451.12
	352.061	413.483	321.476	193.511
	460.025	363.589	281.047	472.183
	680.614	318.458	385.551	149.336
	490.845	244.795	363.116	261.004
	358.005	281.229	343.108	296.157
	325.477	316.751	321.306	310.382
	400.331	252.889	416.266	128.602
	560.345	335.453	200.877	204.162
	470.186	300.22	415.342	215.886
		382.564	407.1	252.659
			250.566	284.012
			153.717	202.903
			287.595	220.604
				277.13
				329.595

## Sheet: 5J
number of synaptic myonuclei	Cre- ND	Cre- D	Cre+ ND	Cre+ D
	8	9	6	7
obtained from different myofibers from 3 individual mouse per condition	8	8	10	6
	11	8	6	4
	9	7	6	5
	6	7	12	6
	9	9	6	5
	7	7	5	5
	7	9	4	5
	6	7	5	6
	8	6	5	6
	5	5	7	5
	6	7	6	4
	8	5	4	5
	9	5	5	8
	6	4	5	3
	5	6	7	4
	8	5	5	6
	8	5	8	4
	7	6	5	6
	9	5	6	5
	6	4	5	5
	8	3	6	5
	6	4	5	3
	8	7	8	8
	6	3	9	7
	5	2	6	4
	7	4	5	5
	6	6	3	6
	6	9	5	5
	8	5	4	3
	8	5	3	3
	10	5	10	5
	7	4	7	4
	7	6	8	3
	7	3	7	3
	7	6	7	6
	9	4	6	5
		6	6	5
			7	6
			6	4
			4	5
				3
				4

## Sheet: 5L
percentage of myofibers positive for AChR staining		shSCR	shMACF1.1	shMACF1.2	shMACF1.3	shMACF1.4	shMACF1.mix
		75	39.13	52.82	58.82	41.93	65.9
		60.86	35.64	37.61	37.61	40.5	41.12
		38.88	29.26	37.5	30.76	52	39.68
		40.2299					71.42
							42.37
obtained from at least 3 individual experiments per condition

## Sheet: 5M
percentage of myofibers with non clustered AChRs		shSCR	shMACF1.1	shMACF1.2	shMACF1.3	shMACF1.4	shMACF1.mix
		51.11	76.92	60.29	60.29	63.82	65.07
		38.63	55.17	57.77	60	61.11	52.63
		45.45	78.57	75	85.71	66.66	66.66
							67.64
							71.42
obtained from at least 3 individual experiments per condition
