# Supplementary material for: MACF1 controls skeletal muscle function through the microtubule-dependent localization of extra-synaptic myonuclei and mitochondria biogenesis
Source: eLife. 2021 Aug 27;10:e70490. doi: 10.7554/eLife.70490 (PMC8500715; doi:10.7554/eLife.70490)
Supplement: Figure 6—source data 1. [file elife-70490-fig6-data1.xlsx]

## Sheet: 6A
	YOUNG																		Normalized to the Max Force
	Force (en mN)
		Cre-									Cre+								Cre-	Cre+	Cre-	Cre+	Cre-	Cre+	Cre-	Cre+	Cre-	Cre+	Cre-	Cre+	Cre-	Cre+
	# frequency	1	10	20	30	50	75	100		# frequency	1	10	20	30	50	75	100		1	1	10	10	20	20	30	30	50	50	75	75	100	100
	Macf1 Cre-									Macf1 Cre+																	#mice
	Mouse 1	341.287	347.305	406.252	534.234	788.606	853.394	844.897		Mouse 1	317.036	327.657	357.926	459.357	831.621	1049.35	1025.98		0.399917	0.302126	0.40697	0.312247	0.476042	0.341093	0.626011	0.437753	0.924082	0.79251	1	1	0.990044	1
	Mouse 2	302.343	321.284	369.078	475.819	698.328	885.257	882.602		Mouse 2	250.478	253.841	288.359	347.836	628.761	870.919	879.947		0.341532	0.284651	0.362927	0.288473	0.416917	0.327701	0.537493	0.395293	0.788842	0.714544	1	0.98974	0.997001	1
	Mouse 3	274.021	280.924	315.974	399.348	671.776	778.516	777.985		Mouse 3	243.22	257.027	302.697	374.389	694.611	856.049	833.745		0.351978	0.284119	0.360846	0.300248	0.405866	0.353598	0.51296	0.437345	0.862892	0.811414	1	1	0.999318	1
	Mouse 4	249.062	257.027	308.539	432.273	690.893	778.516	790.199		Mouse 4	241.981	243.751	298.449	371.734	657.437	832.152	841.18		0.315188	0.287668	0.325269	0.289773	0.390457	0.354798	0.547043	0.441919	0.874328	0.781566	0.985215	0.989268	1	1
	Mean	291.678	301.635	349.961	460.419	712.401	823.921	823.921		Mean	263.179	270.569	311.858	388.329	703.108	902.118	895.214
	SD	39.5926	40.3759	46.2063	58.3315	52.0201	54.0183	48.7534		SD	36.0998	38.4769	31.2954	48.834	89.8167	99.4459	89.5026
	T-test	0.328338	0.307898	0.221066	0.106873	0.863774	0.21624	0.211324										ttest	0.0138964		0.00934635		0.00754391		0.00310206		0.0464172		0.7565		0.184572
	OLD
	Force (en mN)
		Cre-									Cre+								Cre-	Cre+	Cre-	Cre+	Cre-	Cre+	Cre-	Cre+	Cre-	Cre+	Cre-	Cre+	Cre-	Cre+
	# frequency	1	10	20	30	50	75	100		# frequency	1	10	20	30	50	75	100		1	1	10	10	20	20	30	30	50	50	75	75	100	100
	Macf1 Cre-									Macf1 Cre+
	Mouse 1	246.052	301.635	361.113	442.894	584.153	638.851	645.223		Mouse 1	201.267	223.571	246.937	291.545	516.179	447.673	356.864		0.381344	0.389918	0.46749	0.433128	0.559671	0.478395	0.68642	0.564815	0.90535	1	0.990123	0.867284	1	0.691358
	Mouse 2	242.866	287.828	334.56	390.32	553.883	524.675	474.757		Mouse 2	301.635	318.098	339.34	443.956	616.016	863.484	814.628		0.462888	0.349323	0.548583	0.368389	0.637652	0.392989	0.743927	0.514145	1.05567	0.713407	1	1	0.904858	0.943419
	Mouse 3	444.841	575.656	646.285	739.75	843.835	882.071	552.29		Mouse 3	212.596	274.552	314.911	343.588	465.729	583.622	522.551		0.504315	0.364271	0.652619	0.470428	0.732691	0.539581	0.838651	0.588717	0.956653	0.797998	1	1	0.626129	0.895359
	Mouse 4	342.349	391.913	452.453	523.082	727.005	765.771	689.831		Mouse 4	274.729	352.616	456.17	472.102	580.435	691.956	577.78		0.447064	0.397032	0.568129	0.509593	0.655889	0.659248	0.758276	0.682272	1.05389	0.838833	1.11008	1	1	0.834996
	Mouse 5	297.387	308.539	338.278	410.5	612.298	743.998	576.718											0.399714		0.414704		0.454675		0.551749		0.822984		1		0.775161
	Mean	314.699	373.114	426.538	501.309	664.235	711.073	587.764		Mean	247.557	292.209	339.34	387.798	544.59	646.684	567.956
	SD	83.4769	120.343	131.806	142.57	119.88	135.348	83.4721		SD	48.4003	55.8036	87.148	84.6167	66.865	175.721	189.354	ttest	0.0490953		0.157826		0.252849		0.078338		0.14082		0.212514		0.838876
	T-test	0.199282	0.25833	0.294855	0.205269	0.119644	0.552735	0.837934

## Sheet: 6D-F
Macf1 Cre-	Ttubule density Index	Sarcomere Length	SD Angle	Macf1 Cre+	Ttubule density Index	Sarcomere Length	SD Angle
cell1	0.36713	1.99865	6.7035	cell1	0.36422	1.97684	14.5492
cell2	0.39743	1.93984	8.30449	cell2	0.29935	1.94132	18.3468
cell3	0.3354	1.99689	12.8583	cell3	0.34877	1.95977	11.9854
cell4	0.2767	1.96837	14.2228	cell4	0.30678	1.98468	18.5669
cell5	0.34269	2.02715	15.2249	cell5	0.34562	1.96518	10.9094
cell6	0.32658	1.96944	15.8401	cell6	0.40897	1.90754	13.8749
cell7	0.349	1.99689	5.51613	cell7	0.33344	1.9733	14.1488
cell8	0.34678	2.00048	13.2143	cell8	0.31612	1.93984	14.685
cell9	0.3258	1.95879	12.3408	cell9	0.36922	1.99103	11.7237
cell10	0.37463	1.9642	8.685	cell10	0.29038	1.99298	19.3931

## Sheet: 6I
	Macf1 Cre-									Macf1 Cre+
V (mV)	cell1	cell2	cell3	cell4	cell5	cell6	cell7	cell8	cell9	cell1	cell2	cell3	cell4	cell5	cell6	cell7	cell8	cell9
-80	0	0	0	0	0	0	0	0	0	0	0	0	0	0	0	0	0	0
-50	0.59729	0.89155	0.43251	0.89241	0.59747	0.97045	0.61847	0.74904	0.60161	0.83348	0.73965	0.57993	0.70851	0.79527	0.92172	0.67256	0.4471	1.2542
-40	1.09777	0.56107	1.01058	0.94276	0.52875	0.82682	0.65128	1.20702	0.54912	0.82547	1.12499	1.29875	0.73262	0.63682	0.65236	1.12924	0.98331	0.89484
-30	7.6628	1.58847	6.659	3.42874	0.60443	1.20447	2.48008	1.9227	0.83679	4.60393	6.69785	8.60663	1.24766	0.95449	1.39188	5.97019	7.80292	3.19005
-20	25.789	9.79352	24.1679	19.1497	2.08257	7.60113	12.722	10.7973	4.34178	22.2739	23.8905	26.5914	5.20379	4.05925	11.0246	26.6062	23.9572	23.5468
-10	42.2545	26.4506	40.2372	39.7699	9.17072	35.6418	29.7554	24.5902	16.6742	45.1602	49.3416	40.7464	12.7776	11.4212	44.2663	51.8644	30.6944	61.5194
0	51.3306	36.3025	50.8849	56.5385	20.4586	68.2167	44.1544	37.9419	32.8061	63.861	65.9279	49.2012	19.7935	17.9392	83.2377	68.8736	44.0844	87.4851
10	56.1957	34.2876	55.6533	61.5412	31.6876	92.7914	58.5992	49.8342	47.5218	67.2823	78.5033	51.3413	25.4445	21.5509	109.785	81.0101	51.8153	101.722
20	57.3457	42.3716	57.5981	73.8896	38.0078	111.675	67.2176	49.5957	56.9397	91.1741	76.3081	58.5243	30.5518	24.2526	120.787	82.5162	58.4233	106.148
30	58.0907	45.6653	57.8389	79.061	44.5679	119.442	71.7891	52.2313	60.7633	95.0288	86.5634	67.9158	29.9934	27.1703	127.866	80.6884	61.9195	99.7603
40	60.5014	51.5241	56.8198	78.2816	42.0631	119.181	72.503	55.2653	65.0295	98.0024	88.9681	63.2117	30.6251	28.4744	134.381	90.0561	65.0949	114.607
50	62.2077	43.7157	56.5418	77.797	44.5573	130.926	72.6753	65.1509	67.4945	97.9486	95.1278	58.7402	32.2179	29.3454	128.577	87.4736	66.3755	111.559
60	65.2264	44.9217	54.0403	80.5175	44.3351	140.699	77.4728	53.1948	68.6632	100.65	99.0356	57.3193	31.2302	29.0855	131.094	87.5715	67.6895	108.362
