# Supplementary material for: MACF1 controls skeletal muscle function through the microtubule-dependent localization of extra-synaptic myonuclei and mitochondria biogenesis
Source: eLife. 2021 Aug 27;10:e70490. doi: 10.7554/eLife.70490 (PMC8500715; doi:10.7554/eLife.70490)
Supplement: Figure 7—figure supplement 1—source data 1. [file elife-70490-fig7-figsupp1-data1.xlsx]

## Sheet: 6B
percentage of slow myofibers in MACF1 mice		Gastrocnemius					Tibialis Anterior					Soleus
		fibres Myosin slow +	Total fibers	% Fibres de type I			fibres Myosin slow +	Total fibers	% Fibres de type I			fibres Myosin slow +	Total fibers	% Fibres de type I
	Macf1 Cre+	26	2875	0.904348		Macf1 Cre+	142	2146	6.61696		Macf1 Cre+	265	672	39.4345
	Macf1 Cre+	72	2874	2.50522		Macf1 Cre+	17	1666	1.02041		Macf1 Cre+	183	479	38.2046
	Macf1 Cre+	216	3744	5.76923		Macf1 Cre+	94	2108	4.4592		Macf1 Cre+	159	386	41.1917
	Macf1 Cre-	68	3631	1.87276		Macf1 Cre+	169	2182	7.74519		Macf1 Cre+	129	305	42.2951
	Macf1 Cre-	188	4779	3.93388		Macf1 Cre+	151	2177	6.93615		Macf1 Cre+	166	476	34.8739
	Macf1 Cre-	95	3349	2.83667		Macf1 Cre+	75	1973	3.80132		Macf1 Cre-	192	481	39.9168
						Macf1 Cre+	44	1148	3.83275		Macf1 Cre-	169	422	40.0474
						Macf1 Cre-	109	2290	4.75983		Macf1 Cre-	86	212	40.566
						Macf1 Cre-	94	1979	4.74987		Macf1 Cre-	192	440	43.6364
						Macf1 Cre-	105	1494	7.02811
						Macf1 Cre-	45	1053	4.2735

## Sheet: 6C
relative normalized gene expression in MACF1 mice
	Dnm1
	Young - MACF1 Cre-	Young - MACF1 Cre+	Adult - MACF1 Cre-	Adult - MACF1 Cre+
	1.11345	0.929877	0.934502	1.17597
	0.97563	0.879874	1.27985	0.701722
	0.910922	0.872009	0.702533	0.680534
			0.8686	1.11246
			1.01589	0.962347
			1.19862	1.15909
	Dnm2
	Young - MACF1 Cre-	Young - MACF1 Cre+	Adult - MACF1 Cre-	Adult - MACF1 Cre+
	1.06301	1.25716	1.16365	1.29516
	0.990111	1.067	1.22605	0.77999
	0.946878	0.944506	0.92317	0.839098
			0.783388	0.932463
			0.924278	0.964827
			0.979465	0.99487
	PGC1a
	Young - MACF1 Cre-	Young - MACF1 Cre+	Adult - MACF1 Cre-	Adult - MACF1 Cre+
	1.03364	1.21226	0.658142	1.31492
	1.05921	1.12322	1.39146	1.41426
	0.907152	1.08079	1.53288	0.935723
			0.576635	1.13295
			0.942007	0.770852
			0.898871	1.06208

## Sheet: 3E
percentage of fibers with irregular desmin staining		total number	regular	irregular	% regular	% irregular
	Cre-.83	15	8	7	53.3333	46.6667
several myofibers per mouse were studied	Cre-.84	16	12	4	75	25
	Cre-.93	17	11	6	64.7059	35.2941
	Cre+.6	17	2	15	11.7647	88.2353
	Cre+.86	18	5	13	27.7778	72.2222
	Cre+.99	14	2	12	14.2857	85.7143
