# Supplementary material for: MACF1 controls skeletal muscle function through the microtubule-dependent localization of extra-synaptic myonuclei and mitochondria biogenesis
Source: eLife. 2021 Aug 27;10:e70490. doi: 10.7554/eLife.70490 (PMC8500715; doi:10.7554/eLife.70490)
Supplement: Figure 7—source data 1. [file elife-70490-fig7-data1.xlsx]

## Sheet: 7A
YOUNG
	FORCE (% MAXIMAL)																																						FORCE (% MAXIMAL)
	Cre-																																							Cre+
#contractions	5	10	15	20	25	30	35	40	45	50	55	60	65	70	75	80	85	90	95	100	105	110	115	120	125	130	135	140	145	150	155	160	165	170	175	180	Fatigue index			5	10	15	20	25	30	35	40	45	50
Macf1 Cre-																																							Macf1 Cre+
Mouse 1	33.6241	38.3365	41.4918	45.2561	45.3722	45.361	44.2698	43.9704	41.2411	39.5477	37.0518	33.8803	29.9295	27.522	24.3279	21.6052	20.6157	18.6528	18.1232	17.816	16.5057	15.2794	14.7488	14.673	13.1177	12.6001	13.0363	12.6196	12.3343	11.8962	11.5953	11.483	10.8514	10.9495	10.6792	10.5394	0.313449		Mouse 1	29.0717	35.7161	38.3768	44.868	46.9773	49.5261	49.6977	47.9669	46.5377	43.9168
Mouse 2	35.7486	43.6272	45.927	49.0982	49.3526	48.2829	49.1599	48.1789	47.4032	45.0535	42.0663	37.5513	35.4812	33.4538	30.2036	27.5701	25.7678	24.5591	22.6674	21.8431	20.8132	19.4843	19.9208	17.8761	17.7213	16.5698	16.7414	16.1427	15.3331	16.0572	14.8861	14.5347	15.0556	14.626	13.9491	12.7837	0.357599		Mouse 2	31.5807	41.1808	43.8923	46.1072	48.0693	47.2026	47.0736	46.1512	44.0867	40.96
Mouse 3	41.6112	50.6819	48.6434	47.6654	47.5535	46.9229	45.4683	42.8904	40.154	36.7124	32.931	28.9369	25.1017	21.5715	20.4603	17.8058	17.6627	15.0028	15.8019	14.4972	12.635	13.5119	13.2459	11.5696	11.3374	11.9942	11.2102	10.2452	10.7203	9.99339	10.4256	9.06756	8.92022	9.81225	9.40887	8.33255	0.200248		Mouse 3	27.3515	34.7516	40.5756	44.8502	47.4618	49.356	48.1293	47.9739	46.8025	44.4846
Mouse 4	40.42	44.4765	45.3148	43.9399	45.9269	46.7398	45.2666	43.0366	40.7914	37.5202	34.8989	32.2485	30.1481	26.7455	24.291	24.3865	22.4097	20.2124	19.3128	17.761	16.6708	16.0284	15.1471	15.539	14.1394	13.798	13.1612	12.7845	12.7667	12.321	11.0636	10.7371	12.0278	11.0991	10.6912	10.9161	0.270068		Mouse 4	26.2756	31.2979	36.7675	40.9719	46.5966	48.5951	48.2651	47.685	46.1032	45.4373
Mean	37.851	44.2805	45.3443	46.4899	47.0513	46.8266	46.0412	44.5191	42.3974	39.7084	36.737	33.1543	30.1651	27.3232	24.8207	22.8419	21.614	19.6068	18.9763	17.9793	16.6562	16.076	15.7657	14.9144	14.079	13.7405	13.5373	12.948	12.7886	12.567	11.9926	11.4556	11.7138	11.6217	11.1821	10.6429	0.285341		Mean	28.5699	35.7366	39.9031	44.1993	47.2762	48.67	48.2914	47.4442	45.8825	43.6997
SD	3.78708	5.05883	2.94768	2.32445	1.79181	1.19522	2.14417	2.48635	3.36688	3.75766	3.93127	3.58087	4.24085	4.86618	4.02128	4.14863	3.39101	3.95809	2.86019	3.00714	3.34033	2.50519	2.88853	2.60821	2.69014	2.02964	2.31472	2.42527	1.91131	2.53742	1.98734	2.28771	2.56996	2.08367	1.9403	1.82629	0.0670459		SD	2.31412	4.0952	3.08371	2.23064	0.636284	1.05865	1.07823	0.872486	1.23142	1.93119
T-test	0.00579789	0.0393002	0.0434321	0.204862	0.820831	0.0603509	0.109883	0.0681742	0.0998506	0.10774	0.084653	0.073492	0.154201	0.214439	0.113142	0.16996	0.242756	0.142816	0.172989	0.160462	0.111464	0.150076	0.206441	0.153698	0.0738657	0.0727035	0.210662	0.118142	0.237722	0.23394	0.213008	0.179177	0.412152	0.422111	0.366474	0.176672	0.0230771
09/05/201909/05/201909/05/2019
	FORCE (% MAXIMAL)																																						FORCE (% MAXIMAL)
	Cre-																																							Cre+
#contractions	5	10	15	20	25	30	35	40	45	50	55	60	65	70	75	80	85	90	95	100	105	110	115	120	125	130	135	140	145	150	155	160	165	170	175	180	Fatigue index			5	10	15	20	25	30	35	40	45	50
Macf1Cre-																																							Macf1 Cre+
Mouse 1	34.6417	44.7522	47.3293	47.9887	48.9078	47.1479	48.7887	47.5101	49.0703	47.4088	45.2094	41.8814	40.1562	37.3061	34.3098	30.2435	30.4597	26.565	26.081	25.6355	24.2126	21.6657	22.9323	23.2373	21.3823	21.2941	20.6654	20.4528	20.377	20.2871	20.1962	19.9819	18.4045	18.6155	18.0498	18.5073	0.534248		Mouse 1	29.2191	29.7242	33.7693	39.1368	45.4352	46.2966	46.6305	46.7698	47.1518	46.1654
Mouse 2	27.3283	34.9459	38.1411	45.8389	47.3953	48.4685	49.8246	50.6738	48.3148	44.6818	40.9904	35.3565	32.5153	29.756	26.951	24.6256	21.5259	20.578	19.1296	17.4158	18.3507	16.6177	14.9501	15.2232	15.1836	14.3621	14.3072	14.0226	14.154	13.3614	12.7541	13.9715	13.1691	13.5202	12.2005	13.1013	0.479404		Mouse 2	39.7639	47.864	57.1642	58.7384	63.1906	59.2075	55.1092	53.9789	51.9952	51.1334
Mouse 3	39.5036	40.1634	33.1863	42.7901	43.6485	45.5356	46.2549	44.9813	43.1285	42.7444	40.2567	38.3211	34.7938	31.3371	29.8097	26.8617	26.3698	24.9584	24.8118	22.4732	20.9916	21.9352	21.5156	19.8567	19.2342	18.9548	16.6958	18.015	16.951	16.1123	15.8156	15.514	14.3844	13.9208	13.6445	12.9555	0.327958		Mouse 3	23.7074	30.5667	34.2505	39.2089	41.6266	41.826	38.4339	37.025	35.9206	35.0403
Mouse 4	41.1611	45.2011	44.9785	44.211	44.4891	43.2224	39.7255	38.5535	36.5429	36.8437	33.45	31.6161	30.1943	28.2239	26.1872	24.93	23.9061	23.5015	23.0343	21.8972	20.4058	19.9944	19.3897	19.964	18.9999	17.6174	17.5293	16.9003	16.621	15.7353	15.2859	14.8687	14.4223	14.2874	13.2895	12.6354	0.306973		Mouse 4	29.3453	39.8758	41.8628	45.9103	50.7406	51.5115	52.6594	53.8466	52.9529	51.8889
14	35.6015	40.6254	46.6245	50.614	49.9396	47.5106	46.7454	45.8397	47.284	46.168	43.2222	44.7042	40.8898	38.9225	36.7563	34.2908	33.2562	32.9298	30.9278	30.3863	28.7266	27.3809	27.1679	26.9207	24.6873	25.7887	23.2782	22.8781	23.7893	22.8766	21.1701	21.431	19.6255	18.9736	19.8537	17.8772	0.502148
Mean	35.6473	41.1376	42.0519	46.2885	46.8761	46.377	46.2678	45.5117	44.8681	43.5694	40.6257	38.3759	35.7099	33.1091	30.8028	28.1903	27.1035	25.7065	24.7969	23.5616	22.5375	21.5188	21.1911	21.0404	19.8975	19.6034	18.4952	18.4537	18.3784	17.6745	17.0444	17.1534	16.0012	15.8635	15.4076	15.0153	0.430146		Mean	30.5089	37.0077	41.7617	45.7486	50.2483	49.7104	48.2083	47.9051	47.0052	46.057
SD	5.37338	4.15711	6.14851	3.09668	2.73396	2.05628	3.93813	4.45663	5.1892	4.14265	4.45851	5.17569	4.69221	4.73443	4.60623	4.0784	4.76945	4.5999	4.31456	4.81155	4.04889	3.90202	4.50154	4.35329	3.48614	4.27061	3.51059	3.38422	3.74979	3.83049	3.53426	3.32905	2.83016	2.69237	3.34029	2.91353	0.104955		SD	6.70656	8.57559	10.917	9.22398	9.4029	7.46675	7.42659	7.99705	7.81377	7.77089
T-test	0.24112	0.370482	0.960944	0.904583	0.464168	0.364928	0.627463	0.584513	0.636295	0.554418	0.406798	0.477712	0.541171	0.590395	0.641043	0.311713	0.822494	0.623613	0.617047	0.570917	0.33129	0.531415	0.574243	0.797986	0.505012	0.806967	0.465923	0.827541	0.42071	0.419675	0.375291	0.678789	0.247092	0.322906	0.310761	0.194961	0.0229083
																									09/05/201909/05/201909/05/201909/05/2019
Mean	37.851	44.2805	45.3443	46.4899	47.0513	46.8266	46.0412	44.5191	42.3974	39.7084	36.737	33.1543	30.1651	27.3232	24.8207	22.8419	21.614	19.6068	18.9763	17.9793	16.6562	16.076	15.7657	14.9144	14.079	13.7405	13.5373	12.948	12.7886	12.567	11.9926	11.4556	11.7138	11.6217	11.1821	10.6429				28.5699	35.7366	39.9031	44.1993	47.2762	48.67	48.2914	47.4442	45.8825	43.6997
Mean	35.6473	41.1376	42.0519	46.2885	46.8761	46.377	46.2678	45.5117	44.8681	43.5694	40.6257	38.3759	35.7099	33.1091	30.8028	28.1903	27.1035	25.7065	24.7969	23.5616	22.5375	21.5188	21.1911	21.0404	19.8975	19.6034	18.4952	18.4537	18.3784	17.6745	17.0444	17.1534	16.0012	15.8635	15.4076	15.0153				30.5089	37.0077	41.7617	45.7486	50.2483	49.7104	48.2083	47.9051	47.0052	46.057
SD	3.78708	5.05883	2.94768	2.32445	1.79181	1.19522	2.14417	2.48635	3.36688	3.75766	3.93127	3.58087	4.24085	4.86618	4.02128	4.14863	3.39101	3.95809	2.86019	3.00714	3.34033	2.50519	2.88853	2.60821	2.69014	2.02964	2.31472	2.42527	1.91131	2.53742	1.98734	2.28771	2.56996	2.08367	1.9403	1.82629				2.31412	4.0952	3.08371	2.23064	0.636284	1.05865	1.07823	0.872486	1.23142	1.93119
SD	5.37338	4.15711	6.14851	3.09668	2.73396	2.05628	3.93813	4.45663	5.1892	4.14265	4.45851	5.17569	4.69221	4.73443	4.60623	4.0784	4.76945	4.5999	4.31456	4.81155	4.04889	3.90202	4.50154	4.35329	3.48614	4.27061	3.51059	3.38422	3.74979	3.83049	3.53426	3.32905	2.83016	2.69237	3.34029	2.91353				6.70656	8.57559	10.917	9.22398	9.4029	7.46675	7.42659	7.99705	7.81377	7.77089
																																		0.285341	0.434833
																																		0.430146	0.604779
																																		0.0670459	0.0723673
																																		0.104955	0.063911
																		Fatigue protocol: 180 stimulation trains delivered at 30 Hz , 0,3 s on/0,7 s off
																																				a	b		e	r
																																				0.313449	0.416604		0.534248	0.650192
																																				0.357599	0.361121		0.479404	0.57848
																																				0.200248	0.42733		0.327958	0.526968
																																				0.270068	0.534277		0.306973	0.663476
																																							0.502148
																																				0.0230771			0.0229083
																																				a	b		e	r
																																				0.313448685453845	0.416604322191552		0.534248158612486	0.650192061926929
																																				0.357599381433616	0.361120964222916		0.479403934343052	0.578479501188369
																																				0.200247704661572	0.427329879576483		0.327958052391192	0.526967964499398
																																				0.270068009145497	0.534276617257472		0.306973458114023	0.663475551325272
																																							0.502148413933766
[truncated: 27 more columns]

## Sheet: 7C
Macf1 Cre-	Macf1 Cre+	Macf1 Cre-	Macf1 Cre+
Tibialis anterior
% fibers with high SDH content		% fibers with low SDH content
22.7513	26.4188	77.2487	75.1166
17.124	23.348	82.876	72.4905
19.4399	45.3285	80.5601	54.6715
28.223	27.5095	71.777	72.4905
24.7525	37.7962	75.2475	62.2038
16.5385	48.7892	83.4615	51.2108
25.1938	41.8678	74.8062	58.1322
29.5882		70.4118

## Sheet: 7E
mitochondrial vs. genomic DNA analysis	Young - Cre -	Young - Cre +	Adult - Cre -	Adult - Cre +
	763.301	793.056	648.758	1334.56
	976.364	883.298	973.671	953.047
	1040.31	1058.47	955.426	1351.87

## Sheet: 7F
Sarcolipin relative gene expression level	Young - Cre -	Young - Cre +	Adult - Cre -	Adult - Cre +
	0.0254506	0.370797	0.0788253	1.59815
	0.0123735	0.118404	0.134108	1.27506
	0.022876	0.249727	0.0445903	0.252633
			0.121484	0.808995
			0.1046	9.24776
			0.059294	4.17825

## Sheet: 7H
mitochondia staining analysis
		total number	regular	irregular	% regular	% irregular
	Cre-.83	15	9	6	60	40
	Cre-.84	16	12	4	75	25
	Cre-.93	17	11	6	64.7059	35.2941
	Cre+.6	17	4	13	23.5294	76.4706
	Cre+.86	18	6	12	33.3333	66.6667
	Cre+.99	14	3	11	21.4286	78.5714

## Sheet: 7K
Mitochondrial content per area
	SiRNA experiments		ShRNA experiments
obtained from 3 individual experiments per condition	siSCR	siMACF1.mix	shSCR	shMACF1.mix
	5.0411	11.0371	8.41694	14.33
	6.07243	11.2404	7.60741	11.3459
	6.01426	11.0833	10.0889	5.95218
	6.02491	10.7796	10.9067	8.03151
	8.30932	7.82074	7.75581	11.5733
	6.27371	9.2282	8.62521	14.751
	12.3783	9.47118	8.78277	11.6547
	6.16626	6.14676	10.0247	10.7453
	5.8572	14.8455	8.77363	16.011
	8.66292	16.2588	14.131	14.1267
	8.44014	9.70566	9.1622	11.9535
	10.3805	10.1865	7.67504
	9.31102	11.4753	11.479
	11.0633	14.4559	5.7407
	9.56352	8.71486	7.41857
	8.88316		7.92668
	7.95966		13.3388
	10.9209		8.79076
	12.5568		7.58884
	9.29771		6.4112
	6.39878		8.42901
			7.79514
			8.24876
