# Supplementary material for: MACF1 controls skeletal muscle function through the microtubule-dependent localization of extra-synaptic myonuclei and mitochondria biogenesis
Source: eLife journal article supplement (doi:10.7554/elife.70490), 2021-08-27

## OXPHOS

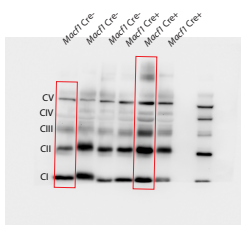

## TOM20

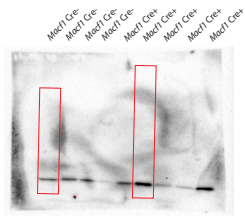

## Actin

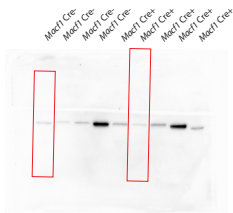

Supplement: supp [file elife-70490-supp-v1.zip]
